# Supplementary material for: The kynurenic acid analog SZR104 induces cytomorphological changes associated with the anti-inflammatory phenotype in cultured microglia
Source: PubMed Central journal article supplement (PMC10344911; doi:10.1038/s41598-023-38107-8), 2023-07-13
Supplement: 41598_2023_38107_MOESM1_ESM.pdf [file 41598_2023_38107_MOESM1_ESM.pdf]

Supplementary Figure S1

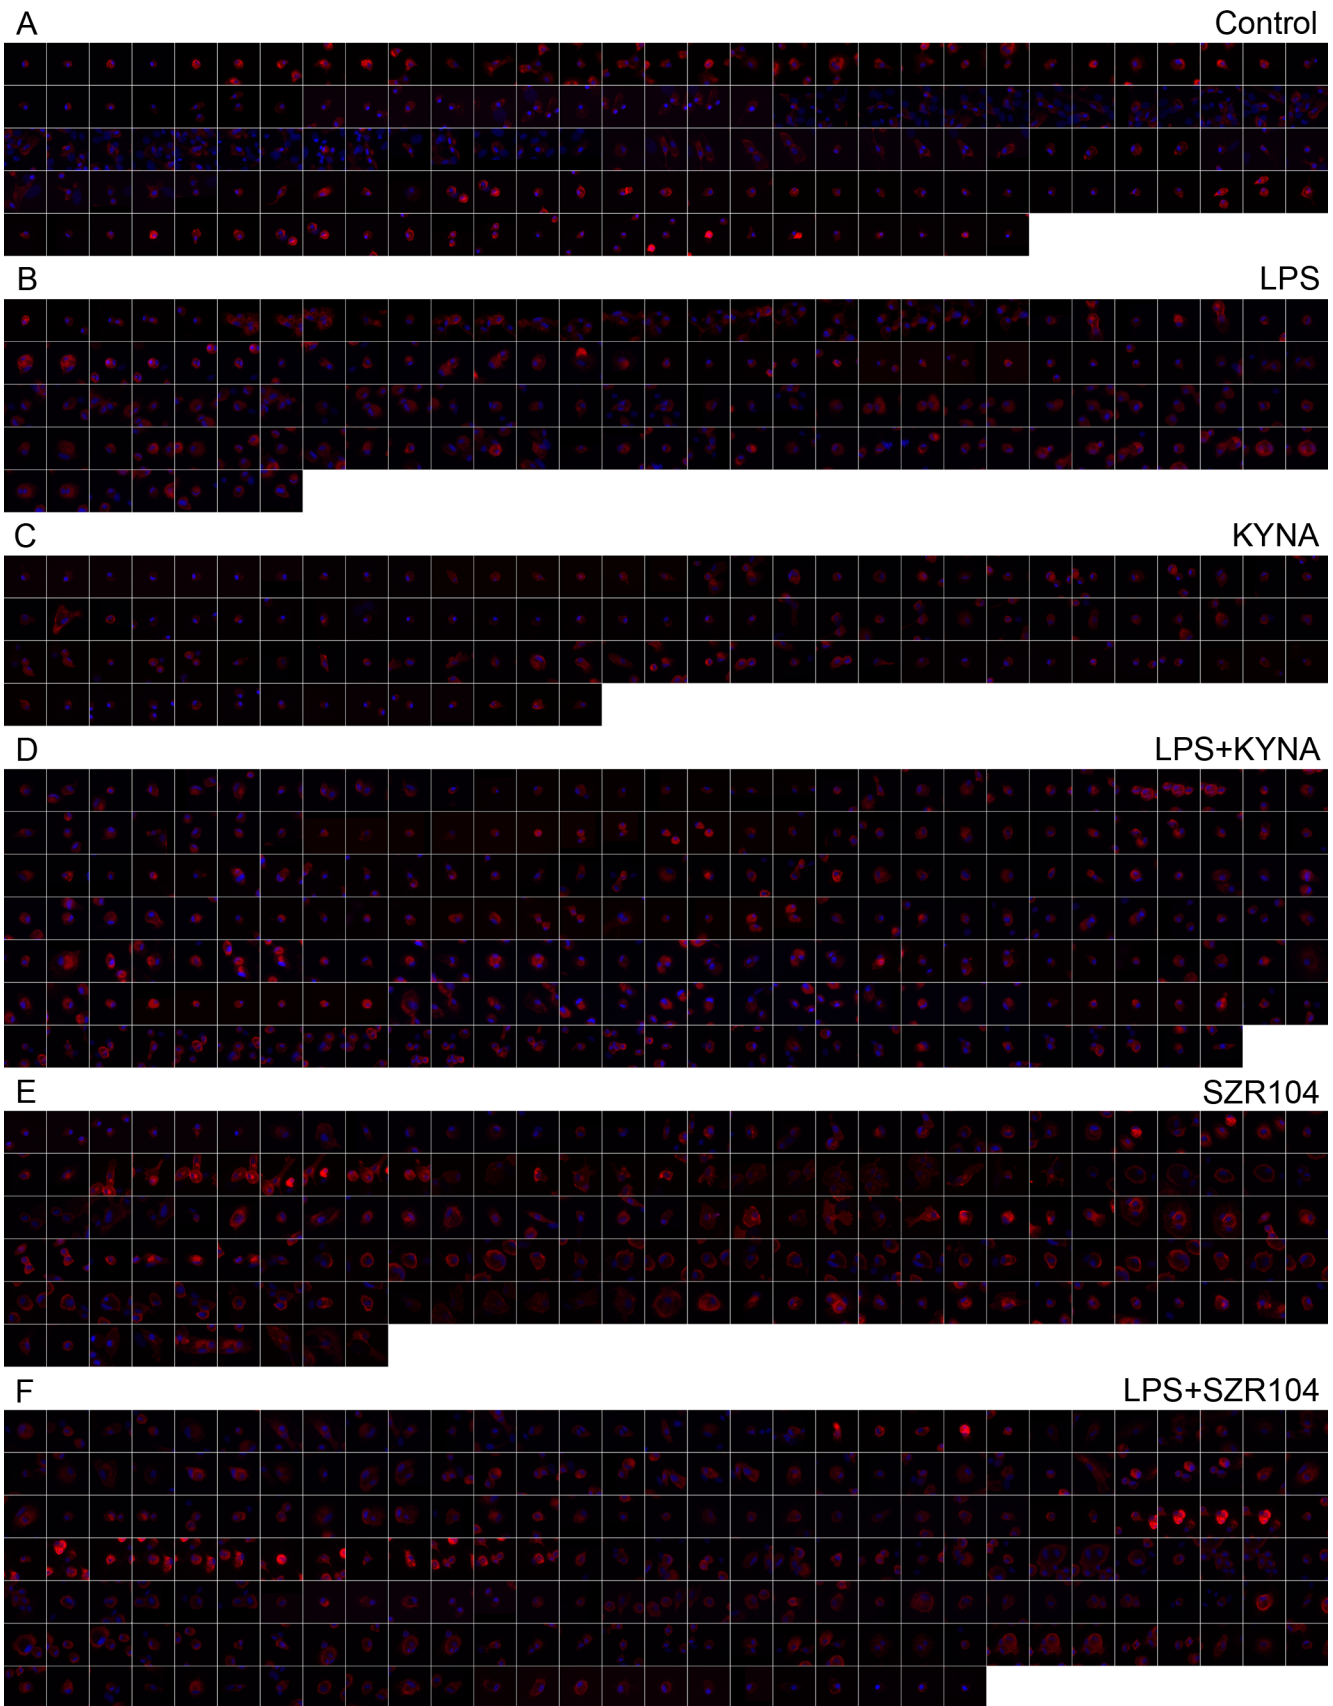

Supplementary Figure S2

A

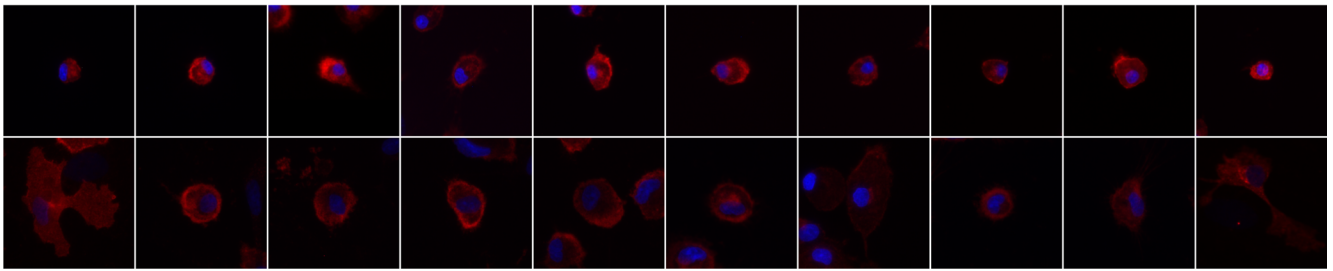

B

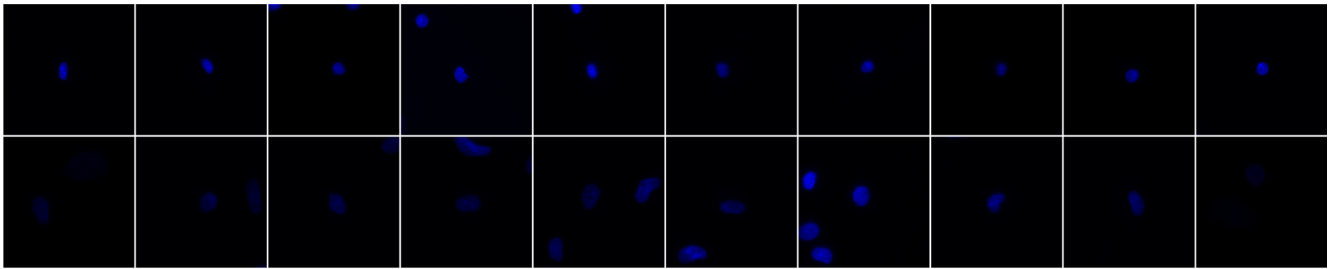

C

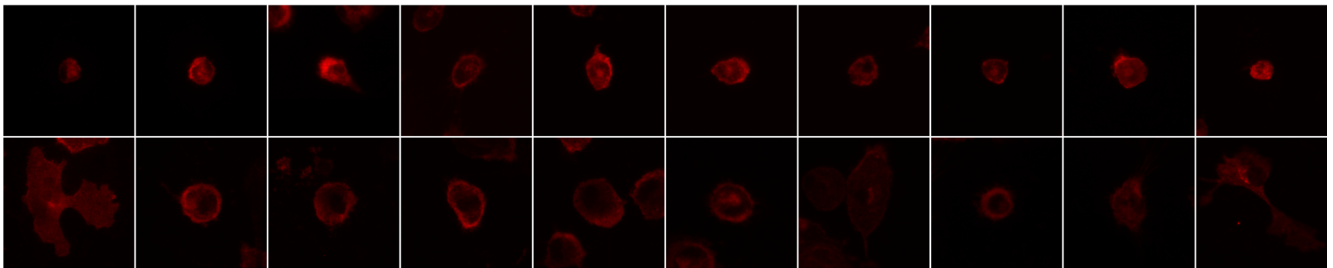

D

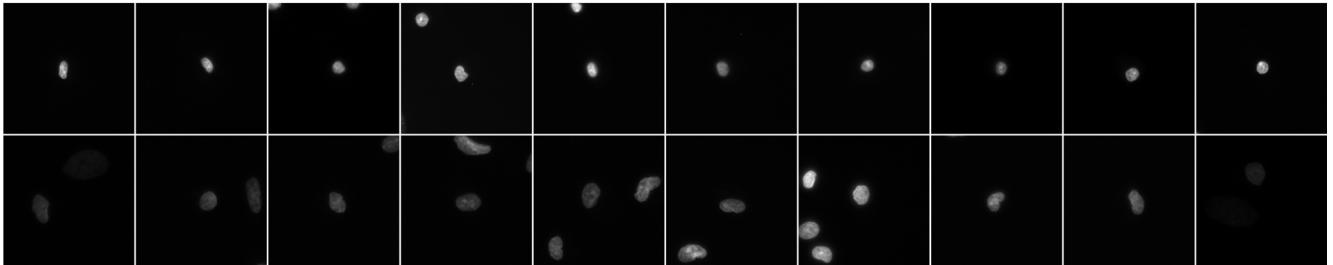

E

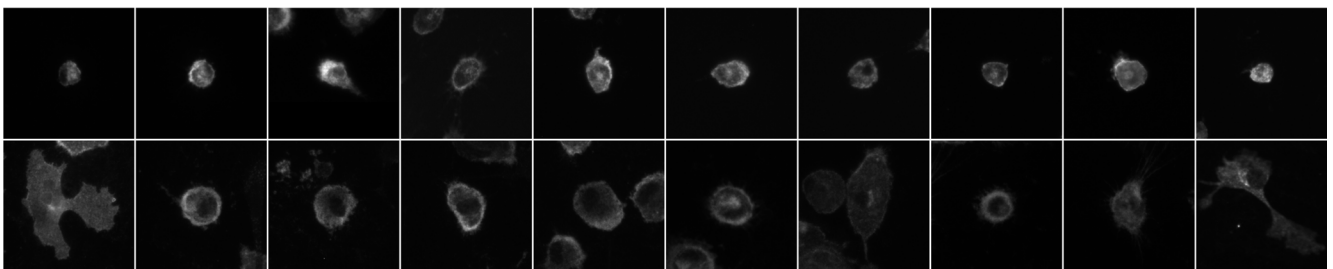

F

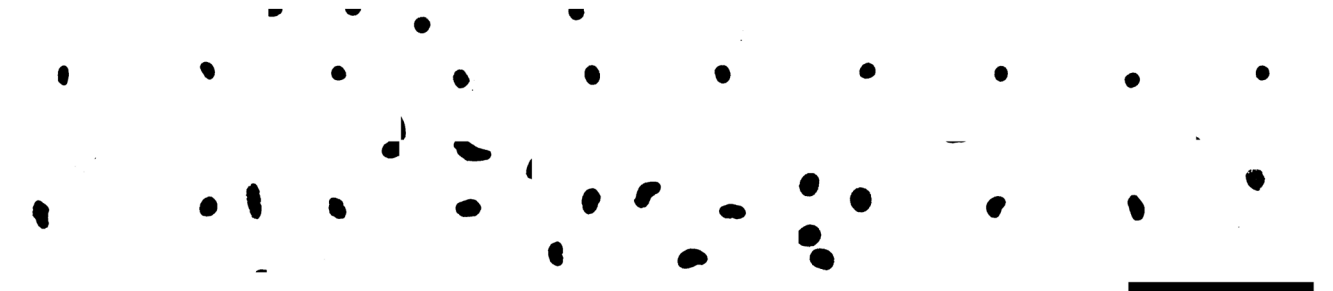

Supplementary Figure S3

G

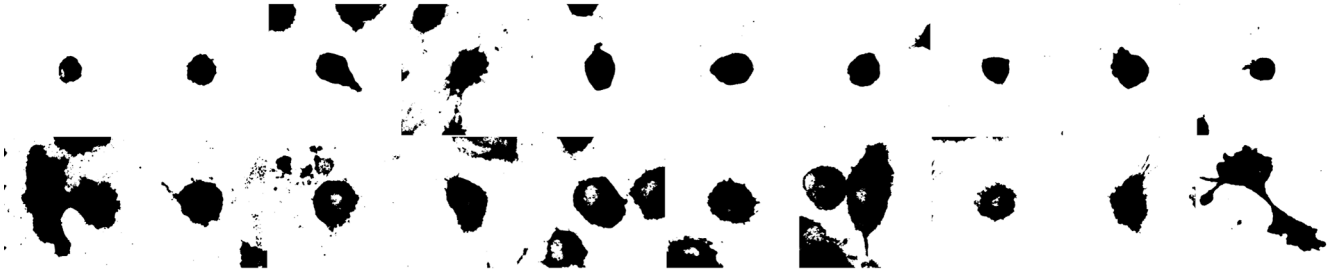

H

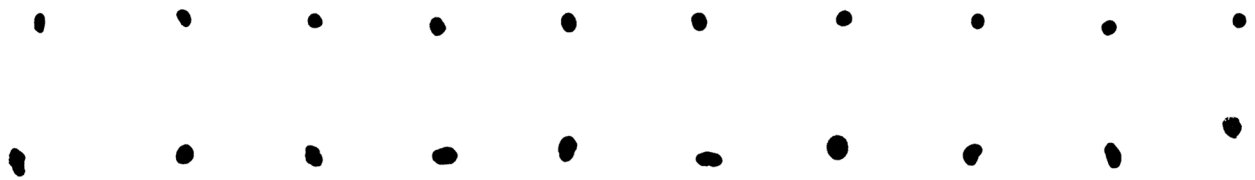

I

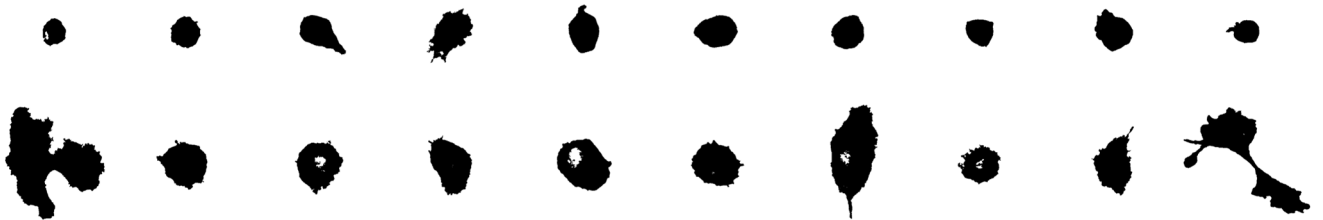

J

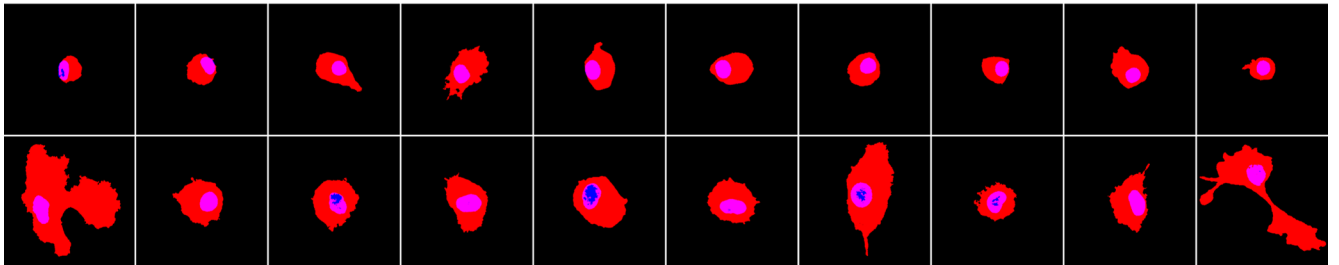

K

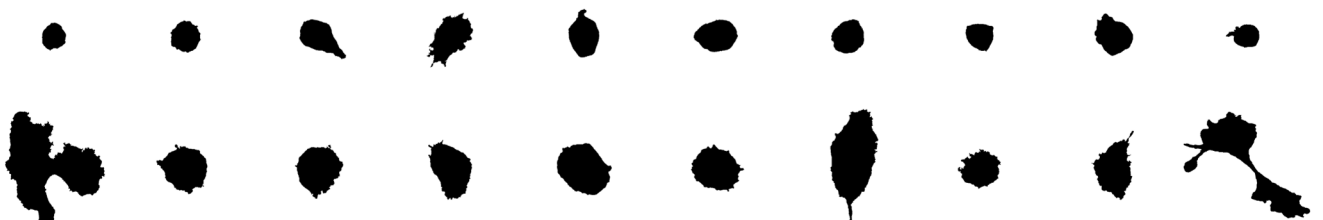

L

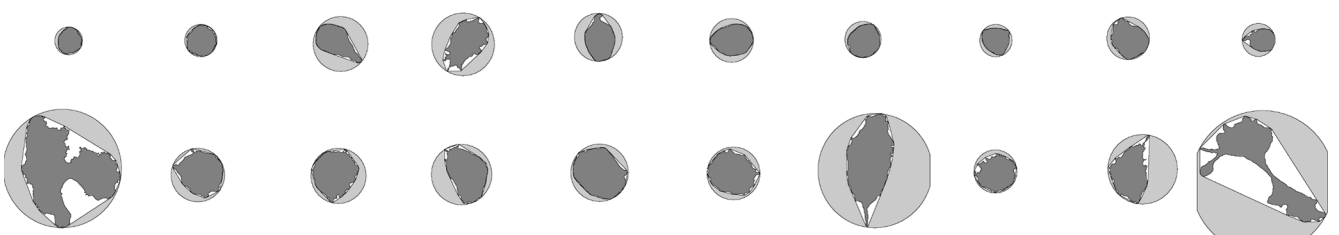

Supplementary Figure S4

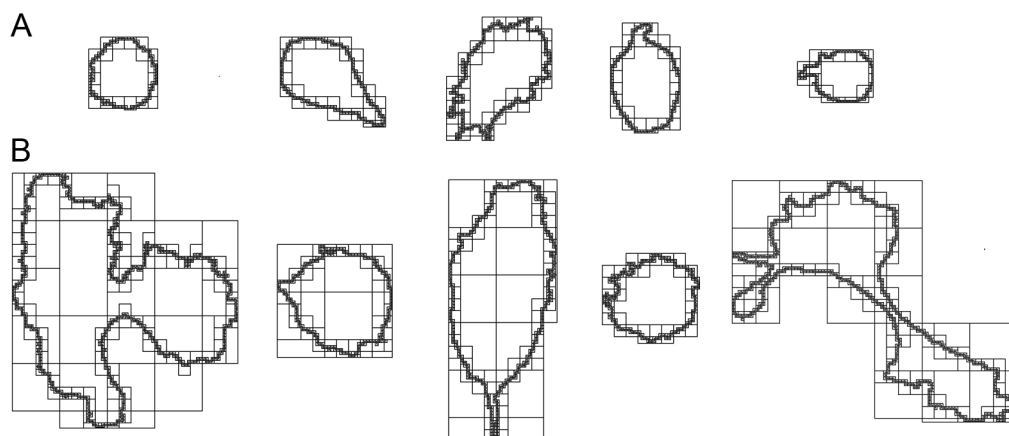

# Supplementary Table S1

| Num1 | Group   | Num2 | Fractal Dim | Lacunarity | Area     | Perimeter | Circularity | Ti       | Hull Area | Hull Perim | Hull Circu | Mean Radiu | MSACH    | Diameter o | Span Ratio | Max/Min R | Density  | Roughness |
|------|---------|------|-------------|------------|----------|-----------|-------------|----------|-----------|------------|------------|------------|----------|------------|------------|-----------|----------|-----------|
| 1    | CONTROL | 1    | 1.0328      | 0.1355     | 145,4907 | 46,48032  | 0.835294    | 1,197184 | 145,4907  | 43,5108    | 0.965718   | 6,994805   | 15,16138 | 15,16156   | 1,1329     | 1,4552    | 0.987035 | 1,068248  |
| 2    | CONTROL | 2    | 1.052       | 0.1253     | 177,6822 | 55,01613  | 0.707409    | 1,41361  | 177,6822  | 49,84472   | 0.898701   | 8,454574   | 19,58798 | 19,58798   | 1,5172     | 2,9484    | 0.958953 | 1,103751  |
| 3    | CONTROL | 3    | 1.0465      | 0.1137     | 215,3438 | 58,67358  | 0.75657     | 1,321755 | 215,3438  | 52,77246   | 0.971689   | 8,59117    | 17,62468 | 17,64429   | 1,0564     | 2,1974    | 0.962482 | 1,111822  |
| 4    | CONTROL | 4    | 1.0509      | 0.1208     | 129,6464 | 43,47145  | 0.860854    | 1,161638 | 129,6464  | 40,85926   | 0.975863   | 6,788333   | 13,72138 | 13,72186   | 1,0719     | 2,6681    | 0.998545 | 1,063932  |
| 5    | CONTROL | 5    | 1.0421      | 0.1055     | 282,0847 | 66,42145  | 0.77885     | 1,283944 | 282,0847  | 61,1030    | 0.939954   | 10,73936   | 22,47371 | 22,47371   | 1,2746     | 2,7407    | 0.993953 | 1,081601  |
| 6    | CONTROL | 6    | 1.0336      | 0.0968     | 264,0083 | 62,47039  | 0.845967    | 1,18208  | 264,0083  | 57,99989   | 0.986218   | 9,54734    | 19,22103 | 19,30571   | 1,0648     | 2,6336    | 0.995118 | 1,077078  |
| 7    | CONTROL | 7    | 1.0308      | 0.11       | 278,155  | 68,40975  | 0.721066    | 1,386836 | 278,155   | 63,15103   | 0.876467   | 10,95294   | 23,25941 | 23,30369   | 1,3411     | 1,7614    | 0.965416 | 1,038372  |
| 8    | CONTROL | 8    | 1.0697      | 0.2491     | 527,7338 | 103,277   | 0.518973    | 1,926883 | 527,7338  | 88,07491   | 0.854909   | 15,19105   | 33,46934 | 33,46934   | 1,3358     | 1,778     | 0.834694 | 1,172604  |
| 9    | CONTROL | 9    | 1.0593      | 0.259      | 440,213  | 91,26631  | 0.605744    | 1,650862 | 440,213   | 79,27385   | 0.880263   | 13,10087   | 26,82057 | 28,57615   | 1,1601     | 1,9754    | 0.91209  | 1,151279  |
| 10   | CONTROL | 10   | 1.0288      | 0.107      | 416,0694 | 87,95319  | 0.582787    | 1,715893 | 416,0694  | 79,82305   | 0.820576   | 14,21032   | 27,64422 | 29,06945   | 1,1917     | 1,379     | 0.862259 | 1,101852  |
| 11   | CONTROL | 11   | 1.0693      | 0.1338     | 365,2357 | 97,98298  | 0.402182    | 2,486438 | 365,2357  | 85,66621   | 0.625408   | 18,80387   | 37,42521 | 37,42521   | 2,4095     | 2,8367    | 0.841281 | 1,143776  |
| 12   | CONTROL | 12   | 1.0667      | 0.2302     | 1122,114 | 170,9449  | 0.334821    | 2,986671 | 1122,114  | 136,9311   | 0.752043   | 25,38869   | 54,26459 | 54,26459   | 2,0568     | 1,2545    | 0.69387  | 1,248401  |
| 13   | CONTROL | 13   | 1.066       | 0.0939     | 465,6142 | 97,56028  | 0.577507    | 1,731581 | 465,6142  | 79,6286    | 0.922779   | 14,06516   | 28,88112 | 28,88713   | 1,269      | 2,9805    | 0.939437 | 1,225192  |
| 14   | CONTROL | 14   | 1.0258      | 0.1371     | 199,4995 | 57,78174  | 0.732184    | 1,365776 | 199,4995  | 53,27417   | 0.88332    | 10,0725    | 20,0989  | 20,15603   | 1,3497     | 2,862     | 0.975102 | 1,084611  |
| 15   | CONTROL | 15   | 1.0447      | 0.0927     | 357,7851 | 79,8789   | 0.662477    | 1,509486 | 357,7851  | 71,15374   | 0.888048   | 11,92622   | 26,15715 | 26,22046   | 1,533      | 1,6363    | 0.940163 | 1,122264  |
| 16   | CONTROL | 16   | 1.0583      | 0.1179     | 280,1041 | 73,93652  | 0.581596    | 1,719407 | 280,1041  | 61,98035   | 0.916265   | 10,40894   | 21,2766  | 22,29328   | 1,2065     | 1,7962    | 0.903255 | 1,192903  |
| 17   | CONTROL | 17   | 1.0335      | 0.1072     | 288,1206 | 69,01507  | 0.736506    | 1,357762 | 288,1206  | 62,39911   | 0.92988    | 10,97025   | 21,27956 | 21,1129    | 1,1679     | 2,395     | 0.968903 | 1,106026  |
| 18   | CONTROL | 18   | 1.135       | 0.0919     | 542,9179 | 128,2404  | 0.372983    | 2,681088 | 542,9179  | 85,74874   | 0.927872   | 13,95626   | 30,22569 | 30,22887   | 1,2672     | 1,7812    | 0.899074 | 1,495537  |
| 19   | CONTROL | 19   | 1.0529      | 0.2694     | 474,165  | 95,78723  | 0.575403    | 1,737911 | 474,165   | 83,21007   | 0.860572   | 14,10707   | 29,34598 | 29,36789   | 1,0967     | 2,3171    | 0.866031 | 1,151515  |
| 20   | CONTROL | 20   | 1.0656      | 0.1742     | 991,8389 | 146,1535  | 0.56074     | 1,783357 | 991,8389  | 115,2416   | 0.938496   | 18,2911    | 40,42243 | 40,97172   | 1,206      | 1,881     | 0.961014 | 1,268236  |
| 21   | CONTROL | 21   | 1.0364      | 0.1079     | 476,8057 | 106,3037  | 0.434815    | 2,299827 | 476,8057  | 89,4794    | 0.74835    | 16,6805    | 35,27121 | 35,27121   | 2,0166     | 1,78      | 0.82007  | 1,188025  |
| 22   | CONTROL | 22   | 1.1212      | 0.2233     | 848,486  | 168,9537  | 0.315164    | 3,172956 | 848,486   | 112,6343   | 0.840452   | 19,56466   | 38,0252  | 40,16941   | 1,113      | 1,7664    | 0.843757 | 1,50002   |
| 23   | CONTROL | 23   | 1.0586      | 0.1288     | 245,6805 | 69,80284  | 0.586764    | 1,704262 | 245,6805  | 58,67732   | 0.936685   | 9,994025   | 21,82004 | 21,82715   | 1,4074     | 1,9414    | 0.926704 | 1,196905  |
| 24   | CONTROL | 24   | 1.0395      | 0.1225     | 214,2435 | 59,97039  | 0.703663    | 1,421136 | 214,2435  | 54,9291    | 0.892303   | 9,697961   | 21,17663 | 21,17663   | 1,4995     | 2,8651    | 0.939985 | 1,091778  |
| 25   | CONTROL | 25   | 1.0396      | 0.1069     | 361,4946 | 81,71702  | 0.641765    | 1,558203 | 361,4946  | 71,42113   | 0.890549   | 13,31459   | 26,58984 | 26,59326   | 1,5592     | 2,3823    | 0.943386 | 1,144157  |
| 26   | CONTROL | 26   | 1.0326      | 0.105      | 258,2239 | 64,09663  | 0.76589     | 1,30567  | 258,2239  | 58,82094   | 0.937869   | 10,78888   | 21,26255 | 21,26255   | 1,1647     | 1,2545    | 0.969686 | 1,089691  |
| 27   | CONTROL | 27   | 1.0944      | 0.226      | 642,5419 | 121,8248  | 0.514105    | 1,945127 | 642,5419  | 92,54766   | 0.942714   | 14,7483    | 32,31871 | 32,52977   | 1,1367     | 1,5586    | 0.944958 | 1,316347  |
| 28   | CONTROL | 28   | 1.0519      | 0.0838     | 533,2352 | 101,142   | 0.618117    | 1,617816 | 533,2352  | 84,52268   | 0.937955   | 14,49663   | 30,42059 | 30,50890   | 1,2973     | 2,5228    | 0.943639 | 1,196626  |
| 29   | CONTROL | 29   | 1.0343      | 0.1086     | 316,8226 | 79,06578  | 0.592315    | 1,688291 | 316,8226  | 72,38293   | 0.759895   | 13,80569   | 29,89048 | 29,89048   | 1,8634     | 2,054     | 0.930046 | 1,092326  |
| 30   | CONTROL | 30   | 1.0504      | 0.0977     | 269,8556 | 66,63972  | 0.744045    | 1,344005 | 269,8556  | 61,37213   | 0.900324   | 10,08683   | 23,21071 | 23,21918   | 1,3688     | 1,8197    | 0.974371 | 1,08583   |
| 31   | CONTROL | 31   | 1.0335      | 0.1338     | 147,9742 | 47,14663  | 0.822692    | 1,215522 | 147,9742  | 44,53507   | 0.937543   | 7,533387   | 16,5569  | 16,5569    | 1,3616     | 2,8255    | 0.93429  | 1,058641  |
| 32   | CONTROL | 32   | 1.0292      | 0.1258     | 189,5969 | 54,68688  | 0.77315     | 1,293411 | 189,5969  | 50,77011   | 0.924325   | 9,135638   | 18,64739 | 18,6573    | 1,3001     | 2,2046    | 0.970486 | 1,077147  |
| 33   | CONTROL | 33   | 1.0338      | 0.1348     | 143,7931 | 46,43741  | 0.831159    | 1,203139 | 143,7931  | 43,29897   | 0.963812   | 6,795408   | 14,98725 | 15,00984   | 1,1267     | 1,8811    | 0.991911 | 1,072483  |
| 34   | CONTROL | 34   | 1.0406      | 0.1251     | 171,772  | 54,07411  | 0.71241     | 1,403685 | 171,772   | 49,02654   | 0.898048   | 9,21289    | 19,2684  | 19,2684    | 1,4967     | 3,8626    | 0.965044 | 1,102956  |
| 35   | CONTROL | 35   | 1.0933      | 0.1749     | 174,0355 | 73,06259  | 0.355372    | 2,819352 | 174,0355  | 49,4997    | 0.89257    | 8,611365   | 19,08316 | 19,08316   | 1,4977     | 2,529     | 0.867413 | 1,476021  |
| 36   | CONTROL | 36   | 1.037       | 0.1498     | 227,4156 | 71,18564  | 0.51414     | 1,944996 | 227,4156  | 63,14188   | 0.716795   | 10,12151   | 27,1653  | 27,1653    | 2,2717     | 2,5241    | 0.911667 | 1,127392  |
| 37   | CONTROL | 37   | 1.0278      | 0.1188     | 178,311  | 52,05018  | 0.811469    | 1,232333 | 178,311   | 48,14652   | 0.966624   | 8,248652   | 15,92392 | 16,19002   | 1,0606     | 3,2411    | 0.981135 | 1,081079  |
| 38   | CONTROL | 38   | 1.0712      | 0.1251     | 288,2149 | 78,80461  | 0.517367    | 1,932864 | 288,2149  | 63,65277   | 0.893905   | 10,19223   | 22,21624 | 22,85574   | 1,153      | 1,4245    | 0.887107 | 1,238039  |
| 39   | CONTROL | 39   | 1.0897      | 0.1167     | 292,1445 | 83,42926  | 0.495597    | 2,01777  | 292,1445  | 64,54359   | 0.881205   | 10,07521   | 24,60199 | 24,77773   | 1,6045     | 1,8462    | 0.939632 | 1,292567  |
| 40   | CONTROL | 40   | 1.0993      | 0.1443     | 185,6987 | 67,43191  | 0.472541    | 2,116219 | 185,6987  | 50,36603   | 0.919905   | 9,028475   | 17,46071 | 17,56817   | 1,298      | 2,8037    | 0.920772 | 1,388837  |
| 41   | CONTROL | 41   | 1.1207      | 0.1129     | 482,8102 | 133,4454  | 0.27504     | 3,635836 | 482,8102  | 84,50623   | 0.849667   | 14,97927   | 34,20883 | 34,20883   | 1,7555     | 2,3546    | 0.807267 | 1,579192  |
| 42   | CONTROL | 42   | 1.1163      | 0.1284     | 187,4591 | 62,70337  | 0.556646    | 1,796473 | 187,4591  | 50,66147   | 0.917826   | 7,939929   | 18,53918 | 18,60105   | 1,253      | 1,9378    | 0.929063 | 1,327693  |
| 43   | CONTROL | 43   | 1.1767      | 0.2919     | 620,0015 | 181,9968  | 0.174596    | 5,727497 | 620,0015  | 103,5147   | 0.727106   | 18,52512   | 42,26    | 42,26865   | 2,1357     | 2,6774    | 0.742268 | 1,758173  |
| 44   | CONTROL | 44   | 1.1392      | 0.1372     | 465,6456 | 138,8149  | 0.238593    | 4,19124  | 465,6456  | 84,71163   | 0.815415   | 15,04193   | 34,18126 | 34,18126   | 1,7833     | 2,7363    | 0.785174 | 1,638676  |
| 45   | CONTROL | 45   | 1.0658      | 0.0947     | 446,7834 | 96,91915  | 0.567888    | 1,760912 | 446,7834  | 79,18736   | 0.895354   | 12,7264    | 30,61683 | 30,61704   | 1,3597     | 1,8199    | 0.950113 | 1,223922  |
| 46   | CONTROL | 46   | 1.1055      | 0.1023     | 540,3715 | 126,3635  | 0.375882    | 2,666008 | 540,3715  | 91,72743   | 0.807056   | 17,11401   | 35,78268 | 35,78268   | 1,6978     | 2,9327    | 0.883879 | 1,377597  |
| 47   | CONTROL | 47   | 1.0749      | 0.094      | 358,6967 | 83,59397  | 0.618809    | 1,616007 | 358,6967  | 61,74459   | 0.882335   | 11,2511    | 27,93383 | 27,93383   | 1,5077     | 1,7589    | 0.959334 | 1,169562  |
| 48   | CONTROL | 48   | 1.0653      | 0.115      | 147,817  | 53,48351  | 0.625895    | 1,597712 | 147,817   | 40,01846   | 0.958659   | 7,699486   | 14,71204 | 14,89899   | 1,0522     | 2,7001    | 0.963845 | 1,215025  |
| 49   | CONTROL | 49   | 1.1018      | 0.2949     | 441,8792 | 113,203   | 0.366999    | 2,742804 | 441,8792  | 81,75472   | 0.830783   | 13,81988   | 33,19346 | 33,19346   | 1,6406     | 1,8088    | 0.846699 | 1,384666  |
| 50   | CONTROL | 50   | 1.0562      | 0.1359     | 163,5041 | 55,16312  | 0.643925    | 1,552976 | 163,5041  | 49,27493   | 0.846226   | 8,293564   | 19,9608  | 19,9608    | 1,6791     | 3,1491    | 0.953663 | 1,119497  |
| 51   | CONTROL | 51   | 1.0723      | 0.1112     | 298,5891 | 78,8477   | 0.536945    | 1,862387 | 298,5891  | 65,62913   | 0.871144   | 11,73316   | 24,8341  | 24,84188   | 1,4073     | 1,8436    | 0.866961 | 1,201413  |
| 52   | CONTROL | 52   | 1.0412      | 0.1238     | 401,2625 | 106,2534  | 0.368673    | 2,712429 | 401,2625  | 91,64051   | 0.600431   | 16,1719    | 41,10303 | 41,10303   | 2,9021     | 3,0165    | 0.825447 | 1,159458  |
| 53   | CONTROL | 53   | 1.0616      | 0.1246     | 270,0443 | 76,05674  | 0.528587    | 1,891834 | 270,0443  | 62,07511   | 0.866756   | 10,68035   | 22,5533  | 22,77002   | 1,1492     | 2,4878    | 0.901048 | 1,215525  |
| 54   | CONTROL | 54   | 1.1078      | 0.1397     | 334,1758 | 101,9447  | 0.345454    | 2,89474  | 334,1758  | 68,57504   | 0.906168   | 12,39725   | 25,3453  | 25,3453    | 1,4392     | 1,9019    | 0.854939 | 1,497534  |
| 55   | CONTROL | 55   | 1.0464      | 0.1487     | 136,2482 | 56,92872  | 0.503795    | 1,984935 | 136,2482  |            |            |            |          |            |            |           |          |           |

|             |     |        |        |          |          |          |          |          |          |          |          |          |          |        |        |          |          |
|-------------|-----|--------|--------|----------|----------|----------|----------|----------|----------|----------|----------|----------|----------|--------|--------|----------|----------|
| 106 CONTROL | 106 | 1,0677 | 0,1058 | 226,3782 | 61,76117 | 0,722999 | 1,383127 | 226,3782 | 54,44135 | 0,959812 | 8,897447 | 18,05466 | 18,33727 | 1,0963 | 2,0083 | 0,969449 | 1,134453 |
| 107 CONTROL | 107 | 1,0355 | 0,1011 | 307,2343 | 73,99734 | 0,669381 | 1,493917 | 307,2343 | 66,17601 | 0,881611 | 13,1964  | 26,1367  | 26,1367  | 1,5763 | 5,1087 | 0,94935  | 1,118188 |
| 108 CONTROL | 108 | 1,0597 | 0,1003 | 347,9138 | 85,51702 | 0,5531   | 1,807991 | 347,9138 | 72,89404 | 0,822805 | 14,65745 | 28,28557 | 28,28676 | 1,9284 | 2,9648 | 0,952183 | 1,173169 |
| 109 CONTROL | 109 | 1,0273 | 0,0972 | 308,4603 | 71,03883 | 0,756513 | 1,321854 | 308,4603 | 64,11307 | 0,943009 | 11,09683 | 23,77541 | 23,77541 | 1,3552 | 4,0693 | 0,984916 | 1,108024 |
| 110 CONTROL | 110 | 1,0743 | 0,1286 | 265,203  | 78,51082 | 0,486574 | 2,055188 | 265,203  | 63,72668 | 0,81934  | 10,66523 | 25,91626 | 25,91626 | 1,5995 | 2,8253 | 0,899953 | 1,231027 |
| 111 CONTROL | 111 | 1,0401 | 0,1002 | 250,7734 | 62,21968 | 0,80504  | 1,242174 | 250,7734 | 56,97239 | 0,972578 | 9,784397 | 19,82727 | 19,82727 | 1,1282 | 3,2232 | 0,988968 | 1,093062 |
| 112 CONTROL | 112 | 1,0238 | 0,106  | 225,8438 | 57,18688 | 0,867086 | 1,153289 | 225,8438 | 53,8673  | 0,978064 | 9,520239 | 17,56035 | 18,00608 | 1,0384 | 4,7586 | 0,999165 | 1,061625 |
| 113 CONTROL | 113 | 1,0337 | 0,1195 | 175,8589 | 52,58741 | 0,794545 | 1,258581 | 175,8589 | 48,89461 | 0,924383 | 7,888138 | 17,02496 | 17,57012 | 1,1001 | 3,0019 | 0,99428  | 1,075526 |
| 114 CONTROL | 114 | 1,0325 | 0,1227 | 205,2211 | 59,85904 | 0,691509 | 1,446113 | 205,2211 | 54,75218 | 0,860258 | 9,104858 | 21,50074 | 21,50074 | 1,6544 | 2,4835 | 0,960784 | 1,093272 |
| 115 CONTROL | 115 | 1,0292 | 0,1055 | 291,7987 | 68,54911 | 0,746469 | 1,39641  | 291,7987 | 62,01179 | 0,953552 | 10,45179 | 22,24878 | 22,24878 | 1,2136 | 2,679  | 0,956583 | 1,105421 |
| 116 CONTROL | 116 | 1,0524 | 0,1521 | 181,5175 | 59,77004 | 0,595594 | 1,678995 | 181,5175 | 53,78809 | 0,788417 | 9,985426 | 21,83805 | 21,8402  | 1,7683 | 2,95   | 0,932802 | 1,111213 |
| 117 CONTROL | 117 | 1,0353 | 0,1404 | 169,2256 | 52,69858 | 0,726757 | 1,375975 | 169,2256 | 47,65631 | 0,936343 | 9,63117  | 16,63362 | 16,64511 | 1,1088 | 3,6821 | 0,949099 | 1,105805 |
| 118 CONTROL | 118 | 1,0205 | 0,1277 | 181,6433 | 53,24309 | 0,795582 | 1,256942 | 181,6433 | 49,56809 | 0,929019 | 7,934344 | 17,56035 | 17,57277 | 1,1187 | 2,2304 | 0,988058 | 1,07414  |
| 119 CONTROL | 119 | 1,0415 | 0,1344 | 142,5356 | 47,45816 | 0,777899 | 1,285514 | 142,5356 | 43,58995 | 0,942671 | 8,883422 | 14,97887 | 15,09621 | 1,1308 | 3,5269 | 0,978165 | 1,088741 |
| 120 CONTROL | 120 | 1,0195 | 0,1411 | 184,3469 | 55,79362 | 0,694937 | 1,438979 | 184,3469 | 51,69642 | 0,866811 | 9,761738 | 19,79234 | 19,79234 | 1,4504 | 2,7786 | 0,933834 | 1,079255 |
| 121 CONTROL | 121 | 1,0355 | 0,1155 | 214,4321 | 59,6766  | 0,743998 | 1,346409 | 214,4321 | 55,97789 | 0,859396 | 9,141188 | 22,02082 | 22,02177 | 1,6268 | 2,7787 | 0,983287 | 1,066074 |
| 122 CONTROL | 122 | 1,0523 | 0,1304 | 303,5562 | 84,39965 | 0,477056 | 1,000189 | 303,5562 | 72,70746 | 0,721134 | 11,12418 | 29,61842 | 29,66637 | 1,2139 | 3,9421 | 0,890845 | 1,160444 |
| 123 CONTROL | 123 | 1,0172 | 0,1076 | 239,3931 | 59,06383 | 0,856903 | 1,166993 | 239,3931 | 55,47188 | 0,977632 | 9,049291 | 18,07119 | 18,47855 | 1,0205 | 1,9704 | 0,993697 | 1,064753 |
| 124 CONTROL | 124 | 1,1375 | 0,3388 | 840,7839 | 171,8619 | 0,195716 | 5,109454 | 840,7839 | 124,4889 | 0,6822   | 22,41977 | 49,7327  | 49,83746 | 1,4403 | 2,0134 | 0,54713  | 1,380984 |
| 125 CONTROL | 125 | 1,0462 | 0,1099 | 192,9292 | 57,62748 | 0,710533 | 1,407393 | 192,9292 | 52,47    | 0,880613 | 9,282553 | 19,88426 | 19,90496 | 1,53   | 3,7513 | 0,973277 | 1,098294 |
| 126 CONTROL | 126 | 1,0215 | 0,1457 | 145,4278 | 47,40461 | 0,798643 | 1,252123 | 145,4278 | 43,81493 | 0,951947 | 7,307411 | 14,98725 | 15,09413 | 1,1159 | 2,4472 | 0,982058 | 1,081928 |
| 127 CONTROL | 127 | 1,0382 | 0,126  | 178,3424 | 53,01755 | 0,784516 | 1,274671 | 178,3424 | 48,81349 | 0,940555 | 8,780195 | 16,91195 | 16,94757 | 1,1657 | 2,4212 | 0,983959 | 1,086125 |
| 128 CONTROL | 128 | 1,0592 | 0,1135 | 281,4245 | 72,22429 | 0,626311 | 1,59665  | 281,4245 | 61,3155  | 0,940656 | 10,92362 | 21,80851 | 21,85927 | 1,1643 | 2,4291 | 0,932816 | 1,177913 |
| 129 CONTROL | 129 | 1,0541 | 0,1062 | 326,1594 | 78,46773 | 0,57796  | 1,730225 | 326,1594 | 69,67278 | 0,844332 | 12,41888 | 27,22945 | 27,22945 | 1,6007 | 1,9991 | 0,868241 | 1,126232 |
| 130 CONTROL | 130 | 1,0145 | 0,1035 | 323,0471 | 72,26738 | 0,748333 | 1,336304 | 323,0471 | 65,96062 | 0,933052 | 12,44895 | 23,09053 | 23,36518 | 1,256  | 3,5964 | 0,962729 | 1,095614 |
| 131 CONTROL | 131 | 1,0843 | 0,1097 | 332,101  | 89,41472 | 0,488735 | 2,046098 | 332,101  | 65,76833 | 0,964819 | 11,44878 | 22,34324 | 22,38161 | 1,1285 | 1,9916 | 0,936293 | 1,359541 |
| 132 CONTROL | 132 | 1,0318 | 0,1007 | 253,8856 | 63,55213 | 0,774767 | 1,290711 | 253,8856 | 58,06695 | 0,946214 | 11,4205  | 20,71131 | 20,71131 | 1,1432 | 4,9454 | 0,980807 | 1,094463 |
| 133 CONTROL | 133 | 1,0556 | 0,1093 | 217,7959 | 59,00301 | 0,765053 | 1,307099 | 217,7959 | 53,3997  | 0,959802 | 8,704699 | 17,9034  | 18,18941 | 1,131  | 1,9695 | 0,973152 | 1,104932 |
| 134 CONTROL | 134 | 1,0243 | 0,1141 | 289,3152 | 71,8445  | 0,659968 | 1,515226 | 289,3152 | 64,84571 | 0,864606 | 13,65099 | 25,79711 | 25,79711 | 1,6447 | 4,9701 | 0,936977 | 1,10793  |
| 135 CONTROL | 135 | 1,0513 | 0,1135 | 171,9292 | 55,17358 | 0,688713 | 1,451984 | 171,9292 | 51,53099 | 0,813621 | 9,627411 | 20,88589 | 20,88589 | 1,5202 | 3,2175 | 0,970378 | 1,070687 |
| 136 CONTROL | 136 | 1,0575 | 0,1251 | 146,9996 | 47,56206 | 0,800699 | 1,248909 | 146,9996 | 43,93797 | 0,955045 | 7,812748 | 15,34277 | 15,53855 | 1,1416 | 3,1651 | 0,980539 | 1,081458 |
| 137 CONTROL | 137 | 1,036  | 0,1335 | 124,7422 | 42,71915 | 0,860701 | 1,161843 | 124,7422 | 40,21665 | 0,969195 | 7,546348 | 14,03848 | 14,05938 | 1,1818 | 7,2839 | 1,002016 | 1,062225 |
| 138 CONTROL | 138 | 1,0262 | 0,1526 | 148,6972 | 52,84557 | 0,649727 | 1,539109 | 148,6972 | 48,858   | 0,782783 | 7,894539 | 20,25083 | 20,2606  | 1,8037 | 4,1717 | 0,971036 | 1,081616 |
| 139 CONTROL | 139 | 1,0458 | 0,1394 | 123,1704 | 43,57535 | 0,796419 | 1,255621 | 123,1704 | 40,27771 | 0,954083 | 7,101312 | 13,87064 | 14,00191 | 1,0792 | 3,1008 | 0,977029 | 1,081873 |
| 140 CONTROL | 140 | 1,0445 | 0,1227 | 152,4383 | 48,37518 | 0,806927 | 1,239272 | 152,4383 | 44,80918 | 0,954046 | 7,762909 | 15,07092 | 15,60817 | 1,1183 | 3,5171 | 0,98577  | 1,079582 |
| 141 CONTROL | 141 | 1,0439 | 0,1084 | 323,0471 | 77,6977  | 0,635476 | 1,737624 | 323,0471 | 66,35275 | 0,922057 | 11,51663 | 24,85371 | 24,86778 | 1,4712 | 2,1891 | 0,945018 | 1,107979 |
| 142 CONTROL | 142 | 1,0688 | 0,1618 | 254,5458 | 81,38333 | 0,38406  | 2,603762 | 254,5458 | 72,68534 | 0,605455 | 13,62633 | 28,0125  | 28,95422 | 1,71   | 2,0064 | 0,795233 | 1,119666 |
| 143 CONTROL | 143 | 1,0639 | 0,1197 | 345,3046 | 88,17872 | 0,472251 | 2,117517 | 345,3046 | 74,70385 | 0,777546 | 12,2448  | 27,67434 | 28,46846 | 1,581  | 2,241  | 0,846231 | 1,108377 |
| 144 CONTROL | 144 | 1,0455 | 0,1088 | 218,3618 | 60,83688 | 0,722614 | 1,383866 | 218,3618 | 55,32436 | 0,896506 | 10,2956  | 20,90168 | 20,91674 | 1,437  | 3,3745 | 0,974662 | 1,09964  |
| 145 CONTROL | 145 | 1,0438 | 0,126  | 198,525  | 59,47926 | 0,664747 | 1,504333 | 198,525  | 54,04917 | 0,853978 | 8,470691 | 22,04651 | 22,04651 | 1,459  | 2,4574 | 0,942676 | 1,100466 |
| 146 CONTROL | 146 | 1,1309 | 0,2049 | 218,739  | 85,55691 | 0,267792 | 3,73424  | 218,739  | 60,23826 | 0,757514 | 10,36142 | 22,09137 | 22,98525 | 1,473  | 2,8218 | 0,713136 | 1,420308 |
| 147 CONTROL | 147 | 1,0571 | 0,1399 | 161,1463 | 55,34557 | 0,615569 | 1,624512 | 161,1463 | 47,7361  | 0,888661 | 9,607589 | 17,95076 | 18,03183 | 1,4017 | 5,3519 | 0,91135  | 1,159407 |
| 148 CONTROL | 148 | 1,0491 | 0,1482 | 142,9443 | 50,22376 | 0,685033 | 1,459783 | 142,9443 | 46,05934 | 0,846722 | 7,704113 | 18,07642 | 18,07642 | 1,4509 | 4,2469 | 0,961953 | 1,090414 |
| 149 LPS     | 1   | 1,0272 | 0,1038 | 217,4501 | 56,80709 | 0,851664 | 1,174172 | 217,4501 | 53,52569 | 0,952658 | 9,732323 | 19,59842 | 19,59858 | 1,2762 | 6,4761 | 1,005783 | 1,060685 |
| 150 LPS     | 2   | 1,0207 | 0,1213 | 205,2839 | 56,64238 | 0,788656 | 1,26798  | 205,2839 | 55,51959 | 0,935237 | 8,881702 | 18,95174 | 18,95215 | 1,2684 | 2,7435 | 0,980858 | 1,0785   |
| 151 LPS     | 3   | 1,0262 | 0,1295 | 149,3889 | 46,68067 | 0,859684 | 1,163219 | 149,3889 | 44,0708  | 0,966553 | 7,944787 | 15,1966  | 15,24468 | 1,1956 | 5,0389 | 0,979796 | 1,05922  |
| 152 LPS     | 4   | 1,031  | 0,1207 | 161,7751 | 49,41365 | 0,836142 | 1,19597  | 161,7751 | 46,42381 | 0,943277 | 7,404273 | 16,88126 | 16,88126 | 1,274  | 4,6608 | 1,004275 | 1,064403 |
| 153 LPS     | 5   | 1,0354 | 0,1302 | 171,3319 | 51,42713 | 0,79585  | 1,256519 | 171,3319 | 47,58459 | 0,950857 | 8,923635 | 16,00172 | 16,13527 | 1,0934 | 3,2577 | 0,977615 | 1,080752 |
| 154 LPS     | 6   | 1,0548 | 0,1191 | 161,0834 | 51,10816 | 0,754241 | 1,325836 | 161,0834 | 48,22092 | 0,870541 | 8,762553 | 17,22142 | 17,68865 | 1,2985 | 3,8388 | 0,973263 | 1,059875 |
| 155 LPS     | 7   | 1,0678 | 0,2404 | 545,59   | 113,4034 | 0,4793   | 2,086376 | 545,59   | 97,1209  | 0,72686  | 18,05911 | 40,81867 | 40,81867 | 2,1809 | 2,9083 | 0,890949 | 1,167651 |
| 156 LPS     | 8   | 1,0872 | 0,1449 | 1180,304 | 164,6793 | 0,491873 | 2,033044 | 1180,304 | 130,2939 | 0,873686 | 21,98535 | 47,99695 | 47,99695 | 1,3655 | 1,7257 | 0,899347 | 1,263906 |
| 157 LPS     | 9   | 1,094  | 0,2613 | 608,6842 | 130,1383 | 0,328501 | 3,044134 | 608,6842 | 100,8286 | 0,752375 | 18,64755 | 41,71908 | 41,71908 | 2,1122 | 1,832  | 0,727353 | 1,290689 |
| 158 LPS     | 10  | 1,0435 | 0,112  | 223,975  | 59,29681 | 0,783445 | 1,276414 | 223,975  | 53,97445 | 0,966048 | 9,16922  | 18,63812 | 18,67387 | 1,1892 | 3,0599 | 0,978804 | 1,098609 |
| 159 LPS     | 11  | 1,042  | 0,1072 | 207,736  | 62,82074 | 0,610025 | 1,639277 | 207,736  | 58,47546 | 0,763438 | 10,65667 | 22,46741 | 22,50828 | 2,0364 | 1,5186 | 0,922215 | 1,07431  |
| 160 LPS     | 12  | 1,0841 | 0,285  | 532,1978 | 113,8619 | 0,425566 | 2,349813 | 532,1978 | 86,19012 | 0,900259 | 14,78278 | 31,63888 | 31,80551 | 1,3688 | 2,1839 | 0,824975 | 1,321055 |
| 161 LPS     | 13  | 1,0304 | 0,1079 | 1189,295 | 190,1798 | 0,304651 | 3,282447 | 1189,295 | 154,9602 | 0,622385 | 28,28872 | 66,92294 | 66,93472 | 3,2034 | 2,7564 | 0,732779 | 1,227282 |
| 162 LPS     | 14  |        |        |          |          |          |          |          |          |          |          |          |          |        |        |          |          |

|         |     |        |        |          |          |          |          |          |          |          |          |          |          |        |        |          |           |
|---------|-----|--------|--------|----------|----------|----------|----------|----------|----------|----------|----------|----------|----------|--------|--------|----------|-----------|
| 212 LPS | 64  | 1,0391 | 0,0869 | 420,502  | 86,12979 | 0,680947 | 1,468543 | 420,502  | 76,45089 | 0,904092 | 13,30085 | 28,83592 | 28,8733  | 1,4871 | 3,0267 | 0,955966 | 1,126603  |
| 213 LPS | 65  | 1,076  | 0,1102 | 334,5845 | 86,8211  | 0,467797 | 2,137678 | 334,5845 | 68,19521 | 0,904081 | 11,96525 | 23,60887 | 23,79296 | 1,2393 | 1,9003 | 0,838673 | 1,271126  |
| 214 LPS | 66  | 1,0611 | 0,119  | 313,3645 | 83,30018 | 0,521387 | 1,917962 | 313,3645 | 66,95468 | 0,87841  | 11,56059 | 24,59367 | 24,76371 | 1,4418 | 2,0759 | 0,91874  | 1,244128  |
| 215 LPS | 67  | 1,0881 | 0,2393 | 571,7456 | 115,8395 | 0,487938 | 2,049439 | 571,7456 | 88,37844 | 0,919856 | 14,21431 | 33,08342 | 33,08342 | 1,3735 | 1,7831 | 0,91131  | 1,310722  |
| 216 LPS | 68  | 1,0251 | 0,0896 | 370,1084 | 77,75124 | 0,74883  | 1,335416 | 370,1084 | 70,74832 | 0,929194 | 12,5906  | 24,60199 | 25,19152 | 1,2501 | 3,8162 | 0,97329  | 1,098984  |
| 217 LPS | 69  | 1,0472 | 0,1194 | 224,4605 | 60,12465 | 0,760161 | 1,31551  | 224,4605 | 54,98447 | 0,932974 | 9,242926 | 19,26106 | 19,36161 | 1,1403 | 1,8338 | 0,97423  | 1,093484  |
| 218 LPS | 70  | 1,0735 | 0,0844 | 423,017  | 88,37606 | 0,663817 | 1,50644  | 423,017  | 73,642   | 0,980203 | 11,95559 | 25,0308  | 25,10807 | 1,1185 | 1,6301 | 0,975327 | 1,200077  |
| 219 LPS | 71  | 1,0559 | 0,1317 | 178,311  | 57,38422 | 0,655147 | 1,526376 | 178,311  | 51,78988 | 0,835406 | 9,189238 | 20,38082 | 20,38082 | 1,6136 | 2,8627 | 0,9628   | 1,10802   |
| 220 LPS | 72  | 1,0558 | 0,0846 | 529,5571 | 100,5158 | 0,617789 | 1,618677 | 529,5571 | 84,72736 | 0,92699  | 13,87349 | 30,84291 | 30,84291 | 1,2311 | 1,5756 | 0,937964 | 1,186344  |
| 221 LPS | 73  | 1,0848 | 0,1133 | 217,5758 | 67,38156 | 0,569306 | 1,756523 | 217,5758 | 56,76048 | 0,848649 | 9,253865 | 22,16312 | 22,16312 | 1,82   | 1,7346 | 0,945384 | 1,187121  |
| 222 LPS | 74  | 1,094  | 0,1053 | 388,0904 | 105,5264 | 0,398319 | 2,510549 | 388,0904 | 73,12952 | 0,91192  | 13,24762 | 26,88085 | 26,88248 | 1,2579 | 3,8481 | 0,909518 | 1,443007  |
| 223 LPS | 75  | 1,0472 | 0,0921 | 373,4093 | 80,84628 | 0,688241 | 1,452979 | 373,4093 | 71,54738 | 0,916658 | 12,8364  | 26,82057 | 26,83429 | 1,517  | 2,4196 | 0,958663 | 1,129968  |
| 224 LPS | 76  | 1,0307 | 0,0895 | 433,5798 | 87,92801 | 0,668095 | 1,496792 | 433,5798 | 78,71314 | 0,879395 | 14,23654 | 31,49548 | 31,49548 | 1,587  | 2,8838 | 0,948013 | 1,117069  |
| 225 LPS | 77  | 1,0326 | 0,1071 | 263,7569 | 68,51667 | 0,68827  | 1,452918 | 263,7569 | 63,40374 | 0,824486 | 10,75025 | 24,30113 | 24,30129 | 1,7824 | 2,1421 | 0,974851 | 1,1080641 |
| 226 LPS | 78  | 1,0259 | 0,1214 | 311,6355 | 84,86117 | 0,457783 | 2,184441 | 311,6355 | 75,80431 | 0,681504 | 13,35949 | 31,80883 | 31,80883 | 2,5969 | 2,5118 | 0,841824 | 1,119477  |
| 227 LPS | 79  | 1,0748 | 0,1081 | 380,6712 | 91,88652 | 0,524977 | 1,904844 | 380,6712 | 73,6492  | 0,881908 | 12,95759 | 26,23754 | 26,37511 | 1,3665 | 2,4961 | 0,926584 | 1,247624  |
| 228 LPS | 80  | 1,0444 | 0,1305 | 185,5415 | 56,18387 | 0,712224 | 1,404053 | 185,5415 | 50,15209 | 0,926984 | 9,437908 | 17,92184 | 17,92535 | 1,3553 | 4,7564 | 0,964249 | 1,12027   |
| 229 LPS | 81  | 1,0459 | 0,1121 | 296,0741 | 73,29557 | 0,671524 | 1,489149 | 296,0741 | 64,74    | 0,887697 | 10,6264  | 25,53684 | 25,53684 | 1,6124 | 2,4787 | 0,969633 | 1,132153  |
| 230 LPS | 82  | 1,046  | 0,0877 | 446,689  | 89,03475 | 0,669729 | 1,493141 | 446,689  | 76,617   | 0,956235 | 13,00598 | 25,10603 | 26,09846 | 1,0138 | 2,3667 | 0,945809 | 1,162076  |
| 231 LPS | 83  | 1,1019 | 0,08   | 622,485  | 123,7553 | 0,482843 | 2,701065 | 622,485  | 95,23225 | 0,862522 | 14,71832 | 36,39074 | 36,39074 | 1,7084 | 1,859  | 0,945356 | 1,299511  |
| 232 LPS | 84  | 1,0319 | 0,0949 | 323,4558 | 72,07004 | 0,758825 | 1,31826  | 323,4558 | 64,8255  | 0,967237 | 10,3258  | 21,35034 | 21,62929 | 1,0583 | 1,6781 | 0,969676 | 1,111754  |
| 233 LPS | 85  | 1,0327 | 0,105  | 366,0845 | 83,4828  | 0,620515 | 1,611564 | 366,0845 | 73,81078 | 0,844406 | 13,56168 | 28,97404 | 28,97404 | 1,7688 | 3,4796 | 0,94006  | 1,131038  |
| 234 LPS | 86  | 1,0495 | 0,092  | 474,668  | 95,9266  | 0,670747 | 1,647318 | 474,668  | 75,57335 | 0,96616  | 13,7753  | 26,56617 | 26,90881 | 1,1135 | 2,3449 | 0,936486 | 1,220854  |
| 235 LPS | 87  | 1,0522 | 0,0937 | 523,144  | 102,6539 | 0,578188 | 1,729541 | 523,144  | 84,6517  | 0,917401 | 14,71387 | 30,73878 | 30,74082 | 1,3906 | 2,2234 | 0,926802 | 1,212662  |
| 236 LPS | 88  | 1,0453 | 0,0881 | 428,5813 | 86,85674 | 0,684101 | 1,461772 | 428,5813 | 76,76287 | 0,913988 | 13,1492  | 28,30945 | 28,30956 | 1,2859 | 1,9554 | 0,958263 | 1,131494  |
| 237 LPS | 89  | 1,0441 | 0,0857 | 472,6875 | 91,03032 | 0,691174 | 1,446814 | 472,6875 | 81,41011 | 0,896245 | 13,22924 | 28,37433 | 29,062   | 1,0949 | 1,4973 | 0,964219 | 1,11817   |
| 238 LPS | 90  | 1,0647 | 0,0873 | 402,4556 | 86,32695 | 0,657325 | 1,521317 | 402,4556 | 73,71892 | 0,942176 | 13,64502 | 25,19977 | 25,2975  | 1,1774 | 3,1033 | 0,956716 | 1,171028  |
| 239 LPS | 91  | 1,0653 | 0,0941 | 380,9227 | 83,56879 | 0,653179 | 1,530974 | 380,9227 | 71,01902 | 0,949067 | 11,41004 | 24,6989  | 24,72706 | 1,1094 | 1,3614 | 0,952959 | 1,17671   |
| 240 LPS | 92  | 1,0573 | 0,0924 | 313,6789 | 72,77926 | 0,707264 | 1,413898 | 313,6789 | 65,41016 | 0,921307 | 11,4409  | 22,49539 | 22,59913 | 1,1659 | 2,0268 | 0,950391 | 1,11266   |
| 241 LPS | 93  | 1,0568 | 0,1054 | 400,508  | 89,56152 | 0,572485 | 1,746771 | 400,508  | 72,91301 | 0,946696 | 12,15846 | 24,43273 | 24,56743 | 1,1193 | 1,5776 | 0,912402 | 1,228334  |
| 242 LPS | 94  | 1,0809 | 0,1055 | 402,8344 | 93,05408 | 0,535154 | 1,868622 | 402,8344 | 74,12684 | 0,921266 | 13,37399 | 26,10782 | 26,39608 | 1,2685 | 2,5394 | 0,915405 | 1,255336  |
| 243 LPS | 95  | 1,1206 | 0,1805 | 949,2103 | 160,6612 | 0,413094 | 2,420759 | 949,2103 | 112,7002 | 0,939123 | 18,47275 | 40,50051 | 40,50051 | 1,1607 | 1,6111 | 0,893919 | 1,425562  |
| 244 LPS | 96  | 1,0479 | 0,1019 | 271,8047 | 65,37553 | 0,782619 | 1,277761 | 271,8047 | 59,35571 | 0,969486 | 9,609184 | 20,50768 | 20,51255 | 1,1536 | 1,5915 | 0,979297 | 1,101419  |
| 245 LPS | 97  | 1,0927 | 0,1025 | 458,6666 | 104,5989 | 0,464053 | 2,154927 | 458,6666 | 79,69745 | 0,90744  | 12,98991 | 28,42415 | 28,55073 | 1,127  | 1,3942 | 0,880877 | 1,31245   |
| 246 LPS | 98  | 1,1309 | 0,1218 | 733,5836 | 150,1624 | 0,358069 | 2,792755 | 733,5836 | 99,32482 | 0,933107 | 16,70436 | 35,73695 | 35,73695 | 1,1973 | 1,9126 | 0,875582 | 1,510767  |
| 247 LPS | 99  | 1,0595 | 0,1179 | 200,3169 | 59,05337 | 0,699858 | 1,428862 | 200,3169 | 52,99875 | 0,920715 | 8,601755 | 18,2314  | 18,63876 | 1,2163 | 2,3174 | 0,969554 | 1,12939   |
| 248 LPS | 100 | 1,0719 | 0,0848 | 347,5366 | 80,2156  | 0,657664 | 1,520533 | 347,5366 | 68,72541 | 0,924646 | 13,75176 | 24,69573 | 24,74158 | 1,2353 | 4,3437 | 0,968973 | 1,16719   |
| 249 LPS | 101 | 1,0859 | 0,122  | 586,1124 | 111,577  | 0,550937 | 1,815089 | 586,1124 | 87,83933 | 0,95458  | 14,25135 | 29,71379 | 29,87592 | 1,1043 | 1,2079 | 0,931238 | 1,202739  |
| 250 LPS | 102 | 1,1024 | 0,1054 | 467,0603 | 114,9583 | 0,379104 | 2,6378   | 467,0603 | 80,72106 | 0,900759 | 13,84032 | 28,24441 | 28,70938 | 1,323  | 1,8953 | 0,853604 | 1,424143  |
| 251 LPS | 103 | 1,0425 | 0,1028 | 299,9409 | 71,26436 | 0,708639 | 1,411156 | 299,9409 | 63,50115 | 0,934721 | 10,59739 | 22,27066 | 22,37566 | 1,2516 | 3,3804 | 0,954827 | 1,122253  |
| 252 LPS | 104 | 1,0552 | 0,0993 | 420,9421 | 93,60603 | 0,572685 | 1,746161 | 420,9421 | 76,81468 | 0,896486 | 12,1669  | 28,65546 | 28,66    | 1,5361 | 1,8745 | 0,948618 | 1,128596  |
| 253 LPS | 105 | 1,0379 | 0,0844 | 463,3821 | 87,78103 | 0,717655 | 1,393426 | 463,3821 | 78,40993 | 0,947124 | 12,83559 | 27,1375  | 27,3866  | 1,1678 | 2,0031 | 0,949661 | 1,119514  |
| 254 LPS | 106 | 1,0718 | 0,1217 | 613,997  | 111,4835 | 0,57729  | 1,732233 | 613,997  | 93,66172 | 0,879532 | 15,4916  | 36,03089 | 36,03089 | 1,5063 | 2,0847 | 0,929906 | 1,190278  |
| 255 LPS | 107 | 1,0479 | 0,1144 | 262,7823 | 71,05656 | 0,624375 | 1,6016   | 262,7823 | 62,02087 | 0,858479 | 10,07177 | 24,45587 | 24,45587 | 1,6221 | 2,0833 | 0,95466  | 1,145688  |
| 256 LPS | 108 | 1,061  | 0,0919 | 410,6622 | 88,03191 | 0,638992 | 1,564965 | 410,6622 | 74,29711 | 0,934868 | 12,62972 | 26,74486 | 26,7919  | 1,3263 | 2,4248 | 0,95958  | 1,184863  |
| 257 LPS | 109 | 1,0569 | 0,1091 | 224,4605 | 61,59645 | 0,716147 | 1,396362 | 224,4605 | 54,1552  | 0,961766 | 8,967578 | 18,05553 | 18,35154 | 1,1129 | 1,8099 | 0,963305 | 1,137406  |
| 258 LPS | 110 | 1,0639 | 0,1261 | 179,0026 | 55,65408 | 0,696003 | 1,436775 | 179,0026 | 48,84094 | 0,942976 | 8,754113 | 17,7305  | 17,73574 | 1,3411 | 2,7959 | 0,958377 | 1,139496  |
| 259 LPS | 111 | 1,0658 | 0,0979 | 309,5921 | 73,77926 | 0,679223 | 1,472271 | 309,5921 | 63,9061  | 0,952609 | 10,31842 | 22,44502 | 22,51947 | 1,2219 | 1,3277 | 0,950345 | 1,154495  |
| 260 LPS | 112 | 1,1382 | 0,1058 | 472,3102 | 117,5695 | 0,375684 | 2,661813 | 472,3102 | 79,01598 | 0,95062  | 12,54915 | 26,83404 | 27,33784 | 1,103  | 1,4088 | 0,874933 | 1,487921  |
| 261 LPS | 113 | 1,0466 | 0,0945 | 434,5858 | 88,44734 | 0,66406  | 1,505887 | 434,5858 | 75,2403  | 0,964682 | 12,42479 | 24,9805  | 25,45284 | 1,0484 | 1,6315 | 0,951244 | 1,175531  |
| 262 LPS | 114 | 1,0787 | 0,113  | 308,4603 | 80,61028 | 0,558649 | 1,790034 | 308,4603 | 65,5225  | 0,902876 | 10,76128 | 23,87041 | 24,06546 | 1,4233 | 1,6633 | 0,936506 | 1,230269  |
| 263 LPS | 115 | 1,0684 | 0,1223 | 345,3989 | 85,99025 | 0,545961 | 1,831634 | 345,3989 | 67,89112 | 0,941683 | 11,08163 | 23,7913  | 23,78996 | 1,2752 | 1,9739 | 0,930099 | 1,262691  |
| 264 LPS | 116 | 1,0945 | 0,1061 | 324,9019 | 88,08227 | 0,497778 | 2,008929 | 324,9019 | 66,15589 | 0,932878 | 10,43301 | 24,84358 | 24,84358 | 1,4209 | 1,4913 | 0,945912 | 1,331435  |
| 265 LPS | 117 | 1,0793 | 0,0912 | 334,4588 | 81,18298 | 0,612114 | 1,633683 | 334,4588 | 67,69652 | 0,917106 | 10,82424 | 25,07972 | 25,07972 | 1,3946 | 1,6563 | 0,959865 | 1,199129  |
| 266 LPS | 118 | 1,0622 | 0,1188 | 129,8979 | 44,67482 | 0,810945 | 1,233129 | 129,8979 | 41,32491 | 0,955846 | 7,064397 | 13,74543 | 14,05108 | 1,0106 | 2,3814 | 0,99153  | 1,081063  |
| 267 LPS | 119 | 1,0792 | 0,0764 | 531,4748 | 101,4683 | 0,622283 | 1,606985 | 531,4748 | 83,45972 | 0,958823 | 13,44112 | 29,12824 | 29,20041 | 1,1466 | 1,4368 | 0,959304 | 1,215775  |
| 268 LPS |     |        |        |          |          |          |          |          |          |          |          |          |          |        |        |          |           |

|     |      |    |        |        |          |          |          |          |          |          |          |          |          |          |        |        |          |           |
|-----|------|----|--------|--------|----------|----------|----------|----------|----------|----------|----------|----------|----------|----------|--------|--------|----------|-----------|
| 318 | KYNA | 39 | 1,0405 | 0,0966 | 278,9409 | 68,95727 | 0,722455 | 1,38417  | 278,9409 | 63,46681 | 0,870219 | 10,52395 | 24,55594 | 24,58488 | 1,7046 | 2,5775 | 0,980052 | 1,086509  |
| 319 | KYNA | 40 | 1,0513 | 0,1177 | 205,9127 | 58,65567 | 0,730163 | 1,369556 | 205,9127 | 52,99188 | 0,921455 | 8,811028 | 19,8534  | 19,86832 | 1,321  | 3,0528 | 0,97084  | 1,10688   |
| 320 | KYNA | 41 | 1,0295 | 0,1288 | 144,3904 | 46,42996 | 0,838756 | 1,192242 | 144,3904 | 43,45784 | 0,960753 | 7,695408 | 15,63906 | 15,63906 | 1,2456 | 2,8658 | 0,996516 | 1,068391  |
| 321 | KYNA | 42 | 1,0383 | 0,1107 | 183,4352 | 52,19716 | 0,844025 | 1,1848   | 183,4352 | 48,49718 | 0,980075 | 9,183954 | 16,08303 | 16,11216 | 1,064  | 6,0964 | 0,997601 | 1,076293  |
| 322 | KYNA | 43 | 1,0493 | 0,1064 | 197,1417 | 55,16312 | 0,807373 | 1,238558 | 197,1417 | 50,50968 | 0,971044 | 8,812642 | 17,68878 | 17,1695  | 1,1538 | 3,2946 | 0,991708 | 1,09213   |
| 323 | KYNA | 44 | 1,0568 | 0,1132 | 198,1477 | 55,79362 | 0,786944 | 1,270738 | 198,1477 | 50,78365 | 0,965497 | 8,678209 | 17,52452 | 17,53199 | 1,1711 | 2,7963 | 0,983817 | 1,098653  |
| 324 | KYNA | 45 | 1,0527 | 0,1088 | 209,1821 | 58,04291 | 0,764189 | 1,308577 | 209,1821 | 52,16963 | 0,965825 | 8,466099 | 18,00496 | 18,01669 | 1,1859 | 1,8633 | 0,979411 | 1,11258   |
| 325 | KYNA | 46 | 1,0166 | 0,1133 | 193,2121 | 54,96578 | 0,798667 | 1,252087 | 193,2121 | 51,38711 | 0,919466 | 9,906312 | 18,5502  | 18,56372 | 1,2979 | 3,669  | 0,993817 | 1,069641  |
| 326 | KYNA | 47 | 1,0332 | 0,1272 | 197,5504 | 57,68883 | 0,732184 | 1,365777 | 197,5504 | 51,98624 | 0,918567 | 8,316028 | 19,54059 | 19,54255 | 1,4422 | 1,7075 | 0,98154  | 1,109684  |
| 327 | KYNA | 48 | 1,029  | 0,135  | 184,1897 | 56,03706 | 0,71659  | 1,395498 | 184,1897 | 50,7253  | 0,89955  | 8,790195 | 18,10683 | 18,52009 | 1,26   | 2,8674 | 0,97218  | 1,104716  |
| 328 | KYNA | 49 | 1,0741 | 0,1379 | 202,3289 | 64,58759 | 0,561575 | 1,780706 | 202,3289 | 53,99404 | 0,872119 | 8,991011 | 20,71131 | 20,71131 | 1,5999 | 1,5933 | 0,92138  | 1,196198  |
| 329 | KYNA | 50 | 1,0432 | 0,123  | 595,6378 | 133,8848 | 0,307707 | 3,24985  | 595,6378 | 109,5285 | 0,623933 | 20,50702 | 45,78624 | 45,86601 | 3,0222 | 1,9371 | 0,736898 | 1,222374  |
| 330 | KYNA | 51 | 1,0566 | 0,1337 | 235,715  | 69,45567 | 0,557677 | 1,793152 | 235,715  | 57,63284 | 0,891778 | 9,872535 | 20,97002 | 20,97002 | 1,4132 | 2,748  | 0,908242 | 1,205141  |
| 331 | KYNA | 52 | 1,0853 | 0,1151 | 233,5773 | 67,57145 | 0,612141 | 1,633612 | 233,5773 | 55,98934 | 0,936331 | 8,932589 | 20,13016 | 20,17516 | 1,3423 | 1,7811 | 0,952221 | 1,206863  |
| 332 | KYNA | 53 | 1,09   | 0,1274 | 352,5036 | 92,23369 | 0,426299 | 2,345769 | 352,5036 | 73,06989 | 0,829652 | 12,90702 | 25,77028 | 26,46037 | 1,258  | 1,2904 | 0,818693 | 1,262267  |
| 333 | KYNA | 54 | 1,1354 | 0,2545 | 607,0809 | 139,7927 | 0,336809 | 2,969045 | 607,0809 | 90,06429 | 0,940483 | 14,68702 | 31,24864 | 31,26387 | 1,0709 | 1,3302 | 0,862773 | 1,525144  |
| 334 | KYNA | 55 | 1,0592 | 0,1118 | 141,6553 | 45,99663 | 0,837082 | 1,194626 | 141,6553 | 42,97456 | 0,963873 | 7,207819 | 14,55629 | 14,6691  | 1,1079 | 2,9985 | 0,994896 | 1,070322  |
| 335 | KYNA | 56 | 1,0749 | 0,1135 | 285,92   | 75,89947 | 0,576795 | 1,733718 | 285,92   | 63,79358 | 0,882877 | 10,40337 | 24,38637 | 24,38637 | 1,4126 | 1,9456 | 0,924794 | 1,189767  |
| 336 | KYNA | 57 | 1,0802 | 0,0898 | 550,6199 | 117,5296 | 0,457962 | 2,183587 | 550,6199 | 92,09707 | 0,815774 | 15,96427 | 36,33367 | 36,33367 | 2,0151 | 2,7467 | 0,914245 | 1,276149  |
| 337 | KYNA | 58 | 1,0514 | 0,1088 | 255,2688 | 65,98085 | 0,708162 | 1,412106 | 255,2688 | 58,02044 | 0,952895 | 9,35039  | 20,82333 | 20,82333 | 1,1993 | 1,7004 | 0,961084 | 1,1372    |
| 338 | KYNA | 59 | 1,0745 | 0,1296 | 308,3346 | 83,85514 | 0,464957 | 2,150739 | 308,3346 | 67,02578 | 0,862478 | 11,11078 | 24,83853 | 24,83855 | 1,2485 | 1,3438 | 0,843801 | 1,251088  |
| 339 | KYNA | 60 | 1,1259 | 0,0898 | 593,4058 | 128,147  | 0,393735 | 2,539782 | 593,4058 | 90,49342 | 0,910599 | 14,10415 | 32,9253  | 32,94612 | 1,2324 | 1,5807 | 0,86708  | 1,416092  |
| 340 | KYNA | 61 | 1,0389 | 0,1038 | 322,0997 | 59,16773 | 0,820607 | 1,21861  | 322,0997 | 54,85456 | 0,969301 | 8,733067 | 18,44739 | 18,4711  | 1,1124 | 1,3085 | 0,984965 | 1,078629  |
| 341 | KYNA | 62 | 1,072  | 0,1048 | 331,5382 | 75,96028 | 0,637629 | 1,568311 | 331,5382 | 66,09021 | 0,925055 | 10,74232 | 22,86684 | 23,28441 | 1,1322 | 1,7446 | 0,91054  | 1,149342  |
| 342 | KYNA | 63 | 1,0442 | 0,1142 | 173,8783 | 52,25798 | 0,779568 | 1,282761 | 173,8783 | 48,4908  | 0,929258 | 9,357004 | 16,37362 | 16,81982 | 1,0565 | 4,5025 | 0,974327 | 1,077689  |
| 343 | KYNA | 64 | 1,0183 | 0,1084 | 277,0233 | 69,20798 | 0,708405 | 1,411622 | 277,0233 | 64,84484 | 0,827894 | 10,49617 | 26,52947 | 26,52947 | 1,7097 | 2,7987 | 0,974694 | 1,067286  |
| 344 | KYNA | 65 | 1,0242 | 0,1472 | 117,3545 | 41,23245 | 0,870909 | 1,148226 | 117,3545 | 38,77066 | 0,981077 | 7,216613 | 12,81021 | 12,90147 | 1,0672 | 6,2027 | 1,004018 | 1,063496  |
| 345 | KYNA | 66 | 1,0103 | 0,1184 | 193,7465 | 53,67642 | 0,847232 | 1,180314 | 193,7465 | 50,24695 | 0,964326 | 9,385689 | 17,34057 | 17,34796 | 1,1834 | 4,8364 | 1,002596 | 1,068252  |
| 346 | KYNA | 67 | 1,0355 | 0,1277 | 156,1793 | 48,60798 | 0,825968 | 1,210701 | 156,1793 | 45,31537 | 0,955744 | 8,396986 | 15,8636  | 15,8636  | 1,1258 | 4,8732 | 0,994364 | 1,07266   |
| 347 | KYNA | 68 | 1,031  | 0,1393 | 230,8737 | 75,53759 | 0,461451 | 2,167079 | 230,8737 | 66,71776 | 0,650726 | 11,52846 | 30,12828 | 30,12828 | 2,7254 | 3,8418 | 0,907544 | 1,131281  |
| 348 | KYNA | 69 | 1,0505 | 0,0959 | 321,6639 | 73,81489 | 0,710976 | 1,406516 | 321,6639 | 64,88337 | 0,960163 | 10,35895 | 22,1936  | 22,43074 | 1,1668 | 1,5208 | 0,958366 | 1,137655  |
| 349 | KYNA | 70 | 1,0295 | 0,1016 | 349,9887 | 87,73369 | 0,52417  | 1,907779 | 349,9887 | 81,20339 | 0,666984 | 15,11596 | 35,37979 | 35,37979 | 2,6137 | 3,2272 | 0,917363 | 1,080419  |
| 350 | KYNA | 71 | 1,0385 | 0,1206 | 156,5879 | 48,29645 | 0,840045 | 1,190413 | 156,5879 | 44,99599 | 0,971897 | 7,076365 | 15,64509 | 15,6789  | 1,2169 | 1,383  | 0,995784 | 1,07335   |
| 351 | KYNA | 72 | 1,0477 | 0,105  | 228,2959 | 59,63351 | 0,791064 | 1,264121 | 228,2959 | 54,82952 | 0,954286 | 9,752199 | 19,28145 | 19,33379 | 1,2081 | 3,4241 | 0,980584 | 1,087617  |
| 352 | KYNA | 73 | 1,0899 | 0,2238 | 726,0072 | 141,9055 | 0,375291 | 2,664601 | 726,0072 | 109,7694 | 0,75716  | 19,01048 | 45,4361  | 45,4361  | 2,1472 | 2,1722 | 0,828354 | 1,29276   |
| 353 | KYNA | 74 | 1,0633 | 0,1253 | 75,7029  | 75,3445  | 0,553173 | 1,807754 | 75,7029  | 61,41115 | 0,918663 | 9,801082 | 23,4217  | 23,4217  | 1,3722 | 1,6552 | 0,960385 | 1,226886  |
| 354 | KYNA | 75 | 1,0548 | 0,1902 | 671,3382 | 106,8839 | 0,70955  | 1,409343 | 671,3382 | 94,25422 | 0,949619 | 15,29789 | 33,98062 | 33,98062 | 1,308  | 1,9045 | 0,960852 | 1,133996  |
| 355 | KYNA | 76 | 1,0652 | 0,2091 | 553,9837 | 104,8853 | 0,575898 | 1,73642  | 553,9837 | 89,4986  | 0,869109 | 15,73197 | 33,9334  | 33,99553 | 1,6944 | 1,6092 | 0,910056 | 1,171921  |
| 356 | KYNA | 77 | 1,0494 | 0,2256 | 615,6318 | 120,356  | 0,502812 | 1,988814 | 615,6318 | 106,8148 | 0,678059 | 19,34814 | 46,91115 | 46,91115 | 2,845  | 2,7504 | 0,941448 | 1,126773  |
| 357 | KYNA | 78 | 1,0835 | 0,0975 | 360,1429 | 88,97394 | 0,519439 | 1,925153 | 360,1429 | 70,82028 | 0,902337 | 12,15392 | 24,54314 | 25,19566 | 1,1683 | 1,8494 | 0,908607 | 1,256334  |
| 358 | KYNA | 79 | 1,0142 | 0,1331 | 160,3918 | 47,98493 | 0,869346 | 1,15029  | 160,3918 | 45,57137 | 0,970527 | 7,464504 | 15,30995 | 15,31122 | 1,06   | 1,4099 | 0,99314  | 1,052962  |
| 359 | KYNA | 80 | 1,0436 | 0,1043 | 200,6627 | 55,1305  | 0,813268 | 1,229607 | 200,6627 | 51,71078 | 0,943005 | 9,633777 | 17,98885 | 17,98885 | 1,0814 | 2,9058 | 0,98026  | 1,066132  |
| 360 | KYNA | 81 | 1,045  | 0,1135 | 212,263  | 56,69273 | 0,81995  | 1,219586 | 212,263  | 52,38645 | 0,971954 | 9,921068 | 18,01369 | 18,01369 | 1,123  | 3,2244 | 0,988004 | 1,082022  |
| 361 | KYNA | 82 | 1,0389 | 0,1    | 400,4766 | 86,62376 | 0,622451 | 1,606553 | 400,4766 | 74,65827 | 0,902872 | 13,37117 | 27,52113 | 27,5733  | 1,4057 | 3,1681 | 0,928095 | 1,160264  |
| 362 | KYNA | 83 | 1,036  | 0,1242 | 350,4602 | 94,23528 | 0,391744 | 2,552684 | 350,4602 | 84,63565 | 0,614817 | 16,69108 | 36,39938 | 36,39938 | 2,7851 | 1,4624 | 0,789917 | 1,131428  |
| 363 | KYNA | 84 | 1,0409 | 0,104  | 318,0486 | 74,10869 | 0,708372 | 1,411689 | 318,0486 | 65,92089 | 0,919723 | 10,99449 | 25,05715 | 25,05715 | 1,4717 | 2,3388 | 0,973411 | 1,124206  |
| 364 | KYNA | 85 | 1,0284 | 0,1072 | 207,9561 | 55,07713 | 0,86329  | 1,158359 | 207,9561 | 51,49083 | 0,985647 | 9,550089 | 17,31426 | 17,31832 | 1,1077 | 5,188  | 1,002116 | 1,069649  |
| 365 | KYNA | 86 | 1,0629 | 0,127  | 317,64   | 82,31507 | 0,498376 | 2,006517 | 317,64   | 65,53073 | 0,825641 | 13,33466 | 26,96959 | 26,96989 | 1,5088 | 2,1473 | 0,846002 | 1,183866  |
| 366 | KYNA | 87 | 1,0431 | 0,1186 | 159,2915 | 48,96259 | 0,828054 | 1,207651 | 159,2915 | 45,69559 | 0,958636 | 7,814113 | 16,21348 | 16,25199 | 1,264  | 3,4372 | 0,991711 | 1,1071495 |
| 367 | KYNA | 88 | 1,0616 | 0,1416 | 177,808  | 58,5445  | 0,874881 | 1,702183 | 177,808  | 50,47345 | 0,877071 | 9,233298 | 18,50863 | 18,68842 | 1,3023 | 2,4418 | 0,901167 | 1,159907  |
| 368 | KYNA | 89 | 1,0455 | 0,1427 | 142,2527 | 47,92394 | 0,750811 | 1,331893 | 142,2527 | 43,657   | 0,937912 | 7,911152 | 16,08303 | 16,08303 | 1,2395 | 2,9682 | 0,964641 | 1,097738  |
| 369 | KYNA | 90 | 1,0387 | 0,1309 | 190,0684 | 55,6289  | 0,753824 | 1,265669 | 190,0684 | 50,04278 | 0,953754 | 9,254504 | 17,56035 | 17,56206 | 1,1571 | 3,5244 | 0,976679 | 1,111627  |
| 370 | KYNA | 91 | 1,0715 | 0,1138 | 344,2671 | 82,76613 | 0,539729 | 1,852783 | 344,2671 | 69,39594 | 0,898332 | 12,09566 | 25,57927 | 25,57927 | 1,2563 | 1,8979 | 0,854625 | 1,192665  |
| 371 | KYNA | 92 | 1,0344 | 0,1323 | 273,4395 | 72,69025 | 0,584439 | 1,711043 | 273,4395 | 64,07418 | 0,83696  | 10,97881 | 23,33431 | 23,82674 | 1,5515 | 1,7335 | 0,898712 | 1,13447   |
| 372 | KYNA | 93 | 1,0342 | 0,1243 | 154,8903 | 48,43599 | 0,820057 | 1,219428 | 154,8903 | 45,03858 | 0,959543 | 7,306223 | 16,02429 | 16,02429 | 1,2115 | 2,4    |          |           |



|     |          |    |        |        |          |          |          |          |          |          |          |          |          |          |        |        |          |          |
|-----|----------|----|--------|--------|----------|----------|----------|----------|----------|----------|----------|----------|----------|----------|--------|--------|----------|----------|
| 424 | LPS+KYNA | 38 | 1,0728 | 0,1162 | 229,0818 | 64,29379 | 0,649768 | 1,539011 | 229,0818 | 55,3592  | 0,939335 | 9,355745 | 19,68404 | 19,8077  | 1,2617 | 2,1535 | 0,933031 | 1,161393 |
| 425 | LPS+KYNA | 39 | 1,1222 | 0,111  | 307,6115 | 95,04238 | 0,400732 | 2,495431 | 307,6115 | 65,19071 | 0,909496 | 11,62904 | 22,99502 | 23,17394 | 1,2596 | 2,646  | 0,936433 | 1,457846 |
| 426 | LPS+KYNA | 40 | 1,2027 | 0,0846 | 472,4373 | 142,2897 | 0,328096 | 3,047887 | 572,4373 | 86,40085 | 0,96361  | 13,74789 | 30,49851 | 30,49851 | 1,182  | 1,2963 | 0,923444 | 1,646855 |
| 427 | LPS+KYNA | 41 | 1,0793 | 0,1049 | 276,8347 | 74,62801 | 0,602858 | 1,658764 | 276,8347 | 61,08871 | 0,932198 | 10,1683  | 22,66177 | 22,66177 | 1,3683 | 2,8037 | 0,95137  | 1,221634 |
| 428 | LPS+KYNA | 42 | 1,1429 | 0,1211 | 484,0991 | 132,0699 | 0,289315 | 3,456442 | 484,0991 | 80,76225 | 0,932668 | 13,34305 | 28,13567 | 28,13567 | 1,1536 | 1,3964 | 0,829534 | 1,635292 |
| 429 | LPS+KYNA | 43 | 1,1324 | 0,1049 | 286,2029 | 86,29876 | 0,460375 | 2,712142 | 286,2029 | 60,79533 | 0,97956  | 9,780213 | 20,3167  | 20,3167  | 1,0937 | 1,6191 | 0,953317 | 1,424224 |
| 430 | LPS+KYNA | 44 | 1,0985 | 0,1051 | 268,3152 | 76,01809 | 0,561399 | 1,779552 | 268,3152 | 58,43734 | 0,987356 | 9,401241 | 19,23821 | 19,23821 | 1,0596 | 1,5857 | 0,963093 | 1,300848 |
| 431 | LPS+KYNA | 45 | 1,1021 | 0,118  | 259,9844 | 80,04043 | 0,467784 | 2,137739 | 259,9844 | 61,67599 | 0,858864 | 10,83193 | 20,86631 | 22,23222 | 1,1752 | 2,1925 | 0,917291 | 1,297757 |
| 432 | LPS+KYNA | 46 | 1,0799 | 0,1087 | 224,4291 | 72,37128 | 0,514327 | 1,944288 | 224,4291 | 57,1641  | 0,849633 | 9,488174 | 23,4452  | 23,4452  | 1,7982 | 3,3662 | 0,955176 | 1,256138 |
| 433 | LPS+KYNA | 47 | 1,0518 | 0,1172 | 232,477  | 62,08014 | 0,73691  | 1,357018 | 232,477  | 56,16282 | 0,926172 | 9,593564 | 20,94301 | 20,94301 | 1,3653 | 4,3026 | 0,972143 | 1,10536  |
| 434 | LPS+KYNA | 48 | 1,0381 | 0,101  | 244,5174 | 62,03706 | 0,788744 | 1,267838 | 244,5174 | 56,1564  | 0,974363 | 9,159965 | 19,29287 | 19,29287 | 1,1129 | 1,9388 | 0,987915 | 1,104719 |
| 435 | LPS+KYNA | 49 | 1,0795 | 0,1022 | 368,1907 | 88,1     | 0,560487 | 1,784162 | 368,1907 | 72,53385 | 0,879429 | 12,82842 | 24,94651 | 26,50122 | 1,1795 | 3,1459 | 0,940232 | 1,214605 |
| 436 | LPS+KYNA | 50 | 1,0455 | 0,111  | 248,6356 | 64,73457 | 0,719194 | 1,390445 | 248,6356 | 58,16973 | 0,923376 | 9,662943 | 21,48977 | 21,48977 | 1,3221 | 1,8748 | 0,964597 | 1,112857 |
| 437 | LPS+KYNA | 51 | 1,0256 | 0,113  | 190,6028 | 55,36348 | 0,763132 | 1,310389 | 190,6028 | 50,0544  | 0,955992 | 9,496649 | 17,39035 | 17,44777 | 1,1913 | 3,4012 | 0,976579 | 1,106066 |
| 438 | LPS+KYNA | 52 | 1,0227 | 0,1076 | 243,8258 | 61,27748 | 0,797583 | 1,253788 | 243,8258 | 56,5583  | 0,957848 | 9,199131 | 19,88663 | 19,93121 | 1,2573 | 2,088  | 0,977437 | 1,083439 |
| 439 | LPS+KYNA | 53 | 1,0517 | 0,0943 | 380,2311 | 82,47234 | 0,662066 | 1,510423 | 380,2311 | 70,94337 | 0,949366 | 11,86002 | 25,44929 | 25,44929 | 1,2211 | 2,235  | 0,942456 | 1,16251  |
| 440 | LPS+KYNA | 54 | 1,0529 | 0,0945 | 486,5646 | 117,3649 | 0,455262 | 2,196538 | 546,5646 | 60,70196 | 0,907012 | 14,23539 | 33,46934 | 33,46934 | 1,4264 | 1,8827 | 0,913033 | 1,348712 |
| 441 | LPS+KYNA | 55 | 1,0964 | 0,1087 | 387,1787 | 97,92535 | 0,454769 | 2,198919 | 387,1787 | 73,82986 | 0,8926   | 11,74493 | 28,42746 | 28,45963 | 1,5125 | 2,9688 | 0,896314 | 1,326365 |
| 442 | LPS+KYNA | 56 | 1,0574 | 0,0982 | 277,7778 | 69,63085 | 0,688501 | 1,452431 | 277,7778 | 59,87039 | 0,973829 | 11,88507 | 19,91034 | 19,91034 | 1,0279 | 4,4934 | 0,956315 | 1,163027 |
| 443 | LPS+KYNA | 57 | 1,1225 | 0,0982 | 363,318  | 92,73511 | 0,482247 | 2,073626 | 363,318  | 73,4423  | 0,846445 | 12,28816 | 29,60516 | 29,60516 | 1,7249 | 2,0229 | 0,983667 | 1,262686 |
| 444 | LPS+KYNA | 58 | 1,0562 | 0,1152 | 254,3257 | 67,61436 | 0,656471 | 1,523297 | 254,3257 | 59,23514 | 0,910838 | 10,13317 | 22,21979 | 22,21979 | 1,4154 | 2,6882 | 0,939601 | 1,141457 |
| 445 | LPS+KYNA | 59 | 1,0555 | 0,0967 | 373,7551 | 80,55975 | 0,690284 | 1,448678 | 373,7551 | 69,90883 | 0,96102  | 11,10718 | 23,4217  | 23,55115 | 1,1151 | 1,4744 | 0,953823 | 1,152354 |
| 446 | LPS+KYNA | 60 | 1,0344 | 0,1079 | 289,378  | 70,84894 | 0,698715 | 1,4312   | 289,378  | 62,83268 | 0,921094 | 10,28762 | 23,47199 | 23,47232 | 1,4001 | 2,8197 | 0,964476 | 1,127581 |
| 447 | LPS+KYNA | 61 | 1,0616 | 0,088  | 474,7309 | 99,60496 | 0,554996 | 1,801815 | 474,7309 | 83,35514 | 0,858603 | 15,84578 | 31,71975 | 31,72628 | 1,7714 | 4,2781 | 0,922985 | 1,194947 |
| 448 | LPS+KYNA | 62 | 1,0306 | 0,1304 | 271,8362 | 69,72429 | 0,646433 | 1,546952 | 271,8362 | 61,27057 | 0,90994  | 12,97594 | 21,4077  | 21,92023 | 1,2822 | 3,5738 | 0,919972 | 1,137974 |
| 449 | LPS+KYNA | 63 | 1,0977 | 0,0941 | 499,5662 | 111,6807 | 0,456889 | 2,188714 | 499,5662 | 84,21436 | 0,885177 | 13,51252 | 31,52739 | 31,60842 | 1,4579 | 2,1908 | 0,907747 | 1,326148 |
| 450 | LPS+KYNA | 64 | 1,0665 | 0,1019 | 326,5681 | 77,30018 | 0,634425 | 1,57623  | 326,5681 | 67,7183  | 0,894893 | 11,85273 | 24,86129 | 24,9578  | 1,2115 | 2,4517 | 0,923758 | 1,141496 |
| 451 | LPS+KYNA | 65 | 1,0372 | 0,1187 | 161,8379 | 48,93741 | 0,839133 | 1,191706 | 161,8379 | 45,73115 | 0,972446 | 6,785718 | 15,75223 | 15,75642 | 1,1598 | 3,1068 | 0,988151 | 1,070111 |
| 452 | LPS+KYNA | 66 | 1,1101 | 0,1208 | 264,7628 | 81,64894 | 0,442898 | 2,257858 | 264,7628 | 61,16732 | 0,889258 | 9,797571 | 21,23296 | 22,00495 | 1,2747 | 1,6822 | 0,887438 | 1,334846 |
| 453 | LPS+KYNA | 67 | 1,0463 | 0,1083 | 270,6416 | 70,48688 | 0,653115 | 1,531125 | 270,6416 | 64,44181 | 0,818971 | 11,79491 | 24,88594 | 25,04035 | 1,7063 | 1,7696 | 0,954118 | 1,093807 |
| 454 | LPS+KYNA | 68 | 1,0921 | 0,203  | 659,4864 | 127,7924 | 0,476573 | 2,098313 | 659,4864 | 99,66067 | 0,834387 | 15,93784 | 41,17142 | 41,17142 | 1,7717 | 2,0092 | 0,939127 | 1,282275 |
| 455 | LPS+KYNA | 69 | 1,0679 | 0,1019 | 459,2953 | 101,7977 | 0,507213 | 1,971559 | 459,2953 | 80,56567 | 0,889204 | 13,36142 | 29,55466 | 29,65887 | 1,5521 | 1,675  | 0,910678 | 1,263537 |
| 456 | LPS+KYNA | 70 | 1,0625 | 0,1217 | 169,3514 | 52,93156 | 0,736166 | 1,35839  | 169,3514 | 47,42161 | 0,946336 | 7,470567 | 17,06739 | 17,06739 | 1,1813 | 1,5818 | 0,969185 | 1,11619  |
| 457 | LPS+KYNA | 71 | 1,0441 | 0,1258 | 288,6864 | 77,29273 | 0,519025 | 1,926689 | 288,6864 | 66,8806  | 0,811027 | 12,4367  | 25,31739 | 25,33273 | 1,5729 | 1,4652 | 0,854732 | 1,155682 |
| 458 | LPS+KYNA | 72 | 1,0917 | 0,1343 | 166,2391 | 58,55195 | 0,565668 | 1,767821 | 166,2391 | 49,00894 | 0,869745 | 8,090106 | 17,15374 | 18,00191 | 1,2539 | 2,2587 | 0,893328 | 1,19472  |
| 459 | LPS+KYNA | 73 | 1,0776 | 0,1165 | 264,9829 | 72,99433 | 0,558671 | 1,878961 | 264,9829 | 61,70963 | 0,874423 | 9,815071 | 22,38401 | 22,68968 | 1,3201 | 1,8912 | 0,882938 | 1,182868 |
| 460 | LPS+KYNA | 74 | 1,0263 | 0,1069 | 250,5533 | 62,09006 | 0,800116 | 1,248259 | 250,5533 | 57,35807 | 0,957019 | 9,377819 | 19,67766 | 19,75548 | 1,1151 | 2,2563 | 0,980928 | 1,082509 |
| 461 | LPS+KYNA | 75 | 1,0954 | 0,1226 | 289,0637 | 85,30621 | 0,444045 | 2,272497 | 289,0637 | 65,95202 | 0,835116 | 11,32379 | 25,57927 | 25,59355 | 1,881  | 1,8842 | 0,881566 | 1,293459 |
| 462 | LPS+KYNA | 76 | 1,1073 | 0,1082 | 381,2685 | 103,406  | 0,408357 | 2,448839 | 381,2685 | 77,32828 | 0,801242 | 13,42083 | 30,80262 | 30,82264 | 1,9451 | 2,5977 | 0,911362 | 1,373234 |
| 463 | LPS+KYNA | 77 | 1,0296 | 0,1284 | 175,2616 | 52,69858 | 0,785222 | 1,273525 | 175,2616 | 49,04011 | 0,915751 | 7,901135 | 18,49165 | 18,49165 | 1,421  | 2,5355 | 0,990135 | 1,074582 |
| 464 | LPS+KYNA | 78 | 1,1492 | 0,1012 | 746,5985 | 154,5216 | 0,348083 | 2,873188 | 746,5985 | 99,65186 | 0,944769 | 16,34113 | 34,28777 | 34,77885 | 1,2185 | 1,8313 | 0,885764 | 1,150615 |
| 465 | LPS+KYNA | 79 | 1,0799 | 0,1223 | 370,8314 | 95,45035 | 0,44952  | 2,24594  | 370,8314 | 72,68837 | 0,881975 | 11,91158 | 28,19651 | 28,19651 | 1,4576 | 2,4879 | 0,878857 | 1,313145 |
| 466 | LPS+KYNA | 80 | 1,1292 | 0,1179 | 357,4393 | 100,8986 | 0,388393 | 2,574709 | 357,4393 | 73,29142 | 0,836191 | 11,8262  | 29,1773  | 29,1773  | 1,6828 | 2,4729 | 0,880299 | 1,376677 |
| 467 | LPS+KYNA | 81 | 1,0293 | 0,1173 | 308,0831 | 72,6828  | 0,683119 | 1,463873 | 308,0831 | 66,89126 | 0,865244 | 13,26323 | 25,66209 | 25,66209 | 1,4751 | 2,4498 | 0,932143 | 1,086581 |
| 468 | LPS+KYNA | 82 | 1,0971 | 0,1016 | 485,4824 | 115,4879 | 0,373709 | 2,765875 | 485,4824 | 82,42926 | 0,897884 | 14,16188 | 29,03745 | 29,03745 | 1,2179 | 1,9085 | 0,817004 | 1,041055 |
| 469 | LPS+KYNA | 83 | 1,1506 | 0,2415 | 777,8784 | 171,5828 | 0,279172 | 3,582024 | 777,8784 | 103,2247 | 0,91739  | 16,97885 | 34,89126 | 35,77973 | 1,1042 | 1,379  | 0,84081  | 1,662227 |
| 470 | LPS+KYNA | 84 | 1,1166 | 0,1344 | 461,1187 | 121,6349 | 0,293449 | 3,407749 | 461,1187 | 81,93154 | 0,863217 | 13,69202 | 28,65163 | 30,20514 | 1,2159 | 1,6831 | 0,74925  | 1,484592 |
| 471 | LPS+KYNA | 85 | 1,0675 | 0,0893 | 316,7912 | 73,03741 | 0,728045 | 1,373541 | 316,7912 | 63,99965 | 0,971913 | 10,81949 | 21,53507 | 21,74082 | 1,1473 | 2,5295 | 0,975588 | 1,141216 |
| 472 | LPS+KYNA | 86 | 1,0893 | 0,1095 | 490,0093 | 106,0353 | 0,501178 | 1,9953   | 490,0093 | 79,75486 | 0,968054 | 13,13498 | 27,98106 | 27,98106 | 1,17   | 1,5105 | 0,915122 | 1,329515 |
| 473 | LPS+KYNA | 87 | 1,0682 | 0,1354 | 221,6626 | 67,61436 | 0,567035 | 1,763561 | 221,6626 | 57,81824 | 0,833244 | 9,889149 | 22,77869 | 22,85223 | 1,8074 | 3,0255 | 0,903648 | 1,16943  |
| 474 | LPS+KYNA | 88 | 1,0672 | 0,1291 | 408,2415 | 98,22642 | 0,448669 | 2,228815 | 408,2415 | 85,45268 | 0,702547 | 15,69172 | 35,98417 | 36,02846 | 2,6444 | 2,4865 | 0,843832 | 1,149483 |
| 475 | LPS+KYNA | 89 | 1,0881 | 0,0955 | 475,1396 | 104,1048 | 0,510825 | 1,957618 | 475,1396 | 79,57823 | 0,942849 | 13,91444 | 26,64594 | 27,60904 | 1,0919 | 2,5044 | 0,927222 | 1,308207 |
| 476 | LPS+KYNA | 90 | 1,0457 | 0,1062 | 242,4111 | 64,13954 | 0,717044 | 1,394615 | 242,4111 | 56,79387 | 0,944407 | 9,096613 | 20,25472 | 20,28521 | 1,1447 | 1,7829 | 0,968357 | 1,129339 |
| 477 | LPS+KYNA | 91 | 1,0442 | 0,067  | 585,6722 | 100,694  | 0,708451 | 1,411153 | 585,6722 | 90,44762 | 0,899642 | 16,21966 | 33,7653  | 33,81399 | 1,5753 | 3,6024 | 0,976006 | 1,113285 |
| 478 | LPS+KYNA | 92 | 1,0424 | 0,089  | 343,104  |          |          |          |          |          |          |          |          |          |        |        |          |          |

|              |     |        |        |          |          |          |          |          |          |          |          |          |          |        |        |          |          |
|--------------|-----|--------|--------|----------|----------|----------|----------|----------|----------|----------|----------|----------|----------|--------|--------|----------|----------|
| 530 LPS+KYNA | 144 | 1,0649 | 0,0828 | 499,8491 | 97,48156 | 0,625084 | 1,599784 | 499,8491 | 81,63232 | 0,942593 | 13,33824 | 28,72613 | 28,85463 | 1,1741 | 1,5479 | 0,94566  | 1,194154 |
| 531 LPS+KYNA | 145 | 1,1367 | 0,2554 | 675,2678 | 151,7707 | 0,307885 | 3,24797  | 675,2678 | 100,4331 | 0,841262 | 17,91379 | 37,57025 | 38,25764 | 1,6292 | 2,3933 | 0,835754 | 1,511162 |
| 532 LPS+KYNA | 146 | 1,0347 | 0,1036 | 253,7913 | 63,16188 | 0,783776 | 1,275874 | 253,7913 | 57,48807 | 0,965008 | 9,615195 | 19,92216 | 20,04366 | 1,1491 | 2,3042 | 0,980429 | 1,098695 |
| 533 LPS+KYNA | 147 | 1,0717 | 0,1255 | 373,1264 | 98,67748 | 0,401815 | 2,488709 | 373,1264 | 74,39791 | 0,847118 | 12,74509 | 27,20865 | 27,24929 | 1,383  | 1,9419 | 0,834443 | 1,326348 |
| 534 LPS+KYNA | 148 | 1,1487 | 0,1134 | 305,3795 | 100,289  | 0,339397 | 2,946398 | 305,3795 | 68,91291 | 0,808069 | 11,30571 | 25,23094 | 25,47707 | 1,5415 | 2,5969 | 0,889541 | 1,455301 |
| 535 LPS+KYNA | 149 | 1,0757 | 0,1237 | 217,011  | 66,81915 | 0,567251 | 1,762888 | 217,011  | 53,75256 | 0,943722 | 9,813954 | 18,24174 | 18,41855 | 1,182  | 3,4552 | 0,928727 | 1,243021 |
| 536 LPS+KYNA | 150 | 1,0464 | 0,1231 | 198,0849 | 61,78635 | 0,633726 | 1,579669 | 198,0849 | 56,19076 | 0,788372 | 9,911277 | 23,70323 | 23,70323 | 1,8729 | 4,7445 | 0,971909 | 1,099582 |
| 537 LPS+KYNA | 151 | 1,0332 | 0,1214 | 175,8274 | 51,0117  | 0,843023 | 1,186208 | 175,8274 | 47,68004 | 0,971903 | 7,915035 | 16,22025 | 16,22168 | 1,1186 | 2,896  | 0,928488 | 1,069876 |
| 538 LPS+KYNA | 152 | 1,0399 | 0,0837 | 371,4916 | 76,73032 | 0,777613 | 1,285988 | 371,4916 | 69,78074 | 0,95871  | 10,81872 | 24,9402  | 24,9402  | 1,1879 | 1,5728 | 0,980706 | 1,099592 |
| 539 LPS+KYNA | 153 | 1,0586 | 0,0758 | 477,183  | 89,76933 | 0,72068  | 1,387579 | 477,183  | 78,42652 | 0,974919 | 14,6027  | 25,73855 | 26,29402 | 1,0287 | 3,2279 | 0,968509 | 1,14463  |
| 540 LPS+KYNA | 154 | 1,0495 | 0,1072 | 365,8958 | 86,88936 | 0,567685 | 1,761539 | 365,8958 | 72,19729 | 0,882115 | 11,81573 | 27,92707 | 27,94785 | 1,3665 | 1,7349 | 0,932125 | 1,203499 |
| 541 LPS+KYNA | 155 | 1,1866 | 0,2275 | 1379,301 | 297,9076 | 0,160586 | 6,227211 | 1379,301 | 137,9347 | 0,911006 | 22,67062 | 49,59502 | 49,97706 | 1,4173 | 1,4866 | 0,822245 | 2,159772 |
| 542 LPS+KYNA | 156 | 1,0909 | 0,2318 | 627,6407 | 126,9007 | 0,445687 | 2,243725 | 627,6407 | 94,76553 | 0,878255 | 15,76989 | 37,26991 | 37,26991 | 1,7001 | 2,0589 | 0,909992 | 1,339102 |
| 543 LPS+KYNA | 157 | 1,0734 | 0,2296 | 604,3459 | 114,4241 | 0,53762  | 1,860051 | 604,3459 | 91,0522  | 0,916039 | 14,5767  | 34,17988 | 34,17988 | 1,4076 | 1,6792 | 0,926862 | 1,256687 |
| 544 LPS+KYNA | 158 | 1,0377 | 0,0948 | 280,2299 | 66,02394 | 0,797591 | 1,253775 | 280,2299 | 60,86303 | 0,950641 | 9,827394 | 21,68998 | 21,70771 | 1,3238 | 1,8222 | 0,987323 | 1,084795 |
| 545 LPS+KYNA | 159 | 1,0441 | 0,0929 | 410,2221 | 85,08369 | 0,656975 | 1,522127 | 410,2221 | 74,00535 | 0,939973 | 13,90463 | 25,98229 | 25,98229 | 1,1939 | 2,5924 | 0,922599 | 1,14892  |
| 546 LPS+KYNA | 160 | 1,0464 | 0,1184 | 185,6672 | 55,33511 | 0,746626 | 1,339358 | 185,6672 | 49,70766 | 0,944536 | 8,77773  | 17,80216 | 17,81018 | 1,2423 | 3,7873 | 0,979851 | 1,113365 |
| 547 LPS+KYNA | 161 | 1,0389 | 0,1177 | 233,0429 | 63,59504 | 0,694797 | 1,43927  | 233,0429 | 56,89479 | 0,904691 | 10,51738 | 21,86323 | 21,86323 | 1,4039 | 4,4233 | 0,959531 | 1,117666 |
| 548 LPS+KYNA | 162 | 1,0258 | 0,1276 | 172,9981 | 50,11259 | 0,866781 | 1,153694 | 172,9981 | 47,07596 | 0,980963 | 8,32945  | 15,66016 | 15,67553 | 1,0947 | 5,5323 | 1,001272 | 1,064505 |
| 549 LPS+KYNA | 163 | 1,0293 | 0,1158 | 206,2271 | 58,12908 | 0,749766 | 1,33375  | 206,2271 | 53,86777 | 0,893094 | 8,587996 | 21,10823 | 21,10823 | 1,4509 | 1,8077 | 0,977591 | 1,079107 |
| 550 LPS+KYNA | 164 | 1,0403 | 0,0848 | 330,7806 | 71,78369 | 0,784594 | 1,274544 | 330,7806 | 65,91516 | 0,956707 | 12,08496 | 23,1456  | 23,15238 | 1,1533 | 3,0662 | 0,972629 | 1,089032 |
| 551 LPS+KYNA | 165 | 1,0585 | 0,1626 | 1215,576 | 156,3984 | 0,587185 | 1,703042 | 1215,576 | 128,2459 | 0,928763 | 20,47204 | 46,38381 | 46,53745 | 1,3693 | 1,5425 | 0,940259 | 1,21952  |
| 552 LPS+KYNA | 166 | 1,0849 | 0,2074 | 571,4313 | 112,0353 | 0,531867 | 1,888171 | 571,4313 | 89,61009 | 0,894252 | 14,9762  | 31,8108  | 32,51626 | 1,4027 | 2,2636 | 0,929691 | 1,250253 |
| 553 LPS+KYNA | 167 | 1,0711 | 0,1264 | 585,1378 | 111,9745 | 0,529546 | 1,880411 | 585,1378 | 93,03151 | 0,945886 | 16,6399  | 36,24011 | 36,24011 | 1,8132 | 1,8021 | 0,920731 | 1,203619 |
| 554 LPS+KYNA | 168 | 1,0892 | 0,2111 | 788,7556 | 141,8447 | 0,421342 | 2,373369 | 788,7556 | 110,1439 | 0,817017 | 18,78117 | 43,14016 | 43,14016 | 1,6514 | 2,0816 | 0,855281 | 1,287812 |
| 555 LPS+KYNA | 169 | 1,0739 | 0,0928 | 468,2549 | 102,955  | 0,510372 | 1,959354 | 468,2549 | 80,30988 | 0,912334 | 13,86975 | 30,71216 | 30,71216 | 1,3995 | 2,7356 | 0,919369 | 1,281971 |
| 556 LPS+KYNA | 170 | 1,0457 | 0,1085 | 288,6236 | 70,64113 | 0,693015 | 1,442971 | 288,6236 | 61,89055 | 0,946875 | 10,22291 | 21,38346 | 21,58915 | 1,1761 | 2,1421 | 0,953491 | 1,141388 |
| 557 LPS+KYNA | 171 | 1,0347 | 0,091  | 487,18   | 96,22039 | 0,628905 | 1,590065 | 487,18   | 81,74348 | 0,916205 | 13,34268 | 29,55945 | 29,62223 | 1,3974 | 1,4808 | 0,951087 | 1,171702 |
| 558 LPS+KYNA | 172 | 1,0746 | 0,0894 | 524,4329 | 105,6628 | 0,544313 | 1,83718  | 524,4329 | 86,61754 | 0,878391 | 13,66521 | 33,58326 | 33,58326 | 1,5498 | 2,1912 | 0,921382 | 1,219877 |
| 559 LPS+KYNA | 173 | 1,0554 | 0,0853 | 521,9493 | 102,6895 | 0,586741 | 1,704331 | 521,9493 | 87,56677 | 0,85538  | 14,29996 | 35,10548 | 35,12191 | 1,674  | 2,7436 | 0,943323 | 1,1727   |
| 560 LPS+KYNA | 174 | 1,0467 | 0,1085 | 258,0667 | 66,27465 | 0,721325 | 1,386338 | 258,0667 | 59,32236 | 0,921252 | 10,26706 | 22,56723 | 22,56723 | 1,3997 | 2,8074 | 0,976976 | 1,117195 |
| 561 LPS+KYNA | 175 | 1,0557 | 0,1149 | 316,8855 | 81,47677 | 0,554328 | 1,803987 | 316,8855 | 68,89784 | 0,838882 | 11,62686 | 28,05007 | 28,05007 | 1,8127 | 2,1731 | 0,924107 | 1,182574 |
| 562 LPS+KYNA | 176 | 1,1395 | 0,1084 | 313,1445 | 96,45337 | 0,391514 | 2,554186 | 313,1445 | 64,32743 | 0,950959 | 10,57222 | 22,9156  | 22,93899 | 1,2412 | 1,7527 | 0,92561  | 1,099413 |
| 563 LPS+KYNA | 177 | 1,0416 | 0,0951 | 325,4678 | 71,55816 | 0,77759  | 1,286025 | 325,4678 | 64,71521 | 0,976573 | 10,16674 | 21,75367 | 21,7577  | 1,0812 | 1,5877 | 0,973534 | 1,105739 |
| 564 LPS+KYNA | 178 | 1,0657 | 0,1236 | 606,4836 | 106,0961 | 0,639968 | 1,562578 | 606,4836 | 86,69457 | 0,968801 | 14,22504 | 29,38025 | 29,45007 | 1,0655 | 1,1545 | 0,94521  | 1,196196 |
| 565 LPS+KYNA | 179 | 1,0886 | 0,0969 | 442,4765 | 104,0723 | 0,47456  | 2,107214 | 442,4765 | 76,58346 | 0,948047 | 12,63619 | 26,8475  | 26,85282 | 1,2252 | 2,3506 | 0,924405 | 1,35894  |
| 566 LPS+KYNA | 180 | 1,032  | 0,1231 | 249,7359 | 65,83404 | 0,694097 | 1,440781 | 249,7359 | 59,81915 | 0,877021 | 11,4689  | 22,53936 | 22,53936 | 1,3533 | 2,417  | 0,95885  | 1,100551 |
| 567 LPS+KYNA | 181 | 1,0826 | 0,1127 | 294,4709 | 78,42482 | 0,542944 | 1,887121 | 294,4709 | 63,4777  | 0,918353 | 10,39229 | 21,9264  | 22,44872 | 1,1323 | 1,3838 | 0,902423 | 1,235471 |
| 568 LPS+KYNA | 182 | 1,0587 | 0,096  | 242,0024 | 62,59947 | 0,760824 | 1,314364 | 242,0024 | 56,11972 | 0,965602 | 9,047411 | 19,40496 | 19,43319 | 1,1411 | 1,4938 | 0,980385 | 1,115463 |
| 569 LPS+KYNA | 183 | 1,0537 | 0,1002 | 306,7627 | 75,29415 | 0,647776 | 1,543743 | 306,7627 | 64,38186 | 0,930004 | 11,19365 | 23,22966 | 23,23021 | 1,3106 | 2,5203 | 0,952654 | 1,169493 |
| 570 LPS+KYNA | 184 | 1,0671 | 0,0876 | 599,5674 | 120,8041 | 0,464277 | 2,153885 | 599,5674 | 96,21124 | 0,813927 | 16,46317 | 37,95858 | 37,95858 | 1,7692 | 2,1274 | 0,989276 | 1,255598 |
| 571 LPS+KYNA | 185 | 1,0513 | 0,116  | 242,0967 | 63,48085 | 0,715042 | 1,398519 | 242,0967 | 57,38422 | 0,923875 | 9,42383  | 19,33356 | 19,80293 | 1,0492 | 1,5286 | 0,947115 | 1,106242 |
| 572 LPS+KYNA | 186 | 1,0428 | 0,1244 | 129,4263 | 43,47145 | 0,86169  | 1,16051  | 129,4263 | 40,68879 | 0,982387 | 6,761933 | 13,56933 | 13,60605 | 1,0858 | 2,626  | 1,001214 | 1,068389 |
| 573 LPS+KYNA | 187 | 1,0459 | 0,1241 | 144,1449 | 42,42535 | 0,869371 | 1,150257 | 124,1449 | 39,73968 | 0,987847 | 7,112074 | 12,94447 | 12,94762 | 1,0156 | 4,1201 | 1,003039 | 1,067582 |
| 574 LPS+KYNA | 188 | 1,0722 | 0,1231 | 433,1397 | 105,0323 | 0,391978 | 2,551166 | 433,1397 | 83,38108 | 0,782893 | 14,69206 | 34,87638 | 34,87638 | 1,875  | 2,0356 | 0,974455 | 1,259665 |
| 575 LPS+KYNA | 189 | 1,0588 | 0,1524 | 154,6074 | 53,62305 | 0,641052 | 1,559937 | 154,6074 | 46,24363 | 0,908523 | 9,032518 | 17,87353 | 17,87353 | 1,4833 | 5,3159 | 0,94876  | 1,159577 |
| 576 LPS+KYNA | 190 | 1,0347 | 0,1115 | 391,0455 | 96,79326 | 0,445525 | 2,244545 | 391,0455 | 85,68489 | 0,669311 | 15,3303  | 35,63124 | 35,63124 | 2,5356 | 2,1267 | 0,849425 | 1,129642 |
| 577 LPS+KYNA | 191 | 1,0754 | 0,1061 | 379,1623 | 91,28103 | 0,511483 | 1,955099 | 379,1623 | 73,27837 | 0,887326 | 12,50512 | 28,23105 | 28,23144 | 1,4819 | 2,5152 | 0,894453 | 1,245675 |
| 578 LPS+KYNA | 192 | 1,1423 | 0,1318 | 338,1998 | 109,8142 | 0,304203 | 3,287282 | 338,1998 | 70,0491  | 0,866119 | 11,5131  | 26,87209 | 26,87209 | 1,3743 | 2,0154 | 0,863172 | 1,567675 |
| 579 LPS+KYNA | 193 | 1,0292 | 0,1083 | 274,7284 | 66,62926 | 0,758783 | 1,3179   | 274,7284 | 59,70372 | 0,968524 | 10,22262 | 20,397   | 20,62696 | 1,1412 | 2,4838 | 0,957471 | 1,115998 |
| 580 LPS+KYNA | 194 | 1,0668 | 0,1134 | 309,6549 | 78,63989 | 0,59038  | 1,693825 | 309,6549 | 64,2797  | 0,941759 | 10,47801 | 21,91493 | 22,1911  | 1,0741 | 1,8432 | 0,938274 | 1,223402 |
| 581 LPS+KYNA | 195 | 1,0521 | 0,125  | 146,9996 | 48,00266 | 0,79584  | 1,256534 | 146,9996 | 43,80465 | 0,962688 | 8,575816 | 15,5352  | 15,5352  | 1,2091 | 8,0018 | 0,927279 | 1,095835 |
| 582 LPS+KYNA | 196 | 1,0562 | 0,1496 | 194,1238 | 61,18103 | 0,593769 | 1,684157 | 194,1238 | 51,86796 | 0,906755 | 8,098954 | 19,34901 | 19,35924 | 1,2826 | 1,854  | 0,911093 | 1,179553 |
| 583 LPS+KYNA | 197 | 1,0458 | 0,1347 | 129,5206 | 44,53528 | 0,81006  | 1,234477 | 129,5206 | 41,41059 | 0,94913  | 6,500975 | 14,25734 | 14,36241 | 1,178  | 1,9208 | 0,987136 | 1,075457 |
| 584 LPS+KYNA | 198 | 1,0798 | 0,1303 | 201,26   | 64,50904 | 0,569589 | 1,755653 | 201,26   | 52,81014 | 0,906843 | 8,832128 | 19,32706 | 19,33074 | 1,2344 | 2,6737 | 0,937207 | 1,221528 |

|     |        |    |        |        |          |          |          |          |          |          |          |          |          |          |        |        |          |          |
|-----|--------|----|--------|--------|----------|----------|----------|----------|----------|----------|----------|----------|----------|----------|--------|--------|----------|----------|
| 636 | SZR104 | 35 | 1,0878 | 0,2369 | 1010,67  | 164,0353 | 0,35032  | 2,85453  | 1010,67  | 127,8773 | 0,776662 | 24,65005 | 49,99402 | 49,99402 | 1,6743 | 2,0072 | 0,7422   | 1,282756 |
| 637 | SZR104 | 36 | 1,1279 | 0,2263 | 591,6453 | 136,4216 | 0,371851 | 2,689247 | 591,6453 | 89,25853 | 0,933193 | 15,08252 | 31,44853 | 31,97559 | 1,2581 | 2,0787 | 0,930818 | 1,528388 |
| 638 | SZR104 | 37 | 1,0744 | 0,2251 | 549,8654 | 109,8142 | 0,529521 | 1,888499 | 549,8654 | 89,89165 | 0,85512  | 14,6372  | 35,89145 | 35,89145 | 1,715  | 2,625  | 0,924132 | 1,212628 |
| 639 | SZR104 | 38 | 1,1111 | 0,2795 | 1643,56  | 238,6527 | 0,173605 | 5,760203 | 1643,56  | 175,7007 | 0,669034 | 33,15645 | 70,17559 | 70,1771  | 2,217  | 1,2991 | 0,47874  | 1,358291 |
| 640 | SZR104 | 39 | 1,1062 | 0,0958 | 382,2117 | 95,78723 | 0,49364  | 2,025769 | 382,2117 | 71,10768 | 0,949906 | 11,96743 | 24,68363 | 24,70973 | 1,2268 | 2,0139 | 0,943    | 1,347073 |
| 641 | SZR104 | 40 | 1,0924 | 0,2184 | 772,0625 | 144,9576 | 0,412727 | 2,422908 | 772,0625 | 110,4229 | 0,795632 | 19,1723  | 45,43748 | 45,43748 | 1,8645 | 2,9876 | 0,893888 | 1,312703 |
| 642 | SZR104 | 41 | 1,0362 | 0,0792 | 381,0171 | 75,84911 | 0,820849 | 1,21825  | 381,0171 | 70,20486 | 0,971448 | 13,49759 | 23,33161 | 23,3683  | 1,0468 | 5,1379 | 0,963034 | 1,080397 |
| 643 | SZR104 | 42 | 1,0666 | 0,2157 | 577,0585 | 106,0278 | 0,602313 | 1,660266 | 577,0585 | 89,68741 | 0,901501 | 15,4319  | 31,9764  | 32,1174  | 1,2542 | 2,4062 | 0,933755 | 1,182193 |
| 644 | SZR104 | 43 | 1,1834 | 0,2006 | 1081,466 | 233,4018 | 0,213564 | 4,682435 | 1081,466 | 123,5115 | 0,892185 | 20,23014 | 46,28339 | 46,28472 | 1,345  | 1,7393 | 0,85608  | 1,891126 |
| 645 | SZR104 | 44 | 1,1288 | 0,3138 | 660,7439 | 158,1138 | 0,248376 | 4,026161 | 660,7439 | 99,4295  | 0,838325 | 16,40154 | 37,08514 | 37,25702 | 1,399  | 1,5558 | 0,747835 | 1,588747 |
| 646 | SZR104 | 45 | 1,1698 | 0,23   | 1743,342 | 292,0858 | 0,165476 | 6,043155 | 1743,342 | 159,498  | 0,861155 | 27,45885 | 61,88858 | 61,88858 | 1,3792 | 1,8062 | 0,644414 | 1,831282 |
| 647 | SZR104 | 46 | 1,1475 | 0,2841 | 820,8843 | 180,0578 | 0,209997 | 4,761968 | 820,8843 | 115,9809 | 0,766865 | 19,44129 | 47,41473 | 47,41473 | 1,5942 | 2,3038 | 0,660003 | 1,552479 |
| 648 | SZR104 | 47 | 1,0755 | 0,2881 | 512,5182 | 107,8512 | 0,449597 | 2,224214 | 512,5182 | 86,66426 | 0,857509 | 13,99809 | 32,73378 | 32,73378 | 1,2156 | 1,6279 | 0,811998 | 1,244472 |
| 649 | SZR104 | 48 | 1,1003 | 0,255  | 899,0682 | 165,0707 | 0,313362 | 3,191198 | 899,0682 | 113,4559 | 0,877705 | 18,9217  | 39,59621 | 40,7255  | 1,325  | 1,3965 | 0,757561 | 1,454934 |
| 650 | SZR104 | 49 | 1,0744 | 0,2065 | 1124,063 | 160,7755 | 0,450072 | 2,221867 | 1124,063 | 124,4192 | 0,912484 | 22,02353 | 45,2864  | 45,29406 | 1,3023 | 2,6792 | 0,82361  | 1,292208 |
| 651 | SZR104 | 50 | 1,1055 | 0,2615 | 465,8657 | 108,5176 | 0,412458 | 2,424489 | 465,8657 | 83,18101 | 0,8461   | 16,15261 | 31,91489 | 31,92776 | 1,449  | 2,444  | 0,829678 | 1,304595 |
| 652 | SZR104 | 51 | 1,0509 | 0,1951 | 999,1323 | 144,5525 | 0,538538 | 1,856879 | 999,1323 | 127,7005 | 0,769826 | 25,46262 | 52,77378 | 52,77378 | 1,8612 | 3,8036 | 0,896262 | 1,318194 |
| 653 | SZR104 | 52 | 1,0547 | 0,0929 | 560,6798 | 115,08   | 0,488375 | 2,047606 | 560,6798 | 92,07787 | 0,831025 | 16,61066 | 36,40456 | 36,40456 | 1,7375 | 2,269  | 0,91797  | 1,249811 |
| 654 | SZR104 | 53 | 1,1215 | 0,2172 | 948,7387 | 170,2147 | 0,335532 | 2,980345 | 948,7387 | 115,4562 | 0,894379 | 21,3305  | 41,43477 | 41,8431  | 1,346  | 2,5221 | 0,815401 | 1,47428  |
| 655 | SZR104 | 54 | 1,0574 | 0,2123 | 1293,54  | 196,9901 | 0,319246 | 3,132385 | 1293,54  | 162,3742 | 0,616531 | 30,07067 | 72,34043 | 72,34043 | 3,0187 | 2,6199 | 0,762121 | 1,213186 |
| 656 | SZR104 | 55 | 1,0988 | 0,1395 | 452,725  | 119,1349 | 0,282708 | 3,537215 | 452,725  | 82,08718 | 0,844293 | 14,2166  | 29,25961 | 30,11573 | 1,2193 | 1,5323 | 0,705298 | 1,451322 |
| 657 | SZR104 | 56 | 1,1304 | 0,3125 | 1559,246 | 229,3855 | 0,142748 | 7,00535  | 1559,246 | 155,0114 | 0,81545  | 27,08637 | 55,03456 | 55,57812 | 1,1073 | 1,2941 | 0,383334 | 1,477978 |
| 658 | SZR104 | 57 | 1,0415 | 0,1006 | 299,0921 | 69,07589 | 0,772715 | 1,294137 | 299,0921 | 61,95443 | 0,979196 | 11,043   | 20,57959 | 20,65206 | 1,0623 | 2,8334 | 0,980795 | 1,114947 |
| 659 | SZR104 | 58 | 1,0497 | 0,175  | 903,1865 | 125,8294 | 0,688421 | 1,452599 | 903,1865 | 110,3385 | 0,932251 | 18,20027 | 39,80881 | 40,13752 | 1,354  | 2,0666 | 0,960355 | 1,140395 |
| 660 | SZR104 | 59 | 1,0566 | 0,1537 | 1317,778 | 161,9757 | 0,598654 | 1,670413 | 1317,778 | 131,9035 | 0,951785 | 22,33516 | 46,42582 | 46,43278 | 1,172  | 1,9225 | 0,948471 | 1,227986 |
| 661 | SZR104 | 60 | 1,0411 | 0,1959 | 698,154  | 107,8083 | 0,72279  | 1,383528 | 698,154  | 97,65426 | 0,91998  | 15,80566 | 36,69656 | 36,74032 | 1,4133 | 2,1014 | 0,957538 | 1,10398  |
| 662 | SZR104 | 61 | 1,0497 | 0,175  | 903,1865 | 125,8294 | 0,688421 | 1,452599 | 903,1865 | 110,3385 | 0,932251 | 18,20027 | 39,80881 | 40,13752 | 1,354  | 2,0666 | 0,960355 | 1,140395 |
| 663 | SZR104 | 62 | 1,0697 | 0,1198 | 240,8392 | 68,23759 | 0,623409 | 1,604083 | 240,8392 | 56,14894 | 0,959961 | 10,11661 | 19,88663 | 19,88663 | 1,2383 | 3,2049 | 0,959144 | 1,215296 |
| 664 | SZR104 | 63 | 1,0401 | 0,1172 | 259,7643 | 67,7539  | 0,667281 | 1,49862  | 259,7643 | 58,53576 | 0,952679 | 9,659911 | 20,4355  | 20,45491 | 1,254  | 2,1722 | 0,9384   | 1,157479 |
| 665 | SZR104 | 64 | 1,0577 | 0,1033 | 362,8464 | 83,15337 | 0,627327 | 1,594065 | 362,8464 | 69,22466 | 0,951504 | 12,13461 | 24,00176 | 24,00176 | 1,1228 | 2,1851 | 0,951308 | 1,20121  |
| 666 | SZR104 | 65 | 1,1148 | 0,1899 | 2035,455 | 301,2668 | 0,214905 | 6,563215 | 2035,455 | 181,752  | 0,774306 | 31,33335 | 70,27296 | 70,27296 | 1,6107 | 2,5539 | 0,762568 | 1,655751 |
| 667 | SZR104 | 66 | 1,0766 | 0,114  | 263,1281 | 72,69025 | 0,567766 | 1,761288 | 263,1281 | 60,60372 | 0,900281 | 10,36167 | 22,60413 | 22,71488 | 1,48   | 1,7979 | 0,907288 | 1,199435 |
| 668 | SZR104 | 67 | 1,0852 | 0,1614 | 182,3663 | 65,92004 | 0,434282 | 2,302652 | 182,3663 | 55,24199 | 0,750958 | 10,7347  | 22,96629 | 22,96629 | 2,0435 | 3,024  | 0,823479 | 1,193296 |
| 669 | SZR104 | 68 | 1,1294 | 0,2271 | 1102,183 | 213,0482 | 0,266102 | 3,757961 | 1102,183 | 126,8153 | 0,861231 | 20,16209 | 51,1352  | 51,1352  | 1,7417 | 2,1722 | 0,872048 | 1,679988 |
| 670 | SZR104 | 69 | 1,1018 | 0,1079 | 351,4033 | 90,19202 | 0,496665 | 2,013431 | 351,4033 | 68,85844 | 0,931325 | 11,00582 | 24,34702 | 24,37436 | 1,128  | 1,6709 | 0,914922 | 1,309818 |
| 671 | SZR104 | 70 | 1,1875 | 0,2356 | 1594,487 | 329,6149 | 0,138951 | 7,196807 | 1594,487 | 164,7551 | 0,738182 | 27,36713 | 69,17734 | 69,17734 | 2,4255 | 2,3973 | 0,753431 | 2,00066  |
| 672 | SZR104 | 71 | 1,0846 | 0,1062 | 461,1501 | 106,6406 | 0,453471 | 2,205212 | 461,1501 | 80,20844 | 0,900765 | 13,50167 | 30,34454 | 30,46223 | 1,5272 | 1,9454 | 0,889904 | 1,329543 |
| 673 | SZR104 | 72 | 1,1894 | 0,241  | 901,8347 | 208,4027 | 0,203839 | 4,90584  | 901,8347 | 109,1271 | 0,951637 | 18,21723 | 36,84277 | 37,38351 | 1,1524 | 1,5034 | 0,78119  | 1,909725 |
| 674 | SZR104 | 73 | 1,1668 | 0,2222 | 1377,98  | 263,9246 | 0,206984 | 4,831293 | 1377,98  | 141,2859 | 0,867471 | 23,11018 | 50,1419  | 50,62165 | 1,2387 | 1,6947 | 0,832615 | 1,868019 |
| 675 | SZR104 | 74 | 1,0904 | 0,249  | 524,8416 | 115,7713 | 0,443742 | 2,253562 | 524,8416 | 87,50688 | 0,861298 | 14,22303 | 34,61582 | 34,61582 | 1,7828 | 2,7029 | 0,901767 | 1,322996 |
| 676 | SZR104 | 75 | 1,1161 | 0,2899 | 660,2409 | 164,6301 | 0,22352  | 4,473873 | 660,2409 | 123,2337 | 0,546327 | 23,43993 | 57,19067 | 57,19067 | 3,6437 | 3,8865 | 0,730169 | 1,359518 |
| 677 | SZR104 | 76 | 1,0776 | 0,1246 | 269,2269 | 74,1695  | 0,547858 | 1,82529  | 269,2269 | 61,58677 | 0,891976 | 11,35789 | 21,5358  | 22,21115 | 1,2616 | 2,3766 | 0,890822 | 1,204309 |
| 678 | SZR104 | 77 | 1,0949 | 0,2261 | 542,0691 | 114,2238 | 0,471622 | 2,120341 | 542,0691 | 85,35876 | 0,934906 | 14,37562 | 30,23401 | 30,4267  | 1,1991 | 1,6409 | 0,903323 | 1,381861 |
| 679 | SZR104 | 78 | 1,0497 | 0,0952 | 406,2296 | 89,41472 | 0,591413 | 1,690865 | 406,2296 | 77,24606 | 0,855516 | 13,62555 | 29,89679 | 29,89679 | 1,7961 | 2,0579 | 0,92625  | 1,157531 |
| 680 | SZR104 | 79 | 1,0719 | 0,1871 | 1150,313 | 165,1316 | 0,468639 | 2,338838 | 1150,313 | 130,563  | 0,847979 | 21,75746 | 48,19695 | 48,19901 | 1,3516 | 1,4348 | 0,840483 | 1,264765 |
| 681 | SZR104 | 80 | 1,1006 | 0,1805 | 1051,947 | 166,2385 | 0,439375 | 2,275959 | 1051,947 | 117,8904 | 0,951144 | 19,97704 | 40,77243 | 40,77622 | 1,1878 | 1,5993 | 0,918534 | 1,41011  |
| 682 | SZR104 | 81 | 1,0961 | 0,1741 | 723,4608 | 135,1502 | 0,442792 | 2,258398 | 723,4608 | 102,2113 | 0,870216 | 17,0181  | 36,61809 | 37,10551 | 1,1859 | 1,4491 | 0,889628 | 1,322263 |
| 683 | SZR104 | 82 | 1,0984 | 0,2173 | 1161,203 | 297,3619 | 0,22702  | 4,404899 | 1161,203 | 175,2741 | 0,884035 | 29,23849 | 62,42193 | 64,24977 | 1,2432 | 1,6804 | 0,739145 | 1,695553 |
| 684 | SZR104 | 83 | 1,0939 | 0,2312 | 704,9759 | 140,2186 | 0,335429 | 2,981259 | 704,9759 | 101,7351 | 0,855938 | 17,47805 | 39,35532 | 39,35798 | 1,4956 | 2,0545 | 0,744437 | 1,37872  |
| 685 | SZR104 | 84 | 1,0972 | 0,2174 | 1450,254 | 220,0943 | 0,265516 | 3,766246 | 1450,254 | 157,2423 | 0,73708  | 28,64723 | 61,70238 | 61,70248 | 2,1962 | 1,7473 | 0,705757 | 1,399715 |
| 686 | SZR104 | 85 | 1,1022 | 0,2019 | 642,7305 | 119,9511 | 0,516207 | 1,937207 | 642,7305 | 92,51974 | 0,943561 | 15,60289 | 31,69348 | 31,77911 | 1,0712 | 1,8159 | 0,919589 | 1,296492 |
| 687 | SZR104 | 86 | 1,0784 | 0,2329 | 575,4552 | 111,3544 | 0,545527 | 1,83309  | 575,4552 | 72,20034 | 0,951009 | 14,15819 | 30,14862 | 30,35975 | 1,0875 | 1,8333 | 0,95427  | 1,276995 |
| 688 | SZR104 | 87 | 1,0768 | 0,1044 | 381,7087 | 95,46082 | 0,487744 | 2,050255 | 381,7087 | 73,55046 | 0,886688 | 12,08268 | 27,18264 | 27,18566 | 1,5266 | 1,9961 | 0,926618 | 1,297986 |
| 689 | SZR104 | 88 | 1,1124 | 0,1228 | 919,7538 | 172,4316 | 0,330401 | 2,993641 | 919,7538 | 116,1681 | 0,85646  | 22,32252 | 45,06372 | 45,06372 | 1,6693 | 2,3121 | 0,859316 | 1,484328 |
| 690 | SZR104 | 89 | 1,1085 | 0,1949 | 938,3331 | 162,409  | 0,394425 |          |          |          |          |          |          |          |        |        |          |          |

|               |     |        |        |          |          |          |          |          |          |          |          |          |          |        |        |          |          |
|---------------|-----|--------|--------|----------|----------|----------|----------|----------|----------|----------|----------|----------|----------|--------|--------|----------|----------|
| 742 SZR104_   | 141 | 1,088  | 0,1851 | 1305,738 | 189,8222 | 0,416062 | 2,403489 | 1305,738 | 139,1487 | 0,847437 | 22,97984 | 52,14725 | 52,15218 | 1,3921 | 2,0419 | 0,913663 | 1,364168 |
| 743 SZR104_   | 142 | 1,1245 | 0,2487 | 588,3444 | 140,3046 | 0,326027 | 3,067229 | 588,3444 | 94,39911 | 0,82967  | 17,67307 | 38,04917 | 38,04917 | 1,9267 | 2,6545 | 0,868074 | 1,486292 |
| 744 SZR104_   | 143 | 1,057  | 0,0865 | 513,1155 | 98,01862 | 0,620638 | 1,611245 | 513,1155 | 82,95426 | 0,937017 | 13,33615 | 29,62479 | 29,6344  | 1,213  | 1,3782 | 0,924764 | 1,181598 |
| 745 SZR104_   | 144 | 1,1774 | 0,2383 | 1229     | 264,9707 | 0,168233 | 5,944125 | 1229     | 139,863  | 0,789507 | 24,07041 | 53,40647 | 53,52851 | 1,8086 | 2,3088 | 0,764798 | 1,894502 |
| 746 SZR104_   | 145 | 1,0901 | 0,2205 | 582,4028 | 113,2387 | 0,523857 | 1,908917 | 582,4028 | 89,31147 | 0,917527 | 14,19566 | 32,71121 | 32,71121 | 1,3188 | 1,6806 | 0,917845 | 1,267908 |
| 747 SZR104_   | 146 | 1,0467 | 0,1087 | 342,5695 | 83,43972 | 0,575195 | 1,738541 | 342,5695 | 68,86899 | 0,907619 | 11,20248 | 23,6142  | 24,6016  | 1,1382 | 1,4859 | 0,930256 | 1,211561 |
| 748 SZR104_   | 147 | 1,1147 | 0,2606 | 578,3789 | 129,15   | 0,389301 | 2,568709 | 578,3789 | 87,46229 | 0,950124 | 14,39243 | 29,88943 | 30,04234 | 1,1567 | 1,6476 | 0,893412 | 1,476636 |
| 749 SZR104_   | 148 | 1,1071 | 0,1948 | 1540,541 | 239,9452 | 0,264557 | 3,779905 | 1540,541 | 158,1691 | 0,773819 | 26,77491 | 66,87594 | 66,87594 | 1,933  | 2,7588 | 0,786793 | 1,517017 |
| 750 SZR104_   | 149 | 1,0666 | 0,0936 | 242,0024 | 63,74202 | 0,730682 | 1,368584 | 242,0024 | 56,81174 | 0,942222 | 8,917827 | 20,37388 | 20,37388 | 1,1334 | 1,6452 | 0,976228 | 1,212987 |
| 751 SZR104_   | 150 | 1,1555 | 0,0991 | 485,1994 | 123,5979 | 0,366204 | 2,730718 | 485,1994 | 80,73373 | 0,935356 | 13,18457 | 29,22521 | 29,2566  | 1,2896 | 1,6821 | 0,91752  | 1,530856 |
| 752 SZR104_   | 151 | 1,0529 | 0,1061 | 362,1863 | 83,83741 | 0,606172 | 1,649697 | 362,1863 | 70,93576 | 0,904505 | 11,61899 | 26,06443 | 26,48223 | 1,4094 | 2,3476 | 0,936117 | 1,181878 |
| 753 SZR104_   | 152 | 1,0443 | 0,0987 | 260,4874 | 62,86809 | 0,817006 | 1,223981 | 260,4874 | 58,26628 | 0,964188 | 9,38328  | 20,1161  | 20,11746 | 1,1703 | 2,046  | 0,986483 | 1,078979 |
| 754 SZR104_   | 153 | 1,0994 | 0,2386 | 658,4805 | 126,1589 | 0,462486 | 2,162228 | 658,4805 | 95,96817 | 0,898458 | 16,54796 | 35,28546 | 35,47764 | 1,2741 | 2,7657 | 0,889573 | 1,314591 |
| 755 SZR104_   | 154 | 1,0864 | 0,2308 | 791,2077 | 144,7394 | 0,411484 | 2,43023  | 791,2077 | 110,0893 | 0,82037  | 18,7203  | 45,19887 | 45,19887 | 1,7852 | 2,3872 | 0,867014 | 1,314745 |
| 756 SZR104_   | 155 | 1,0746 | 0,0897 | 455,9944 | 94,7516  | 0,574278 | 1,741318 | 455,9944 | 79,43605 | 0,9081   | 14,4061  | 27,78488 | 28,17025 | 1,3438 | 1,9605 | 0,899759 | 1,192804 |
| 757 SZR104_   | 156 | 1,0843 | 0,1176 | 355,9074 | 122,767  | 0,373694 | 2,675987 | 355,9074 | 59,00236 | 0,746157 | 18,13704 | 37,90348 | 37,90645 | 1,6203 | 3,032  | 0,836635 | 1,292252 |
| 758 SZR104_   | 157 | 1,0935 | 0,1191 | 535,1758 | 93,72039 | 0,455609 | 2,194863 | 535,1758 | 68,01037 | 0,964495 | 10,89388 | 23,40761 | 23,45934 | 1,1171 | 2,5246 | 0,869119 | 1,378031 |
| 759 SZR104_   | 158 | 1,0755 | 0,212  | 1041,887 | 168,3619 | 0,406983 | 2,457105 | 1041,887 | 140,1951 | 0,666138 | 23,87133 | 61,93504 | 61,93504 | 2,3757 | 3,2938 | 0,881118 | 1,200912 |
| 760 SZR104_   | 159 | 1,0998 | 0,2478 | 1013,09  | 185,8502 | 0,277459 | 3,604141 | 1013,09  | 134,7058 | 0,701593 | 23,0761  | 54,00239 | 54,02895 | 1,7851 | 1,903  | 0,752777 | 1,379675 |
| 761 SZR104_   | 160 | 1,0928 | 0,173  | 1117,178 | 166,9402 | 0,464847 | 2,151244 | 1117,178 | 130,0388 | 0,830207 | 21,79395 | 47,86906 | 48,6741  | 1,3709 | 2,2492 | 0,922785 | 1,328373 |
| 762 SZR104_   | 161 | 1,1559 | 0,2177 | 687,0567 | 164,9521 | 0,275788 | 3,625979 | 687,0567 | 95,54782 | 0,871242 | 16,54319 | 37,177   | 37,177   | 1,3275 | 2,3601 | 0,869137 | 1,657014 |
| 763 SZR104_   | 162 | 1,0896 | 0,2156 | 1601,655 | 231,1124 | 0,292724 | 3,416185 | 1601,655 | 184,6815 | 0,590108 | 38,60773 | 82,76952 | 82,76952 | 2,7067 | 2,278  | 0,776831 | 1,25141  |
| 764 SZR104_   | 163 | 1,1445 | 0,2008 | 2540,239 | 366,8071 | 0,160471 | 6,231638 | 2540,239 | 196,4443 | 0,82719  | 34,03454 | 77,84677 | 77,84677 | 1,6202 | 2,4213 | 0,676377 | 1,867232 |
| 765 SZR104_   | 164 | 1,1028 | 0,2792 | 2116,719 | 281,7473 | 0,155409 | 6,346339 | 2116,719 | 191,5962 | 0,724601 | 34,7706  | 77,50356 | 77,50356 | 1,9482 | 1,8259 | 0,463791 | 1,470527 |
| 766 LPS+SZR10 | 1   | 1,0423 | 0,1679 | 672,5957 | 99,5945  | 0,844497 | 1,184136 | 672,5957 | 92,42699 | 0,989387 | 14,44479 | 30,22152 | 30,43759 | 1,0394 | 2,1585 | 0,991073 | 1,077548 |
| 767 LPS+SZR10 | 2   | 1,0392 | 0,1024 | 282,8077 | 67,55355 | 0,753739 | 1,320342 | 282,8077 | 60,88232 | 0,958779 | 10,88213 | 20,43628 | 20,6861  | 1,0496 | 3,338  | 0,972543 | 1,109576 |
| 768 LPS+SZR10 | 3   | 1,0942 | 0,0944 | 510,6006 | 117,1468 | 0,436779 | 2,289487 | 510,6006 | 88,16438 | 0,825476 | 15,58417 | 36,16195 | 36,16195 | 1,9984 | 2,9812 | 0,934183 | 1,328732 |
| 769 LPS+SZR10 | 4   | 1,0696 | 0,0977 | 290,7613 | 71,89486 | 0,688545 | 1,452338 | 290,7613 | 61,48977 | 0,966363 | 9,817544 | 21,78832 | 21,78832 | 1,1845 | 1,3092 | 0,974051 | 1,169217 |
| 770 LPS+SZR10 | 5   | 1,1822 | 0,1924 | 802,8708 | 178,2566 | 0,281659 | 3,503387 | 802,8708 | 102,1997 | 0,965953 | 16,79378 | 35,10817 | 35,10832 | 1,1314 | 1,5626 | 0,887075 | 1,74198  |
| 771 LPS+SZR10 | 6   | 1,0417 | 0,1283 | 141,341  | 45,99663 | 0,834281 | 1,198637 | 141,341  | 42,91248 | 0,964518 | 8,089273 | 15,07823 | 15,09005 | 1,236  | 4,4608 | 0,993772 | 1,075871 |
| 772 LPS+SZR10 | 7   | 1,1213 | 0,2761 | 686,3966 | 155,2959 | 0,296113 | 3,770789 | 686,3966 | 103,1295 | 0,810997 | 18,89085 | 39,49087 | 39,49395 | 1,5697 | 2,9277 | 0,827929 | 1,501835 |
| 773 LPS+SZR10 | 8   | 1,0976 | 0,3128 | 541,4718 | 122,2048 | 0,301141 | 3,320705 | 541,4718 | 95,29131 | 0,74934  | 16,91005 | 37,12835 | 37,16023 | 1,9057 | 1,4962 | 0,660938 | 1,828434 |
| 774 LPS+SZR10 | 9   | 1,196  | 0,1946 | 727,9563 | 177,1349 | 0,259641 | 3,851468 | 727,9563 | 96,78119 | 0,976636 | 16,68535 | 31,7158  | 32,13294 | 1,0361 | 3,0632 | 0,890568 | 1,30262  |
| 775 LPS+SZR10 | 10  | 1,0678 | 0,1073 | 410,8508 | 93,65957 | 0,521456 | 1,917706 | 410,8508 | 75,83264 | 0,897803 | 13,0142  | 26,75426 | 26,75426 | 1,41   | 1,4029 | 0,88599  | 1,235083 |
| 776 LPS+SZR10 | 11  | 1,069  | 0,1226 | 238,733  | 71,59379 | 0,517466 | 1,932494 | 238,733  | 59,50427 | 0,847277 | 11,84567 | 19,50355 | 19,50355 | 1,0862 | 2,12   | 0,884119 | 1,203171 |
| 777 LPS+SZR10 | 12  | 1,0345 | 0,1157 | 230,4021 | 60,80124 | 0,761825 | 1,312638 | 230,4021 | 54,82278 | 0,963327 | 9,303564 | 18,75163 | 18,93532 | 1,1795 | 2,3107 | 0,927211 | 1,109051 |
| 778 LPS+SZR10 | 13  | 1,0715 | 0,0889 | 375,547  | 87,51259 | 0,595428 | 1,679465 | 375,547  | 71,50385 | 0,923028 | 12,32473 | 27,27732 | 27,27732 | 1,4463 | 3,032  | 0,962665 | 1,223886 |
| 779 LPS+SZR10 | 14  | 1,0331 | 0,1358 | 282,1475 | 78,35355 | 0,534473 | 1,871001 | 282,1475 | 70,8666  | 0,705997 | 12,96642 | 30,73571 | 30,73571 | 2,2929 | 2,703  | 0,92546  | 1,105681 |
| 780 LPS+SZR10 | 15  | 1,031  | 0,1292 | 244,8317 | 70,10408 | 0,599738 | 1,667394 | 244,8317 | 65,38839 | 0,719575 | 11,09989 | 26,23934 | 26,23934 | 1,9422 | 2,0268 | 0,958012 | 1,072118 |
| 781 LPS+SZR10 | 16  | 1,0487 | 0,0999 | 505,6021 | 113,4894 | 0,452257 | 2,21113  | 505,6021 | 98,04587 | 0,660937 | 17,12213 | 42,54285 | 42,54592 | 2,7968 | 3,2941 | 0,916807 | 1,157513 |
| 782 LPS+SZR10 | 17  | 1,0961 | 0,2089 | 486,5198 | 112,6229 | 0,437628 | 2,285045 | 486,5198 | 80,60631 | 0,940962 | 13,41005 | 28,1742  | 28,1742  | 1,1809 | 1,5888 | 0,907922 | 1,39197  |
| 783 LPS+SZR10 | 18  | 1,0954 | 0,1028 | 219,745  | 63,35177 | 0,654077 | 1,528873 | 219,745  | 54,36105 | 0,934443 | 8,782801 | 19,75101 | 19,75113 | 1,2519 | 1,3873 | 0,90644  | 1,165389 |
| 784 LPS+SZR10 | 19  | 1,0352 | 0,0878 | 384,6009 | 79,86099 | 0,729981 | 1,369899 | 384,6009 | 71,77278 | 0,93821  | 12,64422 | 25,45917 | 25,45917 | 1,1513 | 2,2536 | 0,963299 | 1,112692 |
| 785 LPS+SZR10 | 20  | 1,0559 | 0,0905 | 486,3626 | 109,0472 | 0,472214 | 2,116784 | 486,3626 | 90,02145 | 0,747527 | 17,0052  | 37,24459 | 37,24459 | 2,3884 | 1,9148 | 0,918751 | 1,205988 |
| 786 LPS+SZR10 | 21  | 1,0957 | 0,1274 | 381,3    | 100,3541 | 0,402897 | 2,482024 | 381,3    | 73,03713 | 0,898233 | 11,62908 | 26,07348 | 26,09124 | 1,2379 | 1,4151 | 0,846813 | 1,374015 |
| 787 LPS+SZR10 | 22  | 1,0763 | 0,1177 | 371,5859 | 94,34362 | 0,470958 | 2,12333  | 371,5859 | 75,28147 | 0,823934 | 12,70975 | 30,04365 | 30,04365 | 1,7742 | 1,756  | 0,897716 | 1,253212 |
| 788 LPS+SZR10 | 23  | 1,1273 | 0,0898 | 583,0001 | 128,509  | 0,400992 | 2,493816 | 583,0001 | 90,70099 | 0,89054  | 16,05202 | 33,98387 | 34,16548 | 1,551  | 2,3901 | 0,903909 | 1,416843 |
| 789 LPS+SZR10 | 24  | 1,0434 | 0,1029 | 205,3154 | 56,49557 | 0,79375  | 1,259842 | 205,3154 | 51,88824 | 0,958281 | 9,595496 | 17,88936 | 18,07679 | 1,1539 | 3,4837 | 0,981932 | 1,088793 |
| 790 LPS+SZR10 | 25  | 1,0929 | 0,0981 | 390,9197 | 94,80195 | 0,507426 | 1,970729 | 390,9197 | 73,4242  | 0,91121  | 11,98399 | 27,2531  | 27,2531  | 1,4521 | 1,4484 | 0,928347 | 1,291154 |
| 791 LPS+SZR10 | 26  | 1,1173 | 0,1097 | 471,5243 | 127,653  | 0,325052 | 3,076249 | 471,5243 | 84,39207 | 0,831975 | 15,181   | 33,7369  | 33,7369  | 1,8006 | 3,2889 | 0,893926 | 1,512619 |
| 792 LPS+SZR10 | 27  | 1,1488 | 0,1612 | 567,5016 | 188,7197 | 0,145951 | 6,851619 | 567,5016 | 105,5347 | 0,640304 | 19,73528 | 45,57255 | 45,57255 | 2,976  | 2,867  | 0,728894 | 1,788225 |
| 793 LPS+SZR10 | 28  | 1,1479 | 0,2132 | 1222,587 | 226,492  | 0,229889 | 4,349918 | 1222,587 | 135,1077 | 0,814645 | 22,89551 | 52,31427 | 52,31445 | 1,7228 | 1,9573 | 0,767601 | 1,676381 |
| 794 LPS+SZR10 | 29  | 1,0366 | 0,0921 | 392,7116 | 80,4234  | 0,730801 | 1,368362 | 392,7116 | 71,66438 | 0,960896 | 11,97387 | 24,72181 | 24,77007 | 1,1427 | 2,1073 | 0,957813 | 1,122223 |
| 795 LPS+SZR10 | 30  | 1,1618 | 0,119  | 451,9076 | 129,4082 | 0,290133 | 3,44669  | 451,9076 | 77,63853 | 0,942116 | 12,89484 | 27,44335 | 27,46498 | 1,1896 | 1,6394 | 0,855583 | 1,666803 |
| 796 LPS+SZR10 | 31  | 1,0946 | 0,1245 | 249,9874 | 77,02411 | 0,451602 | 2,21434  | 249,9874 | 59,70067 | 0,881392 | 10,84638 | 21,63121 | 21,87711 | 1,3937 | 3,1851 | 0,852867 |          |

|     |           |     |        |        |          |          |          |          |          |           |          |          |          |          |        |        |          |           |
|-----|-----------|-----|--------|--------|----------|----------|----------|----------|----------|-----------|----------|----------|----------|----------|--------|--------|----------|-----------|
| 848 | LPS+SZR10 | 83  | 1,0558 | 0,1069 | 394,7865 | 96,07358 | 0,491172 | 2,035945 | 394,7865 | 80,63183  | 0,76306  | 13,96989 | 32,87608 | 32,91957 | 2,2103 | 2,553  | 0,91384  | 1,191509  |
| 849 | LPS+SZR10 | 84  | 1,0494 | 0,0916 | 459,0438 | 93,85248 | 0,597309 | 1,674176 | 459,0438 | 78,57857  | 0,927632 | 12,81043 | 28,73216 | 28,82878 | 1,2939 | 1,4283 | 0,912067 | 1,19015   |
| 850 | LPS+SZR10 | 85  | 1,0935 | 0,2405 | 534,9957 | 109,6495 | 0,473875 | 2,110262 | 534,9957 | 85,70787  | 0,915205 | 14,02927 | 29,38773 | 29,87133 | 1,1025 | 1,4428 | 0,847456 | 1,27934   |
| 851 | LPS+SZR10 | 86  | 1,0361 | 0,1035 | 287,9948 | 72,92624 | 0,662818 | 1,508709 | 287,9948 | 65,54027  | 0,842515 | 10,75931 | 25,87073 | 25,87073 | 1,7595 | 2,7659 | 0,97402  | 1,112694  |
| 852 | LPS+SZR10 | 87  | 1,0367 | 0,1094 | 221,8513 | 58,77748 | 0,78946  | 1,266689 | 221,8513 | 53,66174  | 0,968148 | 8,743245 | 17,8797  | 18,11663 | 1,0466 | 1,6135 | 0,978319 | 1,095333  |
| 853 | LPS+SZR10 | 88  | 1,022  | 0,1052 | 161,9964 | 64,93493 | 0,764044 | 1,308825 | 161,9964 | 60,30977  | 0,950169 | 10,06778 | 23,1456  | 23,1456  | 1,529  | 3,2341 | 0,978522 | 1,07669   |
| 854 | LPS+SZR10 | 89  | 1,0565 | 0,1036 | 331,0007 | 80,10142 | 0,591197 | 1,691482 | 331,0007 | 68,61863  | 0,883394 | 12,81754 | 26,73133 | 26,73134 | 1,5566 | 2,6905 | 0,911957 | 1,167342  |
| 855 | LPS+SZR10 | 90  | 1,0692 | 0,1249 | 227,1327 | 69,20798 | 0,523571 | 1,909959 | 227,1327 | 55,54709  | 0,925053 | 10,03934 | 21,04559 | 21,04559 | 1,2876 | 3,468  | 0,871866 | 1,245933  |
| 856 | LPS+SZR10 | 91  | 1,03   | 0,1    | 267,7494 | 65,69752 | 0,762244 | 1,311916 | 267,7494 | 59,48284  | 0,950943 | 10,45642 | 20,21587 | 20,34165 | 1,0542 | 3,9201 | 0,977809 | 1,104479  |
| 857 | LPS+SZR10 | 92  | 1,05   | 0,1146 | 260,4874 | 69,29397 | 0,640829 | 1,560479 | 260,4874 | 60,31367  | 0,899839 | 9,656418 | 22,36293 | 22,36293 | 1,3922 | 1,8757 | 0,940019 | 1,148893  |
| 858 | LPS+SZR10 | 93  | 1,0428 | 0,1162 | 197,4876 | 56,00142 | 0,777588 | 1,286028 | 197,4876 | 51,97771  | 0,918576 | 9,309734 | 17,95601 | 18,53133 | 1,1202 | 4,8777 | 0,926499 | 1,077412  |
| 859 | LPS+SZR10 | 94  | 1,0893 | 0,1211 | 235,4635 | 72,00922 | 0,528274 | 1,892958 | 235,4635 | 59,00406  | 0,849903 | 10,39885 | 22,2205  | 22,30046 | 1,7153 | 2,0478 | 0,925768 | 1,220411  |
| 860 | LPS+SZR10 | 95  | 1,0557 | 0,1093 | 395,1637 | 96,41028 | 0,484092 | 2,065721 | 395,1637 | 77,91809  | 0,817918 | 12,86135 | 30,80466 | 30,95305 | 1,6319 | 2,3742 | 0,906126 | 1,237329  |
| 861 | LPS+SZR10 | 96  | 1,1228 | 0,2857 | 523,0496 | 122,4732 | 0,327292 | 3,055377 | 523,0496 | 88,81071  | 0,833339 | 16,03569 | 31,41502 | 32,50332 | 1,2887 | 1,7765 | 0,746905 | 1,379037  |
| 862 | LPS+SZR10 | 97  | 1,0357 | 0,1456 | 160,9577 | 56,99699 | 0,604979 | 1,652949 | 160,9577 | 50,93661  | 0,779581 | 8,744592 | 21,24406 | 21,24406 | 1,9258 | 4,31   | 0,97168  | 1,118979  |
| 863 | LPS+SZR10 | 98  | 1,0439 | 0,1154 | 293,0247 | 75,39805 | 0,609092 | 1,641788 | 293,0247 | 64,49913  | 0,885128 | 10,64433 | 24,0567  | 24,27332 | 1,5007 | 2,267  | 0,94035  | 1,168978  |
| 864 | LPS+SZR10 | 99  | 1,1118 | 0,224  | 723,4923 | 144,8002 | 0,361133 | 2,661066 | 723,4923 | 103,04272 | 0,856191 | 17,98395 | 40,42709 | 40,42709 | 1,5338 | 2,2596 | 0,832841 | 1,051183  |
| 865 | LPS+SZR10 | 100 | 1,0723 | 0,0883 | 478,3776 | 99,89557 | 0,562816 | 1,776778 | 478,3776 | 80,41683  | 0,929579 | 13,06096 | 27,41413 | 27,89504 | 1,0729 | 1,6458 | 0,934284 | 1,242222  |
| 866 | LPS+SZR10 | 101 | 1,1074 | 0,2838 | 523,2068 | 111,1718 | 0,396418 | 2,522588 | 523,2068 | 91,24351  | 0,789731 | 16,54961 | 33,96305 | 34,21551 | 1,4006 | 1,9789 | 0,745178 | 1,218408  |
| 867 | LPS+SZR10 | 102 | 1,0232 | 0,1343 | 269,2898 | 73,71099 | 0,553386 | 1,807056 | 269,2898 | 68,08757  | 0,729951 | 12,08785 | 26,08252 | 26,23917 | 1,4712 | 1,9361 | 0,888513 | 1,082591  |
| 868 | LPS+SZR10 | 103 | 1,0763 | 0,089  | 609,0614 | 123,9629 | 0,435904 | 2,294083 | 609,0614 | 97,90672  | 0,798446 | 16,11021 | 39,72977 | 39,72977 | 1,9957 | 2,2264 | 0,875194 | 1,266133  |
| 869 | LPS+SZR10 | 104 | 1,0702 | 0,1127 | 193,778  | 57,56667 | 0,712989 | 1,402546 | 193,778  | 50,15303  | 0,968098 | 9,387376 | 17,0148  | 17,21844 | 1,0869 | 5,096  | 0,970311 | 1,14782   |
| 870 | LPS+SZR10 | 105 | 1,0377 | 0,1033 | 234,3003 | 71,89486 | 0,528351 | 1,892683 | 234,3003 | 63,91615  | 0,720711 | 10,07606 | 27,80525 | 27,80525 | 2,0406 | 2,9864 | 0,927546 | 1,124831  |
| 871 | LPS+SZR10 | 106 | 1,1433 | 0,1384 | 495,888  | 126,4066 | 0,341408 | 2,929043 | 495,888  | 80,97984  | 0,950253 | 13,59301 | 27,78941 | 27,78941 | 1,0996 | 1,7803 | 0,875428 | 1,056093  |
| 872 | LPS+SZR10 | 107 | 1,0435 | 0,0896 | 371,303  | 81,5984  | 0,677036 | 1,477027 | 371,303  | 73,72748  | 0,858379 | 13,44328 | 28,84573 | 28,84794 | 1,6978 | 3,2519 | 0,966133 | 1,10675   |
| 873 | LPS+SZR10 | 108 | 1,0573 | 0,0953 | 455,0199 | 93,52305 | 0,609067 | 1,641856 | 455,0199 | 79,12495  | 0,913299 | 13,84548 | 29,36901 | 29,36998 | 1,4809 | 3,2185 | 0,931671 | 1,181967  |
| 874 | LPS+SZR10 | 109 | 1,0314 | 0,1044 | 294,9424 | 68,60993 | 0,776281 | 1,288193 | 294,9424 | 62,13138  | 0,960118 | 10,78454 | 22,32706 | 22,32706 | 1,2132 | 3,8399 | 0,985931 | 1,104272  |
| 875 | LPS+SZR10 | 110 | 1,0439 | 0,1227 | 200,9142 | 55,56809 | 0,81164  | 1,232073 | 200,9142 | 51,51241  | 0,951473 | 8,171294 | 18,39363 | 18,39663 | 1,2241 | 2,4981 | 0,992646 | 1,078732  |
| 876 | LPS+SZR10 | 111 | 1,0603 | 0,1248 | 512,9584 | 98,4594  | 0,643905 | 1,553025 | 512,9584 | 85,75934  | 0,876453 | 14,39387 | 33,5083  | 33,5083  | 1,7411 | 2,186  | 0,968377 | 1,148089  |
| 877 | LPS+SZR10 | 112 | 1,0741 | 0,1192 | 356,0785 | 92,82128 | 0,462599 | 2,161701 | 356,0785 | 74,86202  | 0,798441 | 12,46977 | 28,03998 | 28,73244 | 1,4426 | 2,4434 | 0,890704 | 1,123988  |
| 878 | LPS+SZR10 | 113 | 1,04   | 0,0925 | 407,4242 | 87,79894 | 0,630396 | 1,856305 | 407,4242 | 78,77656  | 0,825016 | 12,29574 | 29,55466 | 29,85321 | 1,3256 | 1,9996 | 0,949151 | 1,145831  |
| 879 | LPS+SZR10 | 114 | 1,0367 | 0,1108 | 233,7659 | 61,47482 | 0,752748 | 1,328466 | 233,7659 | 56,81816  | 0,909948 | 9,388121 | 20,77723 | 20,77739 | 1,3568 | 1,8458 | 0,968397 | 1,081957  |
| 880 | LPS+SZR10 | 115 | 1,1175 | 0,1228 | 288,2149 | 85,47837 | 0,457576 | 2,18543  | 288,2149 | 61,97897  | 0,942838 | 10,08617 | 21,77317 | 21,77317 | 1,188  | 1,2611 | 0,923102 | 1,139151  |
| 881 | LPS+SZR10 | 116 | 1,0696 | 0,2249 | 562,0002 | 102,6285 | 0,633572 | 1,578352 | 562,0002 | 85,6172   | 0,963438 | 13,75617 | 28,94202 | 29,25888 | 1,1264 | 1,2778 | 0,949401 | 1,196961  |
| 882 | LPS+SZR10 | 117 | 1,0382 | 0,1307 | 265,423  | 64,45124 | 0,790391 | 1,265197 | 265,423  | 59,38605  | 0,94633  | 9,946968 | 21,73559 | 21,73559 | 1,2319 | 2,4471 | 0,984366 | 1,085622  |
| 883 | LPS+SZR10 | 118 | 1,0432 | 0,1862 | 768,2272 | 119,3562 | 0,659964 | 1,515235 | 768,2272 | 104,3362  | 0,878412 | 19,60539 | 39,80803 | 39,80954 | 1,422  | 5,8155 | 0,973892 | 1,13835   |
| 884 | LPS+SZR10 | 119 | 1,0543 | 0,1594 | 850,9695 | 131,5032 | 0,596694 | 1,6759   | 850,9695 | 111,2276  | 0,864367 | 18,43418 | 37,26991 | 40,76816 | 1,0855 | 2,258  | 0,964941 | 1,182289  |
| 885 | LPS+SZR10 | 120 | 1,0632 | 0,1586 | 727,9249 | 110,939  | 0,722149 | 1,384756 | 727,9249 | 96,75422  | 0,977139 | 17,36892 | 32,50537 | 32,5175  | 1,1037 | 3,0233 | 0,971626 | 1,146606  |
| 886 | LPS+SZR10 | 121 | 1,0209 | 0,0938 | 329,9004 | 70,23617 | 0,831962 | 1,201978 | 329,9004 | 65,31484  | 0,971781 | 10,54059 | 23,02576 | 23,02576 | 1,2246 | 2,2274 | 0,989994 | 1,075348  |
| 887 | LPS+SZR10 | 122 | 1,0623 | 0,0926 | 400,4137 | 90,77535 | 0,583645 | 1,713371 | 400,4137 | 78,50782  | 0,81638  | 14,49248 | 30,59218 | 30,68486 | 1,8573 | 3,2166 | 0,955798 | 1,162529  |
| 888 | LPS+SZR10 | 123 | 1,0417 | 0,1109 | 188,5594 | 54,76543 | 0,767772 | 1,30247  | 188,5594 | 50,45294  | 0,931858 | 9,219752 | 18,2908  | 18,31128 | 1,3459 | 6,3249 | 0,971824 | 1,086057  |
| 889 | LPS+SZR10 | 124 | 1,0444 | 0,1068 | 229,742  | 59,63351 | 0,801728 | 1,247305 | 229,742  | 54,53624  | 0,970687 | 9,292394 | 18,89525 | 18,89525 | 1,1562 | 3,7973 | 0,987548 | 1,093466  |
| 890 | LPS+SZR10 | 125 | 1,0744 | 0,1085 | 232,0054 | 66,63972 | 0,621016 | 1,610265 | 232,0054 | 56,3184   | 0,919194 | 9,607039 | 20,29736 | 20,29736 | 1,1269 | 2,5821 | 0,945935 | 1,183267  |
| 891 | LPS+SZR10 | 126 | 1,0405 | 0,2375 | 494,5677 | 92,05124 | 0,708656 | 1,411122 | 494,5677 | 81,62887  | 0,932621 | 14,04312 | 28,83592 | 28,83677 | 1,2896 | 2,3982 | 0,961884 | 1,127625  |
| 892 | LPS+SZR10 | 127 | 1,081  | 0,098  | 398,3074 | 89,94131 | 0,57479  | 1,739765 | 398,3074 | 72,93823  | 0,939287 | 12,36152 | 25,40477 | 25,43129 | 1,2125 | 2,0449 | 0,928966 | 1,232096  |
| 893 | LPS+SZR10 | 128 | 1,0441 | 0,0827 | 504,7218 | 95,85106 | 0,667558 | 1,497997 | 504,7218 | 82,74424  | 0,926373 | 13,25099 | 29,96663 | 29,96665 | 1,293  | 1,6292 | 0,966988 | 1,158402  |
| 894 | LPS+SZR10 | 129 | 1,0392 | 0,0825 | 436,5663 | 82,76613 | 0,787015 | 1,270623 | 436,5663 | 75,50183  | 0,962376 | 12,48241 | 25,65598 | 25,65995 | 1,1549 | 2,6508 | 0,982718 | 1,096214  |
| 895 | LPS+SZR10 | 130 | 1,0228 | 0,095  | 77,5263  | 66,21684 | 0,783941 | 1,275606 | 77,5263  | 61,35766  | 0,926352 | 10,09727 | 21,64718 | 21,72496 | 1,1387 | 2,531  | 0,958614 | 1,071994  |
| 896 | LPS+SZR10 | 131 | 1,1446 | 0,1252 | 362,6893 | 110,3128 | 0,327852 | 3,050155 | 362,6893 | 69,56567  | 0,94179  | 11,51638 | 24,74468 | 24,74468 | 1,1852 | 1,7536 | 0,875358 | 1,1585736 |
| 897 | LPS+SZR10 | 132 | 1,1765 | 0,1226 | 373,9437 | 120,6972 | 0,285634 | 3,500989 | 373,9437 | 125,55853 | 0,892563 | 12,76099 | 27,78941 | 27,8158  | 1,4606 | 3,1337 | 0,885498 | 1,063446  |
| 898 | LPS+SZR10 | 133 | 1,1646 | 0,0996 | 641,8188 | 165,6479 | 0,253377 | 3,946685 | 641,8188 | 100,628   | 0,796497 | 16,97686 | 39,53741 | 39,73186 | 1,91   | 2,1421 | 0,86202  | 1,164614  |
| 899 | LPS+SZR10 | 134 | 1,1763 | 0,1296 | 799,0669 | 179,4567 | 0,25856  | 3,867576 | 799,0669 | 104,2734  | 0,923519 | 17,29543 | 35,6577  | 36,33245 | 1,2229 | 4,2712 | 0,829255 | 1,127102  |
| 900 | LPS+SZR10 | 135 | 1,0719 | 0,1199 | 229,0503 | 67,76135 | 0,590389 | 1,6938   | 229,0503 | 56,78961  | 0,892489 | 9,13227  | 20,14188 | 20,21832 | 1,1798 | 1,7514 | 0,941806 | 1,11932   |
| 901 | LPS+SZR10 | 136 | 1,0335 | 0,1189 | 260,7389 | 66,94823 | 0,705737 | 1,416958 | 260,7389 | 59,48351  | 0,926204 | 10,003   |          |          |        |        |          |           |

|                |     |        |        |          |          |          |          |          |          |          |          |          |          |        |        |          |          |
|----------------|-----|--------|--------|----------|----------|----------|----------|----------|----------|----------|----------|----------|----------|--------|--------|----------|----------|
| 954 LPS+SZR10- | 189 | 1,0554 | 0,1105 | 219,0219 | 59,49397 | 0,754822 | 1,324815 | 219,0219 | 53,87032 | 0,948414 | 8,832411 | 19,17846 | 19,19677 | 1,2142 | 1,6722 | 0,970719 | 1,104392 |
| 955 LPS+SZR10- | 190 | 1,1204 | 0,1125 | 247,8811 | 81,57323 | 0,442058 | 2,262148 | 247,8811 | 61,25683 | 0,830126 | 10,11066 | 25,25585 | 25,25585 | 1,8884 | 2,6383 | 0,944325 | 1,331659 |
| 956 LPS+SZR10- | 191 | 1,1409 | 0,2539 | 749,9308 | 161,317  | 0,302824 | 3,302248 | 749,9308 | 100,8626 | 0,926339 | 17,25807 | 36,76759 | 36,76759 | 1,1711 | 1,9149 | 0,836219 | 1,599373 |
| 957 LPS+SZR10- | 192 | 1,1124 | 0,1481 | 257,8781 | 89,32128 | 0,319128 | 3,133543 | 257,8781 | 72,97234 | 0,608566 | 11,15894 | 33,20908 | 33,20908 | 2,721  | 3,2981 | 0,785688 | 1,224043 |
| 958 LPS+SZR10- | 193 | 1,0207 | 0,1047 | 334,2073 | 74,43812 | 0,73042  | 1,369076 | 334,2073 | 68,39422 | 0,897814 | 11,4052  | 26,06443 | 26,06443 | 1,5226 | 2,8661 | 0,963691 | 1,088369 |
| 959 LPS+SZR10- | 194 | 1,1271 | 0,2373 | 523,0182 | 118,6333 | 0,418126 | 2,391622 | 523,0182 | 83,58615 | 0,940714 | 14,37589 | 30,09906 | 30,20949 | 1,2153 | 2,0676 | 0,895354 | 1,419294 |
| 960 LPS+SZR10- | 195 | 1,0631 | 0,0996 | 351,0261 | 81,41596 | 0,631382 | 1,583827 | 351,0261 | 69,28459 | 0,918916 | 10,97883 | 25,10729 | 25,29631 | 1,3804 | 1,8806 | 0,948773 | 1,175095 |
| 961 LPS+SZR10- | 196 | 1,1283 | 0,2383 | 979,3899 | 185,9466 | 0,293841 | 3,403205 | 979,3899 | 119,489  | 0,862004 | 18,8331  | 47,01926 | 47,01926 | 1,4915 | 1,8829 | 0,825512 | 1,556182 |
| 962 LPS+SZR10- | 197 | 1,0281 | 0,0952 | 454,3597 | 92,10461 | 0,640498 | 1,561286 | 454,3597 | 81,98277 | 0,849502 | 13,52965 | 32,50683 | 32,50722 | 1,732  | 2,8529 | 0,951636 | 1,123463 |
| 963 LPS+SZR10- | 198 | 1,1605 | 0,2467 | 701,2977 | 175,0798 | 0,24425  | 4,094168 | 701,2977 | 100,9463 | 0,86483  | 16,86546 | 38,28514 | 38,28516 | 1,6336 | 2,0868 | 0,849561 | 1,734385 |
| 964 LPS+SZR10- | 199 | 1,1671 | 0,2224 | 1180,084 | 274,1771 | 0,165097 | 6,057038 | 1180,084 | 139,6211 | 0,760712 | 25,35888 | 58,03915 | 58,03915 | 2,2676 | 1,6963 | 0,836912 | 1,963722 |
| 965 LPS+SZR10- | 200 | 1,1422 | 0,2227 | 796,2062 | 172,3468 | 0,300123 | 3,331966 | 796,2062 | 101,9527 | 0,962582 | 16,66035 | 35,04768 | 35,04768 | 1,1803 | 1,62   | 0,890986 | 1,690459 |
| 966 LPS+SZR10- | 201 | 1,1612 | 0,2674 | 1033,336 | 219,6654 | 0,189015 | 5,290596 | 1033,336 | 120,7554 | 0,890509 | 20,11284 | 43,8302  | 43,83069 | 1,1679 | 1,3799 | 0,702373 | 1,819095 |
| 967 LPS+SZR10- | 202 | 1,2274 | 0,249  | 801,0475 | 235,0113 | 0,150151 | 6,659974 | 801,0475 | 102,8172 | 0,952218 | 16,58059 | 34,34504 | 35,10819 | 1,032  | 1,5347 | 0,823383 | 2,28572  |
| 968 LPS+SZR10- | 203 | 1,1358 | 0,2247 | 539,5227 | 131,2924 | 0,34929  | 2,862953 | 539,5227 | 84,66887 | 0,94574  | 14,25301 | 29,19131 | 29,19223 | 1,1211 | 1,9583 | 0,888067 | 1,550657 |
| 969 LPS+SZR10- | 204 | 1,0817 | 0,0932 | 366,6818 | 86,41312 | 0,580414 | 1,722907 | 366,6818 | 70,39819 | 0,929771 | 11,46904 | 24,42693 | 24,43287 | 1,1808 | 1,4499 | 0,940586 | 1,227491 |
| 970 LPS+SZR10- | 205 | 1,075  | 0,1111 | 366,2416 | 98,88528 | 0,426509 | 2,344615 | 366,2416 | 78,9945  | 0,737536 | 14,70676 | 32,92387 | 32,92387 | 2,4249 | 3,3094 | 0,90618  | 1,2518   |
| 971 LPS+SZR10- | 206 | 1,0635 | 0,092  | 475,454  | 98,53067 | 0,578273 | 1,729287 | 475,454  | 80,58475 | 0,920052 | 13,02131 | 29,98184 | 29,98184 | 1,4002 | 1,6997 | 0,939632 | 1,222696 |
| 972 LPS+SZR10- | 207 | 1,04   | 0,1147 | 201,9516 | 57,29805 | 0,743996 | 1,344092 | 201,9516 | 51,62176 | 0,952338 | 8,859273 | 17,5281  | 17,64005 | 1,1578 | 2,2809 | 0,962484 | 1,109959 |
| 973 LPS+SZR10- | 208 | 1,0549 | 0,114  | 223,4546 | 60,88723 | 0,735378 | 1,359844 | 223,4546 | 54,07472 | 0,960307 | 8,807855 | 19,37498 | 19,37498 | 1,1843 | 1,7209 | 0,970878 | 1,125983 |
| 974 LPS+SZR10- | 209 | 1,0555 | 0,1223 | 188,025  | 56,76401 | 0,702277 | 1,42394  | 188,025  | 51,15245 | 0,903009 | 9,210301 | 17,80569 | 18,10222 | 1,1294 | 2,3382 | 0,957699 | 1,109703 |

# Supplementary Table S2

| Mann-Whitney U Test Post-hoc analysis of multiple comparisons |     |     |     |           |           |           |          |          |          |          |          |          |          |          |          |          | Kruskal-Wallis H-test |                  |          |          |                                                                              |                                                                             |
|---------------------------------------------------------------|-----|-----|-----|-----------|-----------|-----------|----------|----------|----------|----------|----------|----------|----------|----------|----------|----------|-----------------------|------------------|----------|----------|------------------------------------------------------------------------------|-----------------------------------------------------------------------------|
|                                                               | n-1 | n-2 | N   | Median-1  | Median-2  | Q1-1      | Q1-2     | Q3-1     | Q3-2     | Mean-1   | Mean-2   | SD-1     | SD-2     | SEM-1    | SEM-2    | Z-score  | p-value               | adjusted p-value | U1-value | U2-value |                                                                              |                                                                             |
| <b>Area</b>                                                   |     |     |     |           |           |           |          |          |          |          |          |          |          |          |          |          |                       |                  |          |          |                                                                              |                                                                             |
| SZR104-LPS+SZR104                                             | 164 | 209 | 373 | 581,91552 | 384,60088 | 397,9695  | 257,8781 | 904,5225 | 523,0496 | 710,7885 | 443,1239 | 445,7885 | 265,4401 | 34,91685 | 18,40496 | -7,03774 | 1,95E-12              | 2,93E-11         | 24412,5  | 9863,5   | Kruskal-Wallis H statistic=175,78900983519304, p-value=4,242269272588465e-36 |                                                                             |
| LPS+KYNA-SZR104                                               | 215 | 164 | 379 | 318,58307 | 581,91552 | 239,1259  | 397,9695 | 456,8589 | 523,0496 | 365,5611 | 710,7885 | 197,133  | 445,7885 | 13,47573 | 34,91685 | -9,64628 | 5,10E-22              | 7,65E-21         | 7436,5   | 27823,5  |                                                                              |                                                                             |
| LPS+KYNA-LPS+SZR104                                           | 215 | 209 | 424 | 318,58307 | 384,60088 | 239,1259  | 257,8781 | 456,8589 | 523,0496 | 365,5611 | 443,1239 | 197,133  | 265,4401 | 13,47573 | 18,40496 | -3,11409 | 1,85E-03              | 2,77E-02         | 18538,5  | 26396,5  |                                                                              |                                                                             |
| KYNA-LPS+KYNA                                                 | 107 | 215 | 322 | 231,34525 | 318,58307 | 193,4793  | 239,1259 | 328,973  | 456,8589 | 290,9235 | 365,5611 | 186,1807 | 197,133  | 18,08347 | 13,47573 | -4,81952 | 1,44E-06              | 2,16E-05         | 7709,5   | 15295,5  |                                                                              |                                                                             |
| KYNA-SZR104                                                   | 107 | 164 | 271 | 231,34525 | 581,91552 | 193,4793  | 397,9695 | 328,973  | 904,5225 | 290,9235 | 710,7885 | 186,1807 | 445,7885 | 18,08347 | 34,91685 | -10,4134 | 2,15E-25              | 3,23E-24         | 2206     | 15342    |                                                                              |                                                                             |
| KYNA-LPS+SZR104                                               | 107 | 209 | 316 | 231,34525 | 384,60088 | 193,4793  | 257,8781 | 328,973  | 523,0496 | 290,9235 | 443,1239 | 186,1807 | 265,4401 | 18,08347 | 18,40496 | -6,85266 | 7,25E-12              | 1,09E-10         | 5914     | 16449    |                                                                              |                                                                             |
| LPS-KYNA                                                      | 131 | 107 | 238 | 339,52015 | 231,34525 | 232,2412  | 193,4793 | 459,2953 | 328,973  | 373,6214 | 290,9235 | 191,3276 | 186,1807 | 16,78054 | 18,08347 | -4,60475 | 4,13E-06              | 6,19E-05         | 9442     | 4575     |                                                                              |                                                                             |
| LPS-LPS+KYNA                                                  | 131 | 215 | 346 | 339,52015 | 318,58307 | 232,2412  | 239,1259 | 459,2953 | 456,8589 | 373,6214 | 365,5611 | 191,3276 | 197,133  | 16,78054 | 13,47573 | -0,47481 | 6,35E-01              | 1,00E+00         | 14511,5  | 13653,5  |                                                                              |                                                                             |
| LPS-SZR104                                                    | 131 | 164 | 295 | 339,52015 | 581,91552 | 232,2412  | 397,9695 | 459,2953 | 904,5225 | 373,6214 | 710,7885 | 191,3276 | 445,7885 | 16,78054 | 34,91685 | -8,22975 | 1,88E-16              | 2,81E-15         | 4750,5   | 16733,5  |                                                                              |                                                                             |
| LPS-LPS+SZR104                                                | 131 | 209 | 340 | 339,52015 | 384,60088 | 232,2412  | 257,8781 | 459,2953 | 523,0496 | 373,6214 | 443,1239 | 191,3276 | 265,4401 | 16,78054 | 18,40496 | -2,37627 | 1,75E-02              | 6,62E-01         | 11593    | 15786    |                                                                              |                                                                             |
| CONTROL-LPS                                                   | 148 | 107 | 279 | 288,16772 | 339,52015 | 199,2559  | 232,2412 | 448,7718 | 459,2953 | 356,0807 | 373,6214 | 219,567  | 191,3276 | 18,10958 | 18,40496 | -1,89415 | 5,82E-02              | 8,73E-01         | 8419,5   | 10968,5  |                                                                              |                                                                             |
| CONTROL-KYNA                                                  | 148 | 107 | 255 | 288,16772 | 231,34525 | 199,2559  | 193,4793 | 448,7718 | 328,973  | 356,0807 | 290,9235 | 219,567  | 186,1807 | 18,10958 | 18,08347 | -2,46716 | 1,36E-02              | 2,04E-01         | 9352,5   | 6483,5   |                                                                              |                                                                             |
| CONTROL-LPS+KYNA                                              | 148 | 215 | 363 | 288,16772 | 318,58307 | 199,2559  | 239,1259 | 448,7718 | 456,8589 | 356,0807 | 365,5611 | 219,567  | 197,133  | 18,10958 | 13,47573 | -1,67337 | 9,42E-02              | 1,00E+00         | 14265,5  | 17554,5  |                                                                              |                                                                             |
| CONTROL-SZR104                                                | 148 | 164 | 312 | 288,16772 | 581,91552 | 199,2559  | 397,9695 | 448,7718 | 904,5225 | 356,0807 | 710,7885 | 219,567  | 445,7885 | 18,10958 | 34,91685 | -9,10488 | 8,64E-20              | 1,30E-18         | 4891     | 19381    |                                                                              |                                                                             |
| CONTROL-LPS+SZR104                                            | 148 | 209 | 357 | 288,16772 | 384,60088 | 199,2559  | 257,8781 | 448,7718 | 523,0496 | 356,0807 | 443,1239 | 219,567  | 265,4401 | 18,10958 | 18,40496 | -4,07963 | 4,51E-05              | 6,77E-04         | 11546,5  | 19385,5  |                                                                              |                                                                             |
| <b>Perimeter</b>                                              |     |     |     |           |           |           |          |          |          |          |          |          |          |          |          |          |                       |                  |          |          |                                                                              |                                                                             |
| SZR104-LPS+SZR104                                             | 164 | 209 | 373 | 116,67562 | 89,321277 | 90,88387  | 67,76135 | 164,184  | 118,6333 | 134,1879 | 100,8863 | 60,35826 | 45,79642 | 4,727623 | 3,175411 | -6,21244 | 5,22E-10              | 7,83E-09         | 23559,5  | 10716,5  |                                                                              | Kruskal-Wallis H statistic=15,0359736661822, p-value=3,0140820327179816e-31 |
| LPS+KYNA-SZR104                                               | 215 | 164 | 379 | 79,27039  | 116,67562 | 89,321277 | 90,88387 | 101,3481 | 164,184  | 86,91958 | 134,1879 | 32,54659 | 60,35826 | 2,224839 | 4,727623 | -9,01931 | 1,89E-19              | 2,84E-18         | 8099     | 27161    |                                                                              |                                                                             |
| LPS+KYNA-LPS+SZR104                                           | 215 | 209 | 424 | 79,27039  | 89,321277 | 64,21667  | 67,76135 | 101,3481 | 118,6333 | 86,91958 | 100,8863 | 32,54659 | 45,79642 | 2,224839 | 3,175411 | -2,98448 | 2,84E-03              | 4,26E-02         | 17802    | 26233    |                                                                              |                                                                             |
| KYNA-LPS+KYNA                                                 | 107 | 215 | 322 | 65,253901 | 79,27039  | 55,10381  | 64,21667 | 83,45754 | 101,3481 | 73,40954 | 86,91958 | 27,5927  | 32,54659 | 2,68004  | 2,224839 | -6,60004 | 3,16E-06              | 4,74E-05         | 7835     | 15170    |                                                                              |                                                                             |
| KYNA-SZR104                                                   | 107 | 164 | 271 | 65,253901 | 116,67562 | 55,10381  | 90,88387 | 83,45754 | 164,184  | 73,40954 | 134,1879 | 27,5927  | 60,35826 | 2,68004  | 4,727623 | -10,1343 | 3,89E-24              | 5,84E-23         | 2382     | 15166    |                                                                              |                                                                             |
| KYNA-LPS+SZR104                                               | 107 | 209 | 316 | 65,253901 | 89,321277 | 55,10381  | 67,76135 | 83,45754 | 118,6333 | 73,40954 | 100,8863 | 27,5927  | 45,79642 | 2,68004  | 3,175411 | -6,60546 | 3,96E-11              | 5,94E-10         | 6104     | 16259    |                                                                              |                                                                             |
| LPS-KYNA                                                      | 131 | 107 | 238 | 83,586525 | 65,253901 | 65,31472  | 55,10381 | 100,2844 | 83,45754 | 86,48892 | 73,40954 | 29,37002 | 27,5927  | 2,575921 | 2,68004  | -4,4505  | 8,57E-06              | 1,29E-04         | 9360,5   | 4656,5   |                                                                              |                                                                             |
| LPS-LPS+KYNA                                                  | 131 | 215 | 346 | 83,586525 | 79,27039  | 65,31472  | 64,21667 | 100,2844 | 101,3481 | 86,48892 | 86,91958 | 29,37002 | 32,54659 | 2,575921 | 2,224839 | -0,14073 | 8,88E-01              | 1,00E+00         | 14210    | 13955    |                                                                              |                                                                             |
| LPS-SZR104                                                    | 131 | 164 | 295 | 83,586525 | 116,67562 | 65,31472  | 90,88387 | 100,2844 | 164,184  | 86,48892 | 134,1879 | 29,37002 | 60,35826 | 2,575921 | 4,727623 | -8,11436 | 4,88E-16              | 7,33E-15         | 4834,5   | 16649,5  |                                                                              |                                                                             |
| LPS-LPS+SZR104                                                | 131 | 209 | 340 | 83,586525 | 89,321277 | 65,31472  | 67,76135 | 100,2844 | 118,6333 | 86,48892 | 100,8863 | 29,37002 | 45,79642 | 2,575921 | 3,175411 | -2,52819 | 1,15E-02              | 1,72E-01         | 11459    | 15920    |                                                                              |                                                                             |
| CONTROL-LPS                                                   | 148 | 107 | 279 | 76,877216 | 83,586525 | 59,62726  | 65,31472 | 107,7949 | 100,2844 | 89,71943 | 86,48892 | 41,56886 | 29,37002 | 3,428541 | 2,575921 | -0,86828 | 3,85E-01              | 1,00E+00         | 9109,5   | 10278,5  |                                                                              |                                                                             |
| CONTROL-KYNA                                                  | 148 | 107 | 255 | 76,877216 | 65,253901 | 59,62726  | 55,10381 | 107,7949 | 83,45754 | 73,40954 | 86,48892 | 27,5927  | 32,54659 | 2,428541 | 2,224839 | -3,26976 | 1,08E-03              | 1,62E-02         | 9819     | 6017     |                                                                              |                                                                             |
| CONTROL-LPS+KYNA                                              | 148 | 215 | 363 | 76,877216 | 79,27039  | 59,62726  | 64,21667 | 107,7949 | 101,3481 | 89,71943 | 86,91958 | 41,56886 | 32,54659 | 3,428541 | 2,224839 | -0,74202 | 4,58E-01              | 1,00E+00         | 15180,5  | 16639,5  |                                                                              |                                                                             |
| CONTROL-SZR104                                                | 148 | 164 | 312 | 76,877216 | 116,67562 | 59,62726  | 90,88387 | 107,7949 | 164,184  | 89,71943 | 134,1879 | 41,56886 | 60,35826 | 3,428541 | 4,727623 | -7,8066  | 5,87E-15              | 8,81E-14         | 5924     | 18348    |                                                                              |                                                                             |
| CONTROL-LPS+SZR104                                            | 148 | 209 | 357 | 76,877216 | 89,321277 | 59,62726  | 67,76135 | 107,7949 | 118,6333 | 89,71943 | 100,8863 | 41,56886 | 45,79642 | 3,428541 | 3,175411 | -3,10214 | 1,92E-03              | 2,88E-02         | 12485,5  | 18446,5  |                                                                              |                                                                             |
| <b>Circularity</b>                                            |     |     |     |           |           |           |          |          |          |          |          |          |          |          |          |          |                       |                  |          |          |                                                                              |                                                                             |
| SZR104-LPS+SZR104                                             | 164 | 209 | 373 | 0,472714  | 0,57479   | 0,35269   | 0,409766 | 0,600867 | 0,712989 | 0,47365  | 0,551494 | 0,174232 | 0,185485 | 0,013647 | 0,012861 | -3,95861 | 7,54E-05              | 1,13E-03         | 13046    | 21230    | Kruskal-Wallis H statistic=74,32603925194775, p-value=1,2860102034675554e-14 |                                                                             |
| LPS+KYNA-SZR104                                               | 215 | 164 | 379 | 0,601394  | 0,472714  | 0,467334  | 0,35269  | 0,721002 | 0,600867 | 0,591441 | 0,47365  | 0,159867 | 0,174232 | 0,010928 | 0,013647 | -6,20577 | 5,44E-10              | 8,16E-09         | 24188    | 11072    |                                                                              |                                                                             |
| LPS+KYNA-LPS+SZR104                                           | 215 | 209 | 424 | 0,601394  | 0,57479   | 0,467334  | 0,409766 | 0,721002 | 0,712989 | 0,591441 | 0,551494 | 0,159867 | 0,185485 | 0,010928 | 0,012861 | -2,01343 | 4,41E-02              | 6,61E-01         | 25008    | 19927    |                                                                              |                                                                             |
| KYNA-LPS+KYNA                                                 | 107 | 215 | 322 | 0,708405  | 0,601394  | 0,542238  | 0,467334 | 0,792865 | 0,721002 | 0,654411 | 0,591441 | 0,163423 | 0,159867 | 0,015873 | 0,010928 | -3,49598 | 4,72E-04              | 7,09E-03         | 14254    | 8751     |                                                                              |                                                                             |
| KYNA-SZR104                                                   | 107 | 164 | 271 | 0,708405  | 0,472714  | 0,542238  | 0,35269  | 0,792865 | 0,600867 | 0,654411 | 0,47365  | 0,163423 | 0,174232 | 0,015873 | 0,013647 | -7,55616 | 4,15E-14              | 6,23E-13         | 12540    | 4008     |                                                                              |                                                                             |
| KYNA-LPS+SZR104                                               | 107 | 209 | 316 | 0,708405  | 0,57479   | 0,542238  | 0,409766 | 0,792865 | 0,712989 | 0,654411 | 0,551494 | 0,163423 | 0,185485 | 0,015873 | 0,012861 | -4,70202 | 2,58E-06              | 3,86E-05         | 14796    | 7567     |                                                                              |                                                                             |
| LPS-KYNA                                                      | 131 | 107 | 238 | 0,612114  | 0,708405  | 0,490102  | 0,542238 | 0,689722 | 0,792865 | 0,594926 | 0,654411 | 0,137639 | 0,163423 | 0,012072 | 0,015873 | -3,39347 | 6,90E-04              | 1,04E-02         | 5295     | 8802     |                                                                              |                                                                             |
| LPS-LPS+KYNA                                                  | 131 | 215 | 346 | 0,612114  | 0,601394  | 0,490102  | 0,467334 | 0,689722 | 0,721002 | 0,594926 | 0,591441 | 0,137639 | 0,159867 | 0,012072 | 0,010928 | -0,041   | 9,67E-01              | 1,00E+00         | 14045    | 14120    |                                                                              |                                                                             |
| LPS-SZR104                                                    | 131 | 164 | 295 | 0,612114  | 0,472714  | 0,490102  | 0,35269  | 0,689722 | 0,600867 | 0,594926 | 0,47365  | 0,137639 | 0,174232 | 0,012072 | 0,013647 | -5,89654 | 3,71E-09              | 5,57E-08         | 15035    | 6499     |                                                                              |                                                                             |
| LPS-LPS+SZR104                                                | 131 | 209 | 340 | 0,612114  | 0,57479   | 0,490102  | 0,409766 | 0,689722 | 0,712989 | 0,594926 | 0,551494 | 0,137639 | 0,185485 | 0,012072 | 0,012861 | -1,85816 | 6,31E-02              | 9,47E-01         | 18329    | 12050    |                                                                              |                                                                             |
| CONTROL-LPS                                                   | 148 | 107 | 279 | 0,579778  | 0,612114  | 0,367577  | 0,490102 | 0,728114 | 0,689722 | 0,550972 | 0,594926 | 0,201349 | 0,137639 | 0,016607 | 0,012072 | -1,2645  | 2,06E-01              | 1,00E+00         | 5529     | 10545    |                                                                              |                                                                             |
| CONTROL-KYNA                                                  | 148 | 107 | 255 | 0,579778  | 0,708405  | 0,367577  | 0,542238 | 0,728114 | 0,792865 | 0,550972 | 0,654411 | 0,201349 | 0,163423 | 0,016607 | 0,015873 | -4,15752 | 3,22E-05              | 4,83E-04         | 5501     | 10335    |                                                                              |                                                                             |
| CONTROL-LPS+KYNA                                              | 148 | 215 | 363 | 0,579778  | 0,601394  | 0,367577  |          |          |          |          |          |          |          |          |          |          |                       |                  |          |          |                                                                              |                                                                             |





|                     |     |     |     |         |        |         |         |          |          |          |          |          |          |          |          |          |          |          |         |         |
|---------------------|-----|-----|-----|---------|--------|---------|---------|----------|----------|----------|----------|----------|----------|----------|----------|----------|----------|----------|---------|---------|
| LPS+KYNA-LPS+SZR104 | 215 | 209 | 424 | 2,1908  | 2,2262 | 1,76575 | 1,7655  | 2,78585  | 2,8529   | 2,439013 | 2,480052 | 0,947196 | 1,110152 | 0,064749 | 0,076975 | -0,02061 | 0,983557 | 1,00E+00 | 22494   | 22441   |
| KYNA-LPS+KYNA       | 107 | 215 | 322 | 2,5775  | 2,1908 | 1,8488  | 1,76575 | 3,177    | 2,78585  | 2,708796 | 2,439013 | 1,189976 | 0,947196 | 0,115581 | 0,064749 | -2,04917 | 0,040445 | 6,07E-01 | 13115,5 | 9889,5  |
| KYNA-SZR104         | 107 | 164 | 271 | 2,5775  | 2,0562 | 1,8488  | 1,67945 | 3,177    | 2,517975 | 2,708796 | 2,186927 | 1,189976 | 0,655597 | 0,115581 | 0,051335 | -3,69999 | 0,000216 | 3,24E-03 | 11108   | 6440    |
| KYNA-LPS+SZR104     | 107 | 209 | 316 | 2,5775  | 2,2262 | 1,8488  | 1,7655  | 3,177    | 2,8529   | 2,708796 | 2,480052 | 1,189976 | 1,110152 | 0,115581 | 0,076975 | -1,91906 | 0,054977 | 8,25E-01 | 12657   | 9706    |
| LPS-KYNA            | 131 | 107 | 238 | 2,0721  | 2,5775 | 1,682   | 1,8488  | 2,6434   | 3,177    | 2,312964 | 2,708796 | 0,963667 | 1,189976 | 0,085019 | 0,115581 | -3,03671 | 0,002392 | 3,59E-02 | 5403,5  | 8613,5  |
| LPS-LPS+KYNA        | 131 | 215 | 346 | 2,0721  | 2,1908 | 1,682   | 1,76575 | 2,6434   | 2,78585  | 2,312964 | 2,439013 | 0,963667 | 0,947196 | 0,085019 | 0,064749 | -1,62001 | 0,105229 | 1,00E+00 | 12620   | 15545   |
| LPS-SZR104          | 131 | 164 | 295 | 2,0721  | 2,0562 | 1,682   | 1,67945 | 2,6434   | 2,517975 | 2,312964 | 2,186927 | 0,963667 | 0,655597 | 0,085019 | 0,051335 | -0,3757  | 0,707138 | 1,00E+00 | 11016   | 10468   |
| LPS-LPS+SZR104      | 131 | 209 | 340 | 2,0721  | 2,2262 | 1,682   | 1,7655  | 2,6434   | 2,8529   | 2,312964 | 2,480052 | 0,963667 | 1,110152 | 0,085019 | 0,076975 | -1,48857 | 0,1366   | 1,00E+00 | 12376   | 15003   |
| CONTROL-LPS         | 148 | 131 | 279 | 2,43455 | 2,0721 | 1,9289  | 1,682   | 2,998075 | 2,6434   | 2,599627 | 2,312964 | 0,914128 | 0,969367 | 0,075396 | 0,085019 | -3,54373 | 0,000395 | 5,93E-03 | 12078   | 7310    |
| CONTROL-KYNA        | 148 | 107 | 255 | 2,43455 | 2,5775 | 1,9289  | 1,8488  | 2,998075 | 3,177    | 2,599627 | 2,708796 | 0,914128 | 1,189976 | 0,075396 | 0,115581 | -0,15398 | 0,877624 | 1,00E+00 | 7828    | 8008    |
| CONTROL-LPS+KYNA    | 148 | 215 | 363 | 2,43455 | 2,1908 | 1,9289  | 1,76575 | 2,998075 | 2,78585  | 2,599627 | 2,439013 | 0,914128 | 0,947196 | 0,075396 | 0,064749 | -2,34923 | 0,018812 | 2,82E-01 | 18218,5 | 13601,5 |
| CONTROL-SZR104      | 148 | 164 | 312 | 2,43455 | 2,0562 | 1,9289  | 1,67945 | 2,998075 | 2,517975 | 2,599627 | 2,186927 | 0,914128 | 0,655597 | 0,075396 | 0,051335 | -4,34664 | 0,000014 | 2,10E-04 | 15595   | 8677    |
| CONTROL-LPS+SZR104  | 148 | 209 | 357 | 2,43455 | 2,2262 | 1,9289  | 1,7655  | 2,998075 | 2,8529   | 2,599627 | 2,480052 | 0,914128 | 1,110152 | 0,075396 | 0,076975 | -2,30318 | 0,021269 | 3,19E-01 | 17679   | 13253   |

Convex hull circularity

|                     |     |     |     |          |          |          |          |          |          |          |          |          |          |          |          |          |          |          |       |       |
|---------------------|-----|-----|-----|----------|----------|----------|----------|----------|----------|----------|----------|----------|----------|----------|----------|----------|----------|----------|-------|-------|
| SZR104-LPS+SZR104   | 164 | 209 | 373 | 0,902669 | 0,918298 | 0,845733 | 0,847277 | 0,937594 | 0,947842 | 0,874552 | 0,889598 | 0,087759 | 0,077608 | 0,006874 | 0,005381 | -1,92295 | 0,054487 | 8,17E-01 | 15150 | 19126 |
| LPS+KYNA-SZR104     | 215 | 164 | 379 | 0,914743 | 0,902669 | 0,864825 | 0,845733 | 0,949328 | 0,937594 | 0,800945 | 0,874552 | 0,06726  | 0,087759 | 0,004598 | 0,006874 | -2,97868 | 0,002895 | 4,34E-02 | 20778 | 14482 |
| LPS+KYNA-LPS+SZR104 | 215 | 209 | 424 | 0,914743 | 0,918298 | 0,864825 | 0,847277 | 0,949328 | 0,947842 | 0,900945 | 0,889598 | 0,06726  | 0,077608 | 0,004598 | 0,005381 | -1,10263 | 0,270187 | 1,00E+00 | 23859 | 21076 |
| KYNA-LPS+KYNA       | 107 | 215 | 322 | 0,936686 | 0,914743 | 0,874595 | 0,864825 | 0,960115 | 0,949328 | 0,902639 | 0,900945 | 0,084544 | 0,06726  | 0,008212 | 0,004598 | -1,59232 | 0,111314 | 1,00E+00 | 12756 | 10249 |
| KYNA-SZR104         | 107 | 164 | 271 | 0,936686 | 0,902669 | 0,874595 | 0,845733 | 0,960115 | 0,937594 | 0,902639 | 0,874552 | 0,084544 | 0,087759 | 0,008212 | 0,006874 | -0,40345 | 0,000055 | 8,25E-04 | 11319 | 6229  |
| LPS+LPS+SZR104      | 107 | 209 | 316 | 0,936686 | 0,918298 | 0,874595 | 0,847277 | 0,960115 | 0,947842 | 0,902639 | 0,889598 | 0,084544 | 0,077608 | 0,008212 | 0,005381 | -2,41216 | 0,015858 | 2,38E-01 | 13036 | 9327  |
| LPS-KYNA            | 131 | 107 | 238 | 0,921307 | 0,936686 | 0,879463 | 0,874595 | 0,949242 | 0,960115 | 0,900798 | 0,902639 | 0,072915 | 0,084544 | 0,006395 | 0,008212 | -1,55006 | 0,121128 | 1,00E+00 | 6189  | 7828  |
| LPS-LPS+KYNA        | 131 | 215 | 346 | 0,921307 | 0,914743 | 0,879463 | 0,864825 | 0,949242 | 0,949328 | 0,900798 | 0,900945 | 0,072915 | 0,06726  | 0,006395 | 0,004598 | -0,40334 | 0,686697 | 1,00E+00 | 14447 | 13718 |
| LPS-SZR104          | 131 | 164 | 295 | 0,921307 | 0,902669 | 0,879463 | 0,845733 | 0,949242 | 0,937594 | 0,900798 | 0,874552 | 0,072915 | 0,087759 | 0,006395 | 0,006874 | -3,05439 | 0,002255 | 3,38E-02 | 12766 | 8518  |
| LPS-LPS+SZR104      | 131 | 209 | 340 | 0,921307 | 0,918298 | 0,879463 | 0,847277 | 0,949242 | 0,947842 | 0,900798 | 0,889598 | 0,072915 | 0,077608 | 0,006395 | 0,005381 | -1,15639 | 0,247521 | 1,00E+00 | 14910 | 12669 |
| CONTROL-LPS         | 148 | 131 | 279 | 0,884521 | 0,921307 | 0,81198  | 0,879463 | 0,937839 | 0,949242 | 0,85356  | 0,900798 | 0,107286 | 0,072915 | 0,008849 | 0,006395 | -8,277   | 0,000129 | 1,94E-03 | 7119  | 12269 |
| CONTROL-KYNA        | 148 | 107 | 255 | 0,884521 | 0,936686 | 0,81198  | 0,874595 | 0,937839 | 0,960115 | 0,85356  | 0,902639 | 0,107286 | 0,084544 | 0,008849 | 0,008212 | -4,40527 | 0,000011 | 1,65E-04 | 5357  | 10479 |
| CONTROL-LPS+KYNA    | 148 | 215 | 363 | 0,884521 | 0,914743 | 0,81198  | 0,864825 | 0,937839 | 0,949328 | 0,85356  | 0,900945 | 0,107286 | 0,06726  | 0,008849 | 0,004598 | -4,06077 | 0,000049 | 7,35E-04 | 11920 | 19900 |
| CONTROL-SZR104      | 148 | 164 | 312 | 0,884521 | 0,902669 | 0,81198  | 0,845733 | 0,937839 | 0,937594 | 0,85356  | 0,874552 | 0,107286 | 0,087759 | 0,008849 | 0,006874 | -1,34792 | 0,177685 | 1,00E+00 | 11063 | 13209 |
| CONTROL-LPS+SZR104  | 148 | 209 | 357 | 0,884521 | 0,918298 | 0,81198  | 0,847277 | 0,937839 | 0,947842 | 0,85356  | 0,889598 | 0,107286 | 0,077608 | 0,008849 | 0,005381 | -3,02355 | 0,002498 | 3,75E-02 | 12561 | 18371 |

Kruskal-Wallis H statistic=35,915502735983736, p-value=9,87500430584392e-07

Span ratio of the convex hull

|                     |     |     |     |         |         |          |          |          |          |          |          |          |          |          |          |          |          |          |         |         |
|---------------------|-----|-----|-----|---------|---------|----------|----------|----------|----------|----------|----------|----------|----------|----------|----------|----------|----------|----------|---------|---------|
| SZR104-LPS+SZR104   | 164 | 209 | 373 | 1,30035 | 1,2901  | 1,187475 | 1,1679   | 1,589325 | 1,5479   | 1,470377 | 1,430428 | 0,459771 | 0,380788 | 0,036012 | 0,026403 | -0,77547 | 0,438064 | 1,00E+00 | 17940   | 16336   |
| LPS+KYNA-SZR104     | 215 | 164 | 379 | 1,3201  | 1,30035 | 1,16415  | 1,187475 | 1,5434   | 1,589325 | 1,39912  | 1,470377 | 0,342365 | 0,459771 | 0,023404 | 0,036012 | -0,95725 | 0,338443 | 1,00E+00 | 16618   | 18642   |
| LPS+KYNA-LPS+SZR104 | 215 | 209 | 424 | 1,3201  | 1,2901  | 1,16415  | 1,1679   | 1,5434   | 1,5479   | 1,39912  | 1,430428 | 0,342365 | 0,380788 | 0,023404 | 0,026403 | -0,27665 | 0,782049 | 1,00E+00 | 22118   | 22817   |
| KYNA-LPS+KYNA       | 107 | 215 | 322 | 1,4235  | 1,3201  | 1,14235  | 1,16415  | 1,4277   | 1,5434   | 1,3791   | 1,39912  | 0,414893 | 0,342365 | 0,040298 | 0,023404 | -1,98881 | 0,046722 | 7,01E-01 | 9937    | 13068   |
| KYNA-SZR104         | 107 | 164 | 271 | 1,24    | 1,30035 | 1,14235  | 1,187475 | 1,4277   | 1,589325 | 1,3791   | 1,470377 | 0,414893 | 0,459771 | 0,040298 | 0,036012 | -2,64874 | 0,008079 | 1,21E-01 | 7103    | 10445   |
| LPS+LPS+SZR104      | 107 | 209 | 316 | 1,24    | 1,2901  | 1,14235  | 1,1679   | 1,4277   | 1,5479   | 1,3791   | 1,430428 | 0,414893 | 0,380788 | 0,040298 | 0,026403 | -1,99972 | 0,04553  | 6,83E-01 | 9644    | 12719   |
| LPS-KYNA            | 131 | 107 | 238 | 1,2535  | 1,24    | 1,143    | 1,14235  | 1,40775  | 1,4277   | 1,367149 | 1,3791   | 0,374569 | 0,414893 | 0,023282 | 0,040298 | -0,41165 | 0,680599 | 1,00E+00 | 7226,5  | 6790,5  |
| LPS-LPS+KYNA        | 131 | 215 | 346 | 1,2535  | 1,30035 | 1,143    | 1,16415  | 1,40775  | 1,5434   | 1,367149 | 1,39912  | 0,374569 | 0,342365 | 0,023282 | 0,023404 | -1,73027 | 0,083582 | 1,00E+00 | 12520,5 | 15644,5 |
| LPS-SZR104          | 131 | 164 | 295 | 1,2535  | 1,30035 | 1,143    | 1,187475 | 1,40775  | 1,589325 | 1,367149 | 1,470377 | 0,374569 | 0,459771 | 0,023282 | 0,036012 | -2,38793 | 0,018377 | 9,02E-01 | 9025    | 12459   |
| LPS-LPS+SZR104      | 131 | 209 | 340 | 1,2535  | 1,2901  | 1,143    | 1,1679   | 1,40775  | 1,5479   | 1,367149 | 1,430428 | 0,374569 | 0,380788 | 0,023282 | 0,026403 | -1,81338 | 0,069773 | 1,00E+00 | 12089,5 | 15289,5 |
| CONTROL-LPS         | 148 | 131 | 279 | 1,40735 | 1,2535  | 1,1601   | 1,143    | 1,685375 | 1,40775  | 1,547539 | 1,367149 | 0,508331 | 0,342365 | 0,041926 | 0,023282 | -3,38464 | 0,000713 | 1,07E-02 | 11971   | 7417    |
| CONTROL-KYNA        | 148 | 107 | 255 | 1,40735 | 1,24    | 1,1601   | 1,14235  | 1,685375 | 1,4277   | 1,547539 | 1,3791   | 0,508331 | 0,414893 | 0,041926 | 0,040298 | -3,2147  | 0,001306 | 1,96E-02 | 9787    | 6049    |
| CONTROL-LPS+KYNA    | 148 | 215 | 363 | 1,40735 | 1,3201  | 1,1601   | 1,16415  | 1,685375 | 1,5434   | 1,547539 | 1,39912  | 0,508331 | 0,342365 | 0,041926 | 0,023404 | -2,21691 | 0,026629 | 3,99E-01 | 18088,5 | 13731,5 |
| CONTROL-SZR104      | 148 | 164 | 312 | 1,40735 | 1,30035 | 1,1601   | 1,187475 | 1,685375 | 1,589325 | 1,547539 | 1,470377 | 0,508331 | 0,459771 | 0,041926 | 0,036012 | -1,21784 | 0,223285 | 1,00E+00 | 13105,5 | 11166,5 |
| CONTROL-LPS+SZR104  | 148 | 209 | 357 | 1,40735 | 1,2901  | 1,1601   | 1,1679   | 1,685375 | 1,5479   | 1,547539 | 1,430428 | 0,508331 | 0,380788 | 0,041926 | 0,026403 | -1,88054 | 0,060034 | 9,01E-01 | 17273   | 13659   |

Kruskal-Wallis H statistic=18,711094609125098, p-value=0,002175377626330435

Density

|                     |     |     |     |          |          |          |          |          |          |          |          |          |          |          |          |          |          |          |       |       |
|---------------------|-----|-----|-----|----------|----------|----------|----------|----------|----------|----------|----------|----------|----------|----------|----------|----------|----------|----------|-------|-------|
| SZR104-LPS+SZR104   | 164 | 209 | 373 | 0,90147  | 0,928966 | 0,856215 | 0,890568 | 0,940043 | 0,967588 | 0,878695 | 0,918235 | 0,094619 | 0,064602 | 0,007411 | 0,004479 | -4,93096 | 8,18E-07 | 1,23E-05 | 12041 | 22235 |
| LPS+KYNA-SZR104     | 215 | 164 | 379 | 0,939061 | 0,90147  | 0,908073 | 0,856215 | 0,971077 | 0,940043 | 0,929989 | 0,878695 | 0,053334 | 0,094619 | 0,003646 | 0,007411 | -6,62217 | 3,54E-11 | 5,31E-10 | 24628 | 10632 |
| LPS+KYNA-LPS+SZR104 | 215 | 209 | 424 | 0,939061 | 0,928966 | 0,908073 | 0,890568 | 0,971077 | 0,967588 | 0,929989 | 0,918235 | 0,053334 | 0,064602 | 0,003646 | 0,004479 | -1,71142 | 8,70E-02 | 1,00E+00 | 24627 | 20308 |
| KYNA-LPS+KYNA       | 107 | 215 | 322 | 0,958879 | 0,939061 | 0,908425 | 0,908073 | 0,981775 | 0,971077 | 0,938015 | 0,929989 | 0,060643 | 0,053334 | 0,00589  | 0,003646 | -2,2722  | 2,31E-02 | 3,46E-01 | 13021 | 9714  |
| KYNA-SZR104         | 107 | 164 | 271 | 0,958879 | 0,90147  | 0,908425 | 0,856215 | 0,981775 | 0,940043 | 0,938015 | 0,878695 | 0,060643 | 0,094619 | 0,00589  | 0,007411 | -6,71896 | 1,83E-11 | 2,75E-10 | 13212 | 4536  |

|                    |     |     |     |          |          |         |          |          |         |          |         |         |          |          |          |          |          |          |       |       |
|--------------------|-----|-----|-----|----------|----------|---------|----------|----------|---------|----------|---------|---------|----------|----------|----------|----------|----------|----------|-------|-------|
| CONTROL-LPS+SZR104 | 148 | 209 | 357 | 1,157228 | 1,189725 | 1,09821 | 1,109959 | 1,333607 | 1,39061 | 1,229795 | 1,27302 | 0,17752 | 0,222469 | 0,014642 | 0,015425 | -2,01275 | 4,41E-02 | 6,62E-01 | 13532 | 17400 |
|--------------------|-----|-----|-----|----------|----------|---------|----------|----------|---------|----------|---------|---------|----------|----------|----------|----------|----------|----------|-------|-------|

|                     |     |     |     |         |        |          |         |          |          |          |          |          |          |          |          |          |          |          |         |         |
|---------------------|-----|-----|-----|---------|--------|----------|---------|----------|----------|----------|----------|----------|----------|----------|----------|----------|----------|----------|---------|---------|
| Fractal dimension   |     |     |     |         |        |          |         |          |          |          |          |          |          |          |          |          |          |          |         |         |
| SZR104-LPS+SZR104   | 164 | 209 | 373 | 1,0767  | 1,067  | 1,05765  | 1,0423  | 1,106425 | 1,1073   | 1,087849 | 1,077493 | 0,04026  | 0,044046 | 0,003153 | 0,003054 | -3,16282 | 1,56E-03 | 2,34E-02 | 20407,5 | 13868,5 |
| LPS+KYNA-SZR104     | 215 | 164 | 379 | 1,0616  | 1,0767 | 1,04405  | 1,05765 | 1,0879   | 1,106425 | 1,069682 | 1,087849 | 0,034995 | 0,04026  | 0,002392 | 0,003153 | -4,87708 | 1,08E-06 | 1,62E-05 | 12476   | 22784   |
| LPS+KYNA-LPS+SZR104 | 215 | 209 | 424 | 1,0616  | 1,067  | 1,04405  | 1,0423  | 1,0879   | 1,1073   | 1,069682 | 1,077493 | 0,034995 | 0,044046 | 0,002392 | 0,003054 | -1,21401 | 2,25E-01 | 1,00E+00 | 20935,5 | 23999,5 |
| KYNA-LPS+KYNA       | 107 | 215 | 322 | 1,0493  | 1,0616 | 1,03685  | 1,04405 | 1,0647   | 1,0879   | 1,054827 | 1,069682 | 0,028332 | 0,034995 | 0,002752 | 0,002392 | -3,81114 | 1,38E-04 | 2,08E-03 | 8503    | 14502   |
| KYNA-SZR104         | 107 | 164 | 271 | 1,0493  | 1,0767 | 1,03685  | 1,05765 | 1,0647   | 1,106425 | 1,054827 | 1,087849 | 0,028332 | 0,04026  | 0,002752 | 0,003153 | -7,36033 | 1,83E-13 | 2,75E-12 | 4131,5  | 13416,5 |
| KYNA-LPS+SZR104     | 107 | 209 | 316 | 1,0493  | 1,067  | 1,03685  | 1,0423  | 1,0647   | 1,1073   | 1,054827 | 1,077493 | 0,028332 | 0,044046 | 0,002752 | 0,003054 | -4,31886 | 1,57E-05 | 2,35E-04 | 7861,5  | 14501,5 |
| LPS-KYNA            | 131 | 107 | 238 | 1,0611  | 1,0493 | 1,04425  | 1,03685 | 1,08015  | 1,0647   | 1,064819 | 1,054827 | 0,028907 | 0,028332 | 0,002535 | 0,002752 | -3,04334 | 2,34E-03 | 3,51E-02 | 8617    | 5400    |
| LPS-LPS+KYNA        | 131 | 215 | 346 | 1,0611  | 1,0616 | 1,04425  | 1,04405 | 1,08015  | 1,0879   | 1,064819 | 1,069682 | 0,028907 | 0,034995 | 0,002535 | 0,002392 | -0,75682 | 4,49E-01 | 1,00E+00 | 13399   | 14766   |
| LPS-SZR104          | 131 | 164 | 295 | 1,0611  | 1,0767 | 1,04425  | 1,05765 | 1,08015  | 1,106425 | 1,064819 | 1,087849 | 0,028907 | 0,04026  | 0,002535 | 0,003153 | -5,22206 | 1,77E-07 | 2,65E-06 | 6940    | 14544   |
| LPS-LPS+SZR104      | 131 | 209 | 340 | 1,0611  | 1,067  | 1,04425  | 1,0423  | 1,08015  | 1,1073   | 1,064819 | 1,077493 | 0,028907 | 0,044046 | 0,002535 | 0,003054 | -1,82528 | 6,80E-02 | 1,00E+00 | 12079   | 15300   |
| CONTROL-LPS         | 148 | 131 | 279 | 1,05605 | 1,0611 | 1,039975 | 1,04425 | 1,091425 | 1,08015  | 1,069746 | 1,064819 | 0,040748 | 0,028907 | 0,003361 | 0,002535 | -0,12415 | 9,01E-01 | 1,00E+00 | 9610    | 9778    |
| CONTROL-KYNA        | 148 | 107 | 255 | 1,05605 | 1,0493 | 1,039975 | 1,03685 | 1,091425 | 1,0647   | 1,069746 | 1,054827 | 0,040748 | 0,028332 | 0,003361 | 0,002752 | -2,58759 | 9,86E-03 | 1,45E-01 | 9422,5  | 6413,5  |
| CONTROL-LPS+KYNA    | 148 | 215 | 363 | 1,05605 | 1,0616 | 1,039975 | 1,04405 | 1,091425 | 1,0879   | 1,069746 | 1,069682 | 0,040748 | 0,034995 | 0,003361 | 0,002392 | -0,86569 | 3,87E-01 | 1,00E+00 | 15059   | 16761   |
| CONTROL-SZR104      | 148 | 164 | 312 | 1,05605 | 1,0767 | 1,039975 | 1,05765 | 1,091425 | 1,106425 | 1,069746 | 1,087849 | 0,040748 | 0,04026  | 0,003361 | 0,003153 | -4,73813 | 2,16E-06 | 3,24E-05 | 8365,5  | 15906,5 |
| CONTROL-LPS+SZR104  | 148 | 209 | 357 | 1,05605 | 1,067  | 1,039975 | 1,0423  | 1,091425 | 1,1073   | 1,069746 | 1,077493 | 0,040748 | 0,044046 | 0,003361 | 0,003054 | -1,69941 | 8,92E-02 | 1,00E+00 | 13833   | 17099   |

Kruskal-Wallis H statistic=61,76089993261856, p-value=5,255330840669825e-12

|                     |     |     |     |         |         |          |          |          |          |          |          |          |          |          |          |          |          |          |         |         |
|---------------------|-----|-----|-----|---------|---------|----------|----------|----------|----------|----------|----------|----------|----------|----------|----------|----------|----------|----------|---------|---------|
| Lacunarity          |     |     |     |         |         |          |          |          |          |          |          |          |          |          |          |          |          |          |         |         |
| SZR104-LPS+SZR104   | 164 | 209 | 373 | 0,17855 | 0,1157  | 0,107975 | 0,1024   | 0,226025 | 0,1834   | 0,171496 | 0,142256 | 0,064462 | 0,056705 | 0,005049 | 0,003932 | -3,86766 | 1,10E-04 | 1,65E-03 | 21136   | 13140   |
| LPS+KYNA-SZR104     | 215 | 164 | 379 | 0,1131  | 0,17855 | 0,09985  | 0,107975 | 0,12595  | 0,226025 | 0,125109 | 0,171496 | 0,044318 | 0,064462 | 0,003029 | 0,005049 | -6,22139 | 4,93E-10 | 7,39E-09 | 11055,5 | 24204,5 |
| LPS+KYNA-LPS+SZR104 | 215 | 209 | 424 | 0,1131  | 0,1157  | 0,09985  | 0,1024   | 0,12595  | 0,1834   | 0,125109 | 0,142256 | 0,044318 | 0,056705 | 0,003029 | 0,003932 | -2,35191 | 1,87E-02 | 2,80E-01 | 19500   | 25435   |
| KYNA-LPS+KYNA       | 107 | 215 | 322 | 0,118   | 0,1131  | 0,1104   | 0,09985  | 0,1303   | 0,12595  | 0,124479 | 0,125109 | 0,029211 | 0,044318 | 0,002837 | 0,003029 | -2,52254 | 1,17E-02 | 1,75E-01 | 13488   | 9517    |
| KYNA-SZR104         | 107 | 164 | 271 | 0,118   | 0,17855 | 0,1104   | 0,107975 | 0,1303   | 0,226025 | 0,124479 | 0,171496 | 0,029211 | 0,064462 | 0,002837 | 0,005049 | -4,50309 | 6,70E-06 | 1,00E-04 | 5933,5  | 11614,5 |
| KYNA-LPS+SZR104     | 107 | 209 | 316 | 0,118   | 0,1157  | 0,1104   | 0,1024   | 0,1303   | 0,1834   | 0,124479 | 0,142256 | 0,029211 | 0,056705 | 0,002837 | 0,003932 | -0,02082 | 9,83E-01 | 1,00E+00 | 11198   | 11165   |
| LPS-KYNA            | 131 | 107 | 238 | 0,1121  | 0,118   | 0,09805  | 0,1104   | 0,12985  | 0,1303   | 0,127583 | 0,124479 | 0,048866 | 0,029211 | 0,004286 | 0,002837 | -2,38187 | 1,72E-02 | 2,58E-01 | 5749,5  | 8267,5  |
| LPS-LPS+KYNA        | 131 | 215 | 346 | 0,1121  | 0,1131  | 0,09805  | 0,09985  | 0,12985  | 0,12595  | 0,127583 | 0,125109 | 0,048866 | 0,044318 | 0,004286 | 0,003029 | -0,21608 | 8,29E-01 | 1,00E+00 | 13887   | 14278   |
| LPS-SZR104          | 131 | 164 | 295 | 0,1121  | 0,17855 | 0,09805  | 0,107975 | 0,12985  | 0,226025 | 0,127583 | 0,171496 | 0,048866 | 0,064462 | 0,004286 | 0,005049 | -5,33402 | 9,60E-08 | 1,44E-06 | 6858,5  | 14625,5 |
| LPS-LPS+SZR104      | 131 | 209 | 340 | 0,1121  | 0,1157  | 0,09805  | 0,1024   | 0,12985  | 0,1834   | 0,127583 | 0,142256 | 0,048866 | 0,056705 | 0,004286 | 0,003932 | -2,20055 | 2,78E-02 | 4,17E-01 | 11748   | 15631   |
| CONTROL-LPS         | 148 | 131 | 279 | 0,12835 | 0,1121  | 0,1093   | 0,09805  | 0,152225 | 0,12985  | 0,154234 | 0,127583 | 0,067546 | 0,048866 | 0,005571 | 0,004286 | -4,93907 | 7,85E-07 | 1,18E-05 | 13016,5 | 6371,5  |
| CONTROL-KYNA        | 148 | 107 | 255 | 0,12835 | 0,118   | 0,1093   | 0,1104   | 0,152225 | 0,1303   | 0,154234 | 0,124479 | 0,067546 | 0,029211 | 0,005571 | 0,002837 | -3,24051 | 1,19E-03 | 1,79E-02 | 9802    | 6034    |
| CONTROL-LPS+KYNA    | 148 | 215 | 363 | 0,12835 | 0,1131  | 0,1093   | 0,09985  | 0,152225 | 0,12595  | 0,154234 | 0,125109 | 0,067546 | 0,044318 | 0,005571 | 0,003029 | -5,62065 | 1,90E-08 | 2,85E-07 | 21432,5 | 10387,5 |
| CONTROL-SZR104      | 148 | 164 | 312 | 0,12835 | 0,17855 | 0,1093   | 0,107975 | 0,152225 | 0,226025 | 0,154234 | 0,171496 | 0,067546 | 0,064462 | 0,005571 | 0,005049 | -1,64075 | 1,01E-01 | 1,00E+00 | 10830   | 13442   |
| CONTROL-LPS+SZR104  | 148 | 209 | 357 | 0,12835 | 0,1157  | 0,1093   | 0,1024   | 0,152225 | 0,1834   | 0,154234 | 0,142256 | 0,067546 | 0,056705 | 0,005571 | 0,003932 | -2,92153 | 3,48E-03 | 5,23E-02 | 18273   | 12659   |

Kruskal-Wallis H statistic=67,44662752146029, p-value=3,480008346745085e-13

## Supplementary Information

**Supplementary Figure S1.** Fluorescent immunocytochemistry on control and treated microglial cells. CD11b/c-immunopositive microglia with DAPI-labeled nuclei used to quantitatively analyze cytomorphological heterogeneity in secondary microglial cultures (DIV7). A total of 974 cells were analyzed (see Table S1, for details). (A) Control, unchallenged microglia (n = 148), (B) LPS-challenged microglia (n = 131), (C) KYNA-treated microglia (n = 107), (D) LPS-challenged, KYNA-treated microglia (n = 215), (E) SZR104-treated microglia (n = 164), and (F) LPS-challenged and SZR104-treated microglia (n = 209). Some images contain > 1 microglia; consequently, some cells are shown multiple times. Scale bar: 100  $\mu$ m.

**Supplementary Figure S2.** Digital image processing and measurement pipeline (Part 1) of two-channel digital images of individual microglial cells. (A) CD11b/c-labeled cells and DAPI-labeled nuclei of selected individual cells were cropped to 400  $\times$  400-pixel two-channel (CD11b/c-red and DAPI-blue) images from the original 1920  $\times$  1440-pixel fluorescence microscopy images. (B) Individual DAPI-labeled nuclei observed using only the blue color channel. Each color channel can be displayed separately in ImageJ allowing for clear identification of individual cells during cell sorting (Image  $\rightarrow$  Color  $\rightarrow$  Channels Tool...  $\rightarrow$  Convert to multi-channel composite image?  $\rightarrow$  OK). (C) Visualization of CD11b/c-positive cytoplasm in individual cells using only the red color channel. (D) Microglial cell nuclei visualized in grayscale. After splitting the images of DAPI-labeled microglial cell nuclei, the image type was set to 8-bit grayscale (Image  $\rightarrow$  Color  $\rightarrow$  Split channels; Image  $\rightarrow$  Type  $\rightarrow$  8-bit). (E) Grayscale representation of the cytoplasm of microglial cells. After splitting the images of CD11b/c-positive microglial cytoplasms, the image type was set to 8-bit grayscale. (Image  $\rightarrow$  Color  $\rightarrow$  Split channels; Image  $\rightarrow$  Type  $\rightarrow$  8-bit). (F) Segmented images of individual DAPI-labeled cell nuclei. The 8-bit grayscale images of cell nuclei were transformed into binary images using the same threshold for all individual cell/cell nuclei images during segmentation (Image  $\rightarrow$  Adjust  $\rightarrow$  Threshold...). Scale bar: 100  $\mu$ m.

**Supplementary Figure S3.** Digital image processing and measurement pipeline (Part 2).

(G) Segmented images of CD11b/c-positive cytoplasm of individual cells. The 8-bit grayscale cytoplasm images were transformed into binary images using the same thresholding procedure for all individual cell images during segmentation.

(Image→Adjust→Threshold...). (H, I) Threshold and clean binary silhouettes of individual DAPI-labeled nuclei and CD11b/c-positive cytoplasm processed to clear the background and separate cells from each other so the silhouettes would be formed by a continuous set of foreground pixels. Basic ImageJ commands were used to clean the images and, if necessary, the cells were manually separated from each other, carefully considering the original image. These figures show the silhouettes before applying the fill holes command to visualize staining complementarity (Analyze→Analyze Particles: Size (depends on the circumstances), Show: Masks, Exclude on edges;

Process→Binary: Fill holes, Watershed; Freehand selections (when necessary),

Edit→Cut; Wand tool, Edit→Selection→Make Inverse). Note that not all commands

were necessarily applied in each case. (J) Complementarity of the silhouettes obtained

by nuclear and cytoplasmic staining by superimposing the threshold and clear silhouettes of the nuclei and cytoplasm in their original position. These figures show the silhouettes before applying the fill holes command to visualize staining

complementarity. (K) Merged silhouettes of corresponding microglial cytoplasm and cell nuclei showing all foreground pixels of the threshold and clean microglial

cytoplasm and nucleus silhouettes. The figure shows the silhouettes after applying the

fill holes command. These final silhouettes and their outlined versions were used for

measurement and analysis. (L) Visualization of the outlined versions of the silhouettes

(black contour lines enclosing the dark gray areas), the convex hull (black edges of convex polygons enclosing the dark gray areas and white concavities) and the

bounding circle (black bounding circles enclosing the light gray parts as well) of these

shapes. The original convex hull figures generated by FraCLac for ImageJ were used to

create this image; coloring is used to enhance visibility (Process→Binary→Outline).

Scale bar: 100  $\mu\text{m}$ .

**Supplementary Figure S4.** Determination of fractal dimension and lacunarity by the

box counting method. The figure shows the outlined silhouettes with a series of

successive grid calibers by superimposing the different sized grids from the FracLac plugin measurements of one case for each cell silhouette from the 12 averaged different and random grid placements used to calculate the slope: Plugins→Fractal Analysis→FracLac→Box Counting (BC). The box size scale was determined as “Power series” with base 2 and exponent 2 in “Grid design” to create the successive sizes. The “Use binary” option for binary scans was selected and white was locked as background to obtain the number of boxes containing any foreground pixels of the outlined binary silhouettes. To calculate the results, “Db” (box counting fractal dimension) in the “Colour Coding” window was then selected as the type of fractal dimension. To illustrate the method, representative traced microglial cells from control (A) and SZR104 treated (B) cultures are shown. Scale bar: 100  $\mu\text{m}$ .

**Supplementary Table S1. Quantitative parameter values of individual microglial cells from control and treated cultures.** Values for area and convex hull area are in  $\mu\text{m}^2$ , while the values for perimeter, convex hull perimeter, mean radius of the convex hull, maximum span across the convex hull, and diameter of the bounding circle are provided in  $\mu\text{m}$ . Circularity, transformation index, the ratio maximum/minimum convex hull radii, convex hull circularity, span ratio of the convex hull, density, roughness, fractal dimension, and lacunarity are dimensionless numbers. See the main text for abbreviations.

**Supplementary Table S2. Statistical analysis on selected quantitative parameters of control and treated secondary microglia.** The non-parametric Kruskal–Wallis H-test followed by Mann–Whitney U post-hoc analysis of multiple pairwise comparisons between groups with Bonferroni correction was performed to avoid false significance values. See the main text for abbreviations.
